1       **Spatiotemporal transcriptome at single-cell resolution reveals key**  
2       **radial glial cell population in axolotl telencephalon development and**  
3       **regeneration**

4 Xiaoyu Wei<sup>1,18</sup>, Sulei Fu<sup>2,3,18</sup>, Hanbo Li<sup>1,4,5,18,\*</sup>, Yang Liu<sup>1,18</sup>, Shuai Wang<sup>1,6,18</sup>, Weimin  
5 Feng<sup>1,6,18</sup>, Yunzhi Yang<sup>1,7,18</sup>, Xiawei Liu<sup>4</sup>, Yan-Yun Zeng<sup>2,3</sup>, Mengnan Cheng<sup>1,6</sup>, Yiwei Lai<sup>8</sup>,  
6 Xiaojie Qiu<sup>9,10</sup>, Liang Wu<sup>1,6</sup>, Nannan Zhang<sup>4</sup>, Yujia Jiang<sup>1,7</sup>, Jiangshan Xu<sup>1,6</sup>, Xiaoshan  
7 Su<sup>4</sup>, Cheng Peng<sup>2,3</sup>, Lei Han<sup>1,11,12</sup>, Wilson Pak-Kin Lou<sup>2,3</sup>, Chuanyu Liu<sup>1,12</sup>, Yue Yuan<sup>1,6</sup>,  
8 Kailong Ma<sup>1</sup>, Tao Yang<sup>1</sup>, Xiangyu Pan<sup>2</sup>, Shang Gao<sup>4</sup>, Ao Chen<sup>1,13</sup>, Miguel A. Esteban<sup>8,14</sup>,  
9 Huanming Yang<sup>1,15</sup>, Jian Wang<sup>1,15</sup>, Guangyi Fan<sup>1</sup>, Longqi Liu<sup>1,12</sup>, Liang Chen<sup>16,\*</sup>, Xun  
10 Xu<sup>1,17,\*</sup>, Ji-Feng Fei<sup>2,\*</sup>, Ying Gu<sup>1,6,17,19\*</sup>

11  
12 <sup>1</sup>BGI-Shenzhen, Shenzhen 518103, China.

13 <sup>2</sup>Department of Pathology, Guangdong Provincial People's Hospital, Guangdong  
14 Academy of Medical Sciences, Guangzhou 510080, China.

15 <sup>3</sup>Key Laboratory of Brain, Cognition and Education Sciences, Ministry of Education;  
16 Institute for Brain Research and Rehabilitation, South China Normal University,  
17 Guangzhou 510631, China.

18 <sup>4</sup>BGI-Qingdao, Qingdao 266555, China.

19 <sup>5</sup>Lars Bolund Institute of Regenerative Medicine, Qingdao-Europe Advanced Institute for  
20 Life Sciences, BGI-Qingdao, Qingdao 266555, China.

21 <sup>6</sup>College of Life Sciences, University of Chinese Academy of Sciences, Beijing 100049,  
22 China.

23 <sup>7</sup>BGI College, Zhengzhou University, Zhengzhou, China.

24 <sup>8</sup>Laboratory of Integrative Biology, Guangzhou Institutes of Biomedicine and Health,  
25 Chinese Academy of Sciences, Guangzhou 510530, China.

26 <sup>9</sup>Whitehead Institute for Biomedical Research Cambridge, MA 02142, USA.

27 <sup>10</sup>Howard Hughes Medical Institute, Massachusetts Institute of Technology, Cambridge,  
28 MA 02139, USA.

29 <sup>11</sup>Shenzhen Key Laboratory of Single-Cell Omics, BGI-Shenzhen, Shenzhen 518120,

30 China.

31 <sup>12</sup>Shenzhen Bay Laboratory, Shenzhen 518000, China.

32 <sup>13</sup>Department of Biology, University of Copenhagen, Copenhagen DK-2200, Denmark.

33 <sup>14</sup>Institute of Stem Cells and Regeneration, Chinese Academy of Sciences, Beijing  
34 100101, China.

35 <sup>15</sup>James D. Watson Institute of Genome Sciences, Hangzhou 310058, China.

36 <sup>16</sup>Hubei Key Laboratory of Cell Homeostasis, RNA Institute, College of Life Sciences,  
37 Wuhan University, Wuhan, 430072, China.

38 <sup>17</sup>Guangdong Provincial Key Laboratory of Genome Read and Write, Shenzhen 518120,  
39 China.

40 <sup>18</sup>These authors contributed equally to this work.

41 <sup>19</sup>Lead contact.

42

43 \*Correspondence: [guying@genomics.cn](mailto:guying@genomics.cn) (Y.G.), [jifengfei@gdph.org.cn](mailto:jifengfei@gdph.org.cn) (J.F.F.),  
44 [xuxun@genomics.cn](mailto:xuxun@genomics.cn) (X.X.), [liang\\_chen@whu.edu.cn](mailto:liang_chen@whu.edu.cn) (L.C.), [lihanbo@genomics.cn](mailto:lihanbo@genomics.cn)  
45 (H.L.).

## 46 **SUMMARY**

47 Brain regeneration requires a precise coordination of complex responses in a time- and  
48 region-specific manner. Identifying key cell types and molecules that direct brain  
49 regeneration would provide potential targets for the advance of regenerative medicine.  
50 However, progress in the field has been hampered largely due to limited regeneration  
51 capacity of the mammalian brain and understanding of the regeneration process at both  
52 cellular and molecular level. Here, using axolotl brain with extraordinary regeneration ability  
53 upon injury, and the SpaTial Enhanced REsolution Omics-sequencing (Stereo-seq), we  
54 reconstructed the first architecture of axolotl telencephalon with gene expression profiling  
55 at single-cell resolution, and fine cell dynamics maps throughout development and

56 regeneration. Intriguingly, we discovered a marked heterogeneity of radial glial cell (RGC)  
57 types with distinct behaviors. Of note, one subtype of RGCs is activated since early  
58 regeneration stages and proliferates while other RGCs remain dormant. Such RGC  
59 subtype appears to be the major cell population involved in early wound healing response  
60 and gradually covers the injured area before presumably transformed into the lost  
61 neurons. Altogether, our work systematically decoded the complex cellular and molecular  
62 dynamics of axolotl telencephalon in development and regeneration, laying the foundation  
63 for studying the regulatory mechanism of brain regeneration in the future.

## 64 **INTRODUCTION**

65 Brain is the most complex organ that controls emotion, memory, learning and many other  
66 functions, the brain in mammals, including human, has very limited regeneration  
67 capability, which even declines along development (Diotel et al., 2020; Kaslin et al., 2008;  
68 Tanaka and Ferretti, 2009), making researches or efforts on repairing of the injured brain  
69 extremely challenge. In contrast, some lower vertebrates such as teleost fish and  
70 salamanders preserve great ability of tissue regeneration (Joven and Simon, 2018;  
71 Kroehne et al., 2011; Lust and Tanaka, 2019; Maden et al., 2013). Among them, axolotl  
72 (*ambystoma mexicanum*), a tetrapod salamander species has been extensively studied  
73 (Amamoto et al., 2016; Echeverri and Tanaka, 2002; Gerber et al., 2018; Li et al., 2021a;  
74 Maden et al., 2013). Over a hundred years ago, the first forebrain regeneration in axolotls  
75 was observed in larvae (Burr, 1916). Similar regeneration phenotypes were documented  
76 as well in sex matured (adult) axolotls after removal of a large proportion of  
77 telencephalons (Amamoto et al., 2016; Maden et al., 2013). Amazingly, recent studies

78 revealed that all lost cortical cell types, including neurons, could be reproduced at the  
79 lesion (Amamoto et al., 2016). As the telencephalon anatomy in axolotls and some other  
80 related salamander species is similar to that in mammals from the evolutionary point of  
81 view (González et al., 2017; Joven and Simon, 2018), in which the ventricular neural stem  
82 cells (NSCs) and neurons are located adjacent to the central lumen and peripheral pial  
83 surface respectively, Therefore, axolotls serve as an excellent models for studying the  
84 brain, in particular cortex regeneration, the discoveries of which may provide important  
85 insights in understanding the regeneration process in mammals.

86 Previous studies in varied regenerative species including axolotls have shown that  
87 ventricular radial glia cells (RGCs) respond to injury and contribute to brain regeneration  
88 (Berg et al., 2010; Joven and Simon, 2018; Kirkham et al., 2014). RGCs in adult  
89 salamanders are essentially the ancestor cells that give rise to nearly all cell types in the  
90 brain during early embryonic development (Merkle et al., 2004; Todd E. Anthony, 2004),  
91 and are maintained in the ventricular zone (VZ) (González et al., 2017). In contrast, most  
92 NSCs in mammals, except those in subventricular zone and hippocampal dentate gyrus,  
93 are almost completely consumed once the brain development is established. Under  
94 homeostatic state, dividing RGCs are sparsely located along the entire telencephalic VZ  
95 in axolotls, but only in a few confined VZ regions in red spotted newts. There are two  
96 groups of RGCs identified in telencephalon in red spotted newt, slow dividing and  
97 transient amplifying RGCs. The first group represents stem cell-like population, which  
98 express(Joven and Simon, 2018; Joven et al., 2018). Glial fibrillary acidic protein (GFAP)  
99 and glutamine synthetase, and show BrdU label-retaining property; the second group is  
100 located at the proliferative hot spots in VZ and frequently divide (Kirkham et al., 2014).

101 Upon injury, RGCs can be reactivated and expanded to broader areas in VZ. While both  
102 RGC groups could be detected close to lesion in red spotted newt, whether and how they  
103 contribute to brain regeneration is not clear (Kirkham et al., 2014; Maden et al., 2013). So  
104 far, only a few molecular signaling pathways that activate RGC and contribute to brain  
105 regeneration have been identified from salamanders and fish, such as Notch, FGF, and  
106 Gata3 (Kirkham et al., 2014; Kishimoto et al., 2012; Kizil et al., 2012). Interestingly, these  
107 signals are generally involved in brain development, implying that brain development and  
108 regeneration may share similarity in molecular regulation. Further investigation of this  
109 possibility and deeper understanding of brain regeneration requires more advanced  
110 technologies for systematic characterization of cell dynamics and the molecular  
111 expression in each cell type.

112 Many methods distinct in capturing strategy, resolution, and throughput, have been  
113 recently developed to obtain spatially resolved transcriptomic profiles of individual cells in  
114 a given tissue (Chen et al., 2021; Chen et al., 2015; Eng et al., 2019; Lubeck et al., 2014;  
115 Marx, 2021; Rodriques et al., 2019; Ståhl et al., 2016). However, one of the major  
116 technical challenges in the field is how to accurately assign a sequencing area to the  
117 physical location of each cell. Considering the complexity of the brain structure in general,  
118 well-defining of single cells will be essential to promote data accuracy and new  
119 discoveries. Mapping of the mouse brain or human cortex with spatial transcriptomics has  
120 been reported previously using barcoded slides (Maynard et al., 2021; Ortiz et al., 2020),  
121 but the resolution of these maps is limited by the diameters of the sequencing spots (100  
122  $\mu\text{m}$  or 55  $\mu\text{m}$ , respectively). Data at such a resolution can only provide the average  
123 expression profiling for a mixture of over dozens of cells, which encumbers detailed

124 investigation in regions with subtle networks of different cell types and molecular signals.  
125 In addition, the sequential fluorescence *in situ* hybridization (seqFISH+) (Eng et al., 2019)  
126 and multiplexed error-robust FISH (MERFISH) (Xia et al., 2019) have been developed for  
127 spatial profiling of gene expression of single cells, but their application may be restricted  
128 by the relative low throughput and the requirement of special equipment.

129 Taking advantages of a newly developed spatial-temporal transcriptomics  
130 approach—SpaTial Enhanced REsolution Omics-sequencing (Stereo-seq) (Chen et al.,  
131 2021) with the highest profiling resolution to date, we report here a *in situ* single-cell gene  
132 expression atlas and global cell dynamics in axolotl forebrain throughout development  
133 and the injury induced regeneration. We further identified the major brain RGCs  
134 participating in the pallium regeneration and establish molecular programs potentially  
135 involved in the activation of these cells and discovered presumably similar cell fate  
136 transition between telencephalon development and regeneration. Overall, our study  
137 provides comprehensive data sources for future investigation of the cellular and molecular  
138 mechanisms of brain regeneration.

## 139 **RESULTS**

### 140 **Establishment of spatial transcriptome profile of axolotl brain at single-cell** 141 **resolution**

142 To first identify the individual cell types with precise location and transcriptome  
143 information in axolotl telencephalon, we prepared frozen sections of the adult axolotl  
144 telencephalon, followed by the Stereo-seq analysis on the entire section simultaneously

145 (Chen et al., 2021) (Figure 1A). Considering the size of the axolotl cells (Herrick, 1948;  
146 Roth and Walkowiak, 2015; Westhoff and Roth, 2002), we collected coronal brain  
147 sections at 20  $\mu\text{m}$  thickness to capture roughly a single-cell layer. As the Stereo-seq is  
148 based on DNA nanoball (DNB) sequencing technology (Porreca, 2010), for which each  
149 DNB spot on the chip is 220 nm in diameter and the center-to-center distance of two  
150 adjacent spots is 500 or 715 nm, we were able to capture transcripts at sub-cellular level  
151 (Figure 1A and Figure S1A).

152 We then attempted to define single cells on tissue sections by taking the advantage  
153 of the nucleic acid staining on cryosections to highlight the nucleus (Figure 1B), in which  
154 freshly transcribed mRNAs undergoing mRNA processing, including intron splicing are  
155 enriched (Gaidatzis et al., 2015; Gray et al., 2014; Zeisel et al., 2011). Indeed, intron-  
156 containing unspliced-transcript enriched areas overlapped nicely with stained nucleic acid  
157 signals, but are separated from spliced-transcript covered regions (Figure 1B, left panels),  
158 suggesting that the image of nucleic acid staining can be used to define the nucleus  
159 region. Inspired by this fact, we further employed watershed algorithm to our stereo-seq  
160 data to isolate the transcriptome in each DNA-staining defined area (Figure 1B, right  
161 panels), thus generating the spatial transcriptomic atlas of axolotl telencephalon at single-  
162 nucleus resolution. Each nucleus contains about 850 DNB spots, 6297 UMIs and 1682  
163 genes on average (Table S1 and Figure S3 A-B). This high-resolution tool empowers us  
164 to delicately investigate diverse expression patterns of critical genes, with high similarity  
165 to *in situ* hybridization results (Figure S1B).

166 Using these data, we first performed unsupervised clustering analysis that considers  
167 both physical positions and global gene expression of individually deduced nucleus  
168 (details in methods). In total, we obtained six clusters of cells that show a patterned  
169 distribution on the brain section (Figure 1C), consistent with previous anatomical  
170 characterization of axolotl telencephalon, including ventricular zone (VZ), dorsal pallium  
171 (DP), medial pallium (MP), lateral pallium (LP), striatum and septum (González et al.,  
172 2017; Joven and Simon, 2018; Lazcano et al., 2021). To comprehensively dissect the cell  
173 type composition in the entire brain section, we next conducted unsupervised clustering  
174 analysis solely based on gene expression with Seurat (v4.0.2) (Hao et al., 2021). To this  
175 end, we categorized all identified nucleus into 15 cell types (Figure 1D) and further  
176 mapped them onto the telencephalon section according to the spatial information of each  
177 cell (Figure 1E). Cell identities were then determined by known marker genes in other  
178 species (Figure S2A; Table S2), and the spatial location of each cell type was further  
179 confirmed with the marker gene distribution results, which show great similarity to *in situ*  
180 hybridization (ISH) data (Figure S2B). For example, Stereo-seq based expression of  
181 classical excitatory neuron marker *Neurod6*, inhibitory neuron marker *Gad1* and RGC  
182 marker *Gfap* are almost identical to *in situ* hybridization results (Figure 1F).

183 As expected, all major brain cell types are present in distinct locations (Figure 1E  
184 and Figure S3C-E). Of note, there are three types of excitatory neurons enriched in  
185 pallium, named as dorsal pallium excitatory neuron (DPEX), medial pallium excitatory  
186 neuron (MPEX) and *Nptx*<sup>+</sup> lateral pallium excitatory neuron (NPTXEX); In contrast, four  
187 types of inhibitory neurons, including striatum inhibitory neuron (StriatumIN), *Scgn*<sup>+</sup>  
188 inhibitory neuron (SCGNIN), medium spiny neuron (MSN) and basket cell (BKC) are



189 enriched in striatum or septum regions, physically separated from regions of excitatory  
190 neurons (Figure 1E). Remarkably, a fifth type of inhibitory neurons, *Sst*<sup>+</sup> inhibitory neuron  
191 (SSTIN), were individually dispersed within the pallium regions, intermingled with  
192 excitatory neurons (Figure 1G and Figure S3E), consistent with previous study that *Sst*  
193 was expressed in scattered cells across DP and MP (Amamoto et al., 2016). Again, such  
194 exquisite distinction of cell types in space strongly endorsed the capability of Stereo-seq  
195 in realizing spatial transcriptome profiling of individual nuclei.

196 During brain development, neurons are formed by differentiation of neuron stem cells,  
197 or RGCs specifically for axolotl, which are also believed as the major contributing cell  
198 population for regeneration (Maden et al., 2013; Noctor et al., 2001). While it is known  
199 that axolotl RGCs mostly reside in the VZ region, we identified three clusters of cells  
200 located separately along the VZ regions with commonly high expression level of RGC  
201 specific markers genes, including *Sox2*, *Gfap*, *Nes*, *Vim*, *Fabp7* and *Slc1a3* (Figure S4),  
202 therefore named as *Wnt*<sup>+</sup> radial glial cell (WNTRGC) along the medial pallium side, *Sfrp1*<sup>+</sup>  
203 radial glial cell (SFRP1RGC) and *Ccnd1*<sup>+</sup> radial glial cell (CCND1RGC) according to their  
204 unique marker gene expression (Figure 1E). The distinct gene expression profile of each  
205 RGC type may suggest discrete functions. Indeed, CCND1RGCs highly express *Nes*,  
206 *Sox2*, cell cycle and ribosome related genes (Figure S2A; Table S2), suggesting they are  
207 potentially the progenitor cells for adult axolotl telencephalon maintenance (Barna, 2013;  
208 Bernal and Arranz, 2018; Calegari et al., 2005; Eming et al., 2014; Niu et al., 2015).

209 Other cell types identified included cholinergic, monoaminergic and peptidergic  
210 neuron (CMPN) and telecephalic neuroblast (NBL) in the septum, choroid plexus cells

211 (CP) and vascular leptomeningeal cells in the out layer of the section (VLMC) (Figure 1E  
212 and Figure S2A). Altogether, with high-resolution stereo-seq, we provide a spatial cell  
213 atlas of axolotl telencephalon and transcriptome information for each cell, laying a cellular  
214 and molecular foundation for further development and regeneration studies. The  
215 interactive data portal can be browsed at <https://db.cngb.org/stomics/artista>.

## 216 **Cellular dynamics of RGCs throughout axolotl telencephalon development**

217 It has been reported that in axolotls, RGCs in VZ region are responsible for brain  
218 development and regeneration, up on receiving stage-dependent developmental and  
219 injury cue (Amamoto et al., 2016; Maden et al., 2013). To more comprehensively  
220 understand cellular dynamics occurred during axolotl brain development, we carried out  
221 a series of spatial transcriptome analyses on sections of developmental (stage 44, 54,  
222 and 57), juvenile, adult, and metamorphosed axolotl forebrains (Figure 2A). Unsupervised  
223 clustering analysis based on gene expression with Seurat was applied to each section  
224 and in total 33 cell types were annotated coordinately across sections by their  
225 differentially expressed marker genes (Figure 2A, Figure S5A-C and S6; Table S1 and  
226 Table S2). In addition to the cell types identified in adult telencephalon (Figure 1), we also  
227 discovered 14 immature/intermediate cell types containing marker genes of both  
228 progenitor and differentiated cells (Figure 2A-B).

229 Most notably, we found a subpopulation of RGCs present in dominance throughout  
230 developmental stages, but were decreased in number and disappeared after juvenile  
231 stage (Figure 2A-B and Figure S7-S11). They expressed embryonic markers such as  
232 *Fzd5* and *Sox1*, and were named as development related RGCs (DRGCs). SFRP1RGCs,

233 WNTRGCs and CCND1RGCs defined in adult telencephalon started to be detected since  
234 stage 54 and gradually became dominant RGC populations in designated locations from  
235 juvenile stage (Figure 2A-B). Along with DRGCs, immature neurons that expressed  
236 neuron lineage markers and *Stmn2*, *Tubb6*, *Dcx* were also detected at early  
237 developmental stages, the number of which progressively declined from stages 44 to 57  
238 (Figure 2A-B and Figure S7-S11). Interestingly, the developmental intermediate  
239 progenitor cells (DIPCs) that co-expressed both RGC and immature neuron markers were  
240 discovered with similar temporal pattern as DRGCs and immature neurons (Figure 2A-B  
241 and Figure S7-S11), confirming the potential cell transition from RGCs to immature  
242 neurons as previously suggested (Noctor et al., 2001). In contrast to these developmental  
243 cell types, mature neurons, including subtypes of excitatory neurons and inhibitory  
244 neurons were gradually enriched, and the total number was increased from juvenile stage  
245 (Figure 2A-B and Figure S7-S11). This result nicely recapitulates the cellular dynamics of  
246 telencephalon development reported previously (Joven and Simon, 2018), suggesting  
247 that neurogenesis of axolotl telencephalon massively declines from juvenile stage, after  
248 which inactive SFRP1RGCs and WNTTGCs become WNTRGC made up the dominant  
249 population of RGCs, while DRGCs like CCND1RGCs only took up a small portion.

250 To further characterize the stemness and proliferation activity of RGCs in different  
251 VZ regions along the development, we analyzed the expression level of composite gene  
252 modules defining neural stemness, cell cycle and translation activity (methods, Table S3),  
253 all of which can help reveal the diverse aspects of stem cells (Figure 2C) (Fu et al., 2021;  
254 Temple, 2001). Overall, cells expressing high level of three gene modules were basically  
255 overlapped, distributed around the VZ, yet extended to the peripheral regions during early

256 developmental stages, consistent with the fact of fast expansion of the brain size yet less  
257 neuron maturation in axolotl (Figure 2C) (Schreckenber and Jacobson, 1975). Started  
258 from juvenile stage, cells positive for neural stemness, cell cycle and translation module  
259 gene expression significantly dropped in number and became restricted to the VZ region.  
260 Eventually, these active progenitor cells were enriched to the ventral area of the VZ region  
261 in adult, suggesting cells in this areas are responsible for adult brain maintenance similar  
262 to previous reports (Maden et al., 2013).

263 In contrast to the axolotl, the mouse has very limited regenerative ability upon brain  
264 cortex injury. To gain more insights into the molecular differences in stem cells between  
265 the axolotl and mouse brain, we compared the cellular and molecular dynamics of NSCs  
266 in mouse to that of RGCs in developing axolotl brains. Previously published single-cell  
267 RNA-seq data of developing mouse neocortex from Paola Arlotta lab were integrated with  
268 Stereo-seq data of developing axolotl telencephalons via Seurat (Figure S12 A-B) (Di  
269 Bella et al., 2021). Identified mouse NSCs and the combination of RGCs and DIPCs in  
270 axolotl were then compared. Interestingly, RGCs were relatively abundant in the VZ of  
271 axolotl brains, and their ratio sustained roughly even in adulthood (Figure 2D). Moreover,  
272 axolotl RGCs constantly expressed neural stemness module throughout the entire  
273 developmental and adult stages (Figure 2E). In contrast, NSCs in mouse brain gradually  
274 declined at later embryonic stages as well as after birth, accompanied with the degressive  
275 activity of neural stemness module (Figure 2D-E). These differences including the number  
276 and regeneration potential of stem cells between axolotl and mouse may partially explain  
277 the high regenerative capability of axolotl brains, which is absent in adult mammals.

## 278 **Injury specific RGCs contribute to pallium regeneration in axolotl**

279 While axolotls harbor amazing regenerative capacity of the brain upon injury (Amamoto  
280 et al., 2016), the type of cells and their origins, as well as the underlying molecular events  
281 that direct the regeneration process and rebuild the exon network to recover the function  
282 are largely unknown. We next applied Stereo-seq to dissect the cellular and molecular  
283 dynamics during brain regeneration. Using a brain regeneration model established  
284 previously (Amamoto et al., 2016), in which a reproducible portion of the dorsal pallium in  
285 left telencephalic hemisphere of 11 cm length axolotl was removed by surgery, we  
286 collected brain tissues at 2, 5, 10, 15, 20, 30 and 60 days post injury (DPI) for Stereo-seq  
287 analysis, respectively (Figure 3A). Such efforts allowed us to investigate both immediate  
288 wound responses and chronic tissue regeneration process. By unsupervised clustering  
289 analysis based on gene expression with Seurat to each section (Figure S13A-D), we  
290 annotated cell types coordinately across sections by marker genes used in the  
291 developmental analysis (Figure S14). In total, 23 clusters were identified, including injury-  
292 specific cell populations that were not present during development (Figure 3A and Figure  
293 S13D). In line with previous reports that the injured site can be recovered to undetectable  
294 level in morphology in about 4 to 5 weeks (Amamoto et al., 2016), our data further  
295 revealed both cell types and their spatial distribution were basically recovered at 60 DPI  
296 in comparison with uninjured and the intact lateral side of injured brains (Figure 3A and  
297 Figure S13D).

298 Interestingly, we captured a new type of RGC enriched at the edge of wound region,  
299 but not in the intact right side of telencephalon sections from 2 to 20 DPI (Figure 3A-B

300 and Figure S15A-B). This injury specific RGCs featured the high expression level of  
301 genes, such as *Nes*, *Krt18*, *Tnc* and *Ccna2* (Figure 3A-B and Figure S15C; Table S2),  
302 which indicate their stem cell state and high proliferation activity, and we therefore named  
303 this RGC type as reactivate RGCs (REARGCs). Strikingly, the number of REARGCs  
304 appeared to be significantly increased in the VZ along the medium and lateral pallium  
305 region and eventually covered the whole wound area around 20 DPI, and disappeared  
306 after 30 DPI (Figure 3B, Figure S13D and Figure S16-S22). Unlike brain wound healing  
307 process in mammals, during which microglia and macrophages are the first line of cell  
308 types responsible for injury site filling (Li et al., 2021b), REARGCs appeared to be the  
309 dominant cell type in the wound area between 2 and 20 DPI, suggesting they may be  
310 involved in multiple aspects of tissue regeneration process (Figure 3A-B).

311 Indeed, the detailed transcriptome examination of REARGCs from 2 to 20 DPI  
312 showed two waves of functional module induction. The first is early and transient  
313 expression of wound response related genes (Module 1), including *Tgfb1*, *Runx1*, *Tnc*,  
314 *Cxcr4* and *Hmox1* at 2 DPI at the wound edge, which were rapidly downregulated  
315 thereafter (Figure 3C-D). the second wave featured by continuous induction of  
316 proliferation related genes (Module 2) in REARGCs from 10 to 20 DPI when REARGCs  
317 and immature NPTXEXs expanded in number (Figure 3C-D and Figure S13D; Table S4).  
318 The proliferation feature of REARGCs was further confirmed by EDU staining on sections  
319 of 10 DPI and 15 DPI, which showed significant enrichment of EDU positive cells  
320 extended from injury site along the VZ region, in comparison with uninjured site (Figure  
321 3E). In contrast, other RGC types retained a moderate and constant expression level of  
322 cycling related genes on average throughout regeneration stages. Altogether, our findings

323 here suggest that REARGCs may play dual roles in both early inflammatory response to  
324 the wound and then switch to cell propagation to cover the injured region.

325 **Cellular dynamics from REARGCs to NPTXEXs in injury-induced pallium**  
326 **regeneration**

327 The above results elicit an intriguing hypothesis that REARGCs, but not other RGCs, are  
328 the major progenitor cell population that differentiates and restores lost neurons,  
329 particularly NPTXEXs. If so, we would expect to capture cell clusters that are between  
330 REARGCs and NPTXEXs in terms of differentiation state. To better test the hypothesis  
331 and to avoid that our fine sectioning procedure may not capture all types of cells within a  
332 single section, we chose to dissect the regenerating telencephalon at 15 DPI along the  
333 rostral-caudal axis and made three more consecutive sections from wound center  
334 towards the caudal direction in addition to the 15 DPI-1 section shown in Fig 3, including  
335 one on the wound edge and two more sections at the closed area for stereo-seq analysis  
336 (Figure 4A).

337 By combining data of all four sections, a total of 25 cell types were identified (Figure  
338 4A, Figure S23A-D and S24). NPTXEXs were the major cell population lost at the lesion  
339 of the injured hemisphere compared to uninjured lateral side in 15 DPI-1 to 4 sections.  
340 REARGCs covered the injury regions in all 4 sections (Figure 3A, Figure 4A and Figure  
341 S23D). Interestingly, the NPTXEX population showed a high-to-low spatial gradient from  
342 the remote regions in 15 DPI-4 section to the center of the injured area in 15 DPI-1 section  
343 (Figure 3A, Figure 4A and Figure S23D), which is consistent with previous micro-CT  
344 scanned axolotl regeneration data (Amamoto et al., 2016). These data suggested that the

345 reconstitution of lost neurons probably occurs in accompany with the conjunction of injury  
346 edges, the process of which may initiate from the peripheral region towards the center of  
347 incision.

348 We then explored how lost NPTXEXs were restored around the injury site. As  
349 expected, the newly formed NPTXEXs in 15 DPI-4 section were nicely located adjacent  
350 to immature NPTXEXs and REARGCs, suggesting a possible transition between these  
351 cell types (Figure 4A). Excitingly, a regenerative specific cluster of cells were identified in  
352 an intermediate state between REARGCs and immature NPTXEXs and therefore named  
353 as regeneration intermediate progenitor cells 1 (RIPC1) (Figure 4A; Table S2). They  
354 expressed both REARGC markers including *Vim*, *Nes*, *Krt18*, *S100a10* and immature  
355 NPTXEX markers including *Ankrd1*, *Stmn4*, *Nptx1* (Figure 4B-C). Expression of cyclin  
356 inhibitors *Cdkn1a* and *Cdkn1c* was upregulated in RIPC1 and further upregulated in  
357 immature NPTXEXs compared to REARGCs (Dutto et al., 2015; Mademtzoglou et al.,  
358 2018), suggesting the proliferation is slowing down along the potential transition axis of  
359 REARGC-DIPC1-immature NPTXEX (Figure 4B-C). Thus, our data revealed four nicely  
360 adjacent cell layers of REARGCs, RIPC1s, immature NPTXEXs, and mature NPTXEXs,  
361 respectively (Figure 4D and Figure S25-S27), inspiring us with a potential lineage transition  
362 for neurogenesis.

363 Indeed, cell type based (Figure 4E) and pseudotime based (Figure 4F) RNA velocity  
364 analyses on the 15 DPI-4 section also suggested a similar putative lineage transition from  
365 REARGCs to RIPC1s, then to immature NPTXEXs and eventually NPTXEXs. Similar  
366 observation was made on sections of 15 DPI-2 and -3, too (Figure S28A-C and Figure



367 S28 F-H). To dissect our velocity results in more details, we calculated the genes that  
368 show patterned expression change along the pseudotime axis (Figure 4G, Figure S28D  
369 and I), which were consistent with their gene function in the putative lineage transition,  
370 such like the descending of *Nes* and the ascending of *Cdkn1c* (Figure 4H, Figure S28E  
371 and J). In summary, our results imply a potential scenario that REARGCs proliferate to  
372 cover the wounding site of injured axolotl telencephalon, then convert or differentiate into  
373 RIPCes and eventually produce immature neurons and reconstruct the lost tissue.

#### 374 **Comparison of the NPTXEX formation processes in development and regeneration**

375 The nicely ordered cell layer distribution and potential lineage transition discovered at  
376 injury site are similar to those in the developmental brain, thus prompting us to further  
377 compare these two processes. Notably, DRGCs, DIPCes and immature NPTXEXs arrayed  
378 from VZ to pallium region were observed at as early as stage 44 (Figure 5B). When the  
379 mature NPTXEXs appeared at stage 57, four nicely adjacent cell layers of DRGCs,  
380 RIPC1s, immature NPTXEXs, and mature NPTXEXs were observed with high similarity  
381 to that in 15 DPI-4 section (Figure 5A-B), indicating a possible recapitulation of NPTXEX  
382 development during the injury-induced regeneration. To further test this possibility, all  
383 types of RGCs in the dorsal left telencephalon from developmental stage 44, 54 and 57,  
384 as well as 15 DPI-4 and control section in injury model were pooled, and applied to  
385 correlation analysis. Indeed, the results showed the gene expression pattern of  
386 REARGCs is mostly correlated with DRGCs in Stage 57, rather than other RGC types  
387 from the same section (Figure 5C). In addition, the spatial expression heatmap of key  
388 markers such as *Nes*, *Nptx1* and *Cdkn1c* are much alike between 15 DPI-4 and Stage 57

389 (Figure 4C, Figure 5D-E, Figure S29 A-C). The RNA velocity analysis has simulated  
390 parallel lineage transition trajectories to generate NPTXEXs in developmental and  
391 regenerative processes, from RGCs to IPCs to immature neurons to mature neurons  
392 (Figure 4E, Figure 5F-H and Figure S29 A-C).

393 We further used potential DRGC to NPTXEX transition at Stage 57 to represent  
394 developmental neurogenesis, and potential REARGC to NPTXEX transition of 15 DPI-4  
395 to represent the regenerative neurogenesis, and comprehensively assess the molecular  
396 dynamics of these two potential transition processes. We examined the gene expression  
397 patterns in the four related cell types along each process, and classified eight groups of  
398 gene expression patterns showing similar or opposite trends (Figure 5I; Table S5).  
399 Pathway enrichment analysis on these patterned expressing genes revealed that in both  
400 development and regeneration, pathways involved in neuronal differentiation, migration,  
401 maturation, communication and synaptic activities were up-regulated. However,  
402 pathways related to proliferation, cell cycle progression and factors promoting these  
403 processes such as translation initiation, RNA splicing were both down-regulated (Figure  
404 5J). These results fit the expected notion that the stemness and proliferation were  
405 declined with the onset of neurogenesis (Figure 5J). Interestingly, protein ubiquitination,  
406 chromatin organization, mTOR signaling and transcriptional regulation by TP53 were  
407 found specifically upregulated in regeneration, suggesting possible immune and  
408 metabolism strategies to control the rapid cell growth during regeneration. In addition, we  
409 also observed a regeneration specific rise in activities of autophagy, as well as a  
410 regeneration specific decline in activities of response to wound and stress (Figure 5J),  
411 reflecting a possible transition of molecular machinery from wound response in REARGC

412 to neuron regeneration. Besides the enriched pathways, we also identified hundreds of  
413 regenerative specific genes (Table S6). Overall, our data suggested that regeneration to  
414 certain extent is the re-initiation of development, but also exhibits its unique features.  
415 Though majority of them showed expression pattern as expected, such as *JunD* and *Tnc*  
416 that are known to be involved in nervous system regeneration (Chen et al., 2010; Raivich  
417 et al., 2004), several unexpected or functionally unknown genes were discovered, such  
418 as filament reorganizational *Krt18*, protein phosphorylation related *S100a10*, tumor  
419 suppressor *Tagln2* and *Tnfsf10*, and endothelial cell activator *Ankrd1* (Figure S30), which  
420 may be interesting targets in following functional studies of brain regeneration.

421 Altogether, our detailed comparison of spatial transcriptomes revealed great  
422 similarity in both spatial distribution and enriched molecular pathway between  
423 development and regeneration, suggesting regeneration of axolotl brain may partially  
424 recapitulate neurogenesis in brain development through differentiation of stem/progenitor  
425 cells with similar molecular regulations.

## 426 **DISCUSSION**

### 427 **Dynamic cell atlas of axolotl telencephalon through development and regeneration** 428 **at single cell resolution**

429 The goal of regenerative medicine in the brain is to restore not only the intricate tissue  
430 architecture and cell composition of the injured region, but also the molecular and cellular  
431 homeostasis and functions of recovered brains. While we have learned much about the  
432 natural regeneration process by studying various types of animal models, especially the  
433 highly regenerative fish and axolotls, key questions including whether the brain of these

434 models can be fully regenerated both anatomically and functionally, how progenitor cells  
435 take the regenerative responsibility and how gene activity orchestrates cellular responses  
436 upon injury remain unanswered. To this end, a complete set of knowledge regarding the  
437 cellular and molecular profiling during development and regeneration in regenerative  
438 models is needed in the first place. Though a cellular map of the pallium has been  
439 previously built by *in situ* hybridization with a few marker genes in axolotls (Amamoto et  
440 al., 2016), more comprehensive cell type identification and their spatial organization and  
441 gene activity dynamics in the context of development and regeneration for mechanistic  
442 investigation is still lacking.

443 Taking the advantage of our Stereo-seq and the single nucleus extraction method  
444 developed in this study, we successfully established the first single cell level spatial-  
445 transcriptomic atlas of axolotl telencephalon, a marked advancement in resolution and  
446 throughput in comparison with the brain atlas data in previous studies (Maynard et al.,  
447 2021; Ortiz et al., 2020). The single cell level transcriptomics displayed on Stereo-seq  
448 sections also empowered us to elucidate the spatial-temporal relationship between  
449 diverse cell types in regeneration, between development and regeneration, the  
450 knowledge of which is essential but not yet clear. Furthermore, the large size of our  
451 stereo-seq chip allowed us to capture the entire telencephalon on the same section, with  
452 the left hemisphere injured but the right one uninjured for direct comparison. With these  
453 technical advantages, our data provided inspiring information to several important  
454 questions in brain regeneration, revealing the key cell populations and their dynamics in  
455 the regeneration niche, suggesting a possible strategy for lost tissue reconstitution by

456 lineage-transition from injury-specific RGCs, and elucidating that the injury-induced  
457 regeneration partially recapitulate the neuron developmental hierarchy.

458 **Diversification of RGC subtypes in VZ region through development and**  
459 **identification of transient activated RGCs involved in brain regeneration**

460 RGCs are thought to be ancestor cells that give rise to all cells in brain development  
461 and maintained in the VZ region of adult amphibian, featuring by positive staining of BrdU  
462 (Joven et al., 2018; Kirkham et al., 2014). Accordingly, four subtypes of RGCs are  
463 identified in our study in normal axolotl telencephalon development and maturation.  
464 DRGCs that are dominantly distributed along VZ during developmental stages, are shown  
465 to be gradually substituted by three locally restricted RGC subtypes (Figure 2A-B),  
466 indicating a possible lineage maturation trace of these endogenous neural progenitor cells.  
467 Though a decrease of early embryonic markers, the three RGC subtypes in homeostasis  
468 retained their feature of NSCs and cell cycle markers, which show similarity to the  
469 ependymogial cells and radial glial cells previously identified in newts and zebrafish,  
470 respectively (Lust and Tanaka, 2019). In the red spotted newts, two types of  
471 ependymogial cells, quiescent type I ependymogial cells and proliferating type II  
472 ependymogial cells, have been reported unevenly distributed along ventricle (Berg et al.,  
473 2010; Kirkham et al., 2014). In contrast, we diversified the RGCs in hemostasis based on  
474 a combination of whole transcriptome features with their specific localizations, instead of  
475 mainly on proliferation status (Figure 2A), thus leading to different classification of RGCs  
476 along VZ region. The CCND1RGC, one of the three RGC subtypes in homeostasis stages,  
477 is characterized with high cycling gene expression. It is majorly distributed in the VZ

478 region adjacent to the dorsal pallium and to the bed nucleus of the stria terminalis region  
479 defined as proliferative hot spots in other salamander species (Kirkham et al., 2014) (Berg  
480 et al., 2010), raising the possibility that the CCND1RGCs may share similarity with  
481 previously identified type II ependymogial cells in these spots.

482       Upon injury, the amphibian brain regeneration is accomplished mainly by resident  
483 RGCs/ependymogial cells through activation and differentiation in response to  
484 environmental cues (Berg et al., 2010; Joven et al., 2018; Kirkham et al., 2014), yet how  
485 such sequential process is regulated and if other types of cells participate remains largely  
486 elusive. By identification of the REARGC and presentation of its dynamic regenerative  
487 function, our work not only support the injury-specific appearance of cells with elevated  
488 proliferation capacity around the lesion sites (Amamoto et al., 2016; Kirkham et al., 2014),  
489 but also indicate that these amplifying RGCs may serve as the cell origin of de novo  
490 neurogenesis (Amamoto et al., 2016; Berg et al., 2010; Kirkham et al., 2014).

491 **Regeneration through REARGCs largely mimics early telencephalon development**  
492 **with DRGC in axolotl**

493       More intriguingly, by comparing our regeneration and development data, it becomes  
494 quite clear that REARGCs are in a state similar to DRGCs in terms of gene expression  
495 profile and pathway enrichment (Figure 5C and 5J), such as the elevated expression of  
496 translation related genes, the typical characteristic of stem cell undergoing active  
497 proliferation (Baser et al., 2017). As DRGCs appear from the earliest stage of  
498 development we sampled, and presumably give rise to other RGC types and neurons in  
499 adulthood, it represents a more primitive type of stem cells with higher multipotency. On

500 the other hand, since DRGCs appear to be consumed in adulthood according to our data,  
501 it is mostly likely that REARGCs are originated from resident adult RGCs by  
502 reprogramming, though it remains to be determined which type of RGCs are activated  
503 and reprogrammed to REARGCs.

504 As previously suggested, a few possible REARGC origins exist (Amamoto et al.,  
505 2016; Berg et al., 2010; Kirkham et al., 2014). The first is the local WNTRGCs or  
506 SFRP1RGCs at the lesion site that respond to injury and immediately converted to  
507 REARGCs for early wound healing response; The second likely origin is CCND1RGCs,  
508 which might be the previously defined proliferative hot spot RGCs responsible for brain  
509 neuron maintenance in homeostasis state (Berg et al., 2010; Kirkham et al., 2014). It is  
510 possible that REARGCs are directly converted from CCND1RGCs in the VZ region  
511 adjacent to the dorsal pallium, where the incision takes place, or originate from ventral  
512 CCND1RGCs migrating to the injury site within two days (Figure 3B), the evidence of  
513 which requires further investigations. It is of note that at 10 and 15 DPI, more RGCs at  
514 the wound area harbor high EdU labeling activity than that at the VZ region (Figure 3E),  
515 suggesting REARGCs may locally replenish its own population, consistent with previous  
516 reports (Amamoto et al., 2016). In any case, future VZ-region specific labeling or  
517 functional perturbation assay are required to eventually elucidate how RGCs at different  
518 regions function during regeneration.

### 519 **Comparison of molecular and cellular features between axolotl brain regeneration** 520 **and mammalian brain injury recovery**

521 Inflammation/immune-responses have been reported to be critical to lead to a  
522 successful regeneration (Kyritsis et al., 2012). Unlike the axolotl, lesion in mammalian

523 adult brains often leads to tissue loss and cystic scar formation, with very limited functional  
524 recovery (Hagberg et al., 2012). Only low-cycling/quiescent NSCs are identified in defined  
525 areas of postnatal mammalian brains, and they are generally difficult to be activated to  
526 give rise to proper cell types to repair brain lesion (Furutachi et al., 2015; Llorens-  
527 Bobadilla et al., 2015; Yang et al., 2007). The pro-inflammatory molecules secreted at the  
528 lesion following hypoxia insult are thought to be detrimental to neurogenesis in mammals,  
529 and such negative effects are elevated by the long-term persistence of glial scar (Silver  
530 and Miller, 2004). Interestingly, a transit wave of wound-response is also observed in  
531 REARGCs at the edge of the lesion site during cortex regeneration, which represented  
532 by the upregulation of inflammation and hypoxia related genes at 2 and 5 DPI (Figure 3C-  
533 D). It suggests a similar early response in axolotl as those in mammalian system. In  
534 contrast to the sustained inflammation in injured mammalian brain, REARGCs in the  
535 injured axolotl pallium decrease their activity in wound-response and transform their  
536 molecular features into proliferation around 10 DPI (Figure 3C-E), raising the possibility  
537 that they may start to function as NSCs to initiate de novo neurogenesis, the process of  
538 which is further proved by the nicely arranged cell layers re-exhibiting in the  
539 developmental process (Figure 5). Based on these observations, we predicted that axolotl  
540 REARGCs may play dual roles in injury-induced brain regeneration: firstly, respond to  
541 early wound insults and then expand to reconstitute lost neurons. The injury-specific  
542 REARGC population and the well-controlled transition between two functions may provide  
543 key mechanism to balance inflammation versus neurogenesis, which endows axolotl the  
544 capacity of neuronal regeneration.



545 In summary, our work provides the most comprehensive atlas of the axolotl  
546 telencephalon to date. Such large-scale efforts not only prompt to redefine the  
547 subpopulation of radial glial cells based on whole transcriptome feature, but also start to  
548 reveal their dynamic transition and functions in development and regeneration with  
549 significant similarity at molecular level. In the future, advanced technology with higher  
550 resolution and RNA capture capability, as well as accurate cell membrane border  
551 definition strategies, will enable the identification of cell types and transcript features in a  
552 more accurate way. Moreover, as injury-induced regeneration would be joint behaviors in  
553 different regions, including cells from the olfactory bulb, yet limitation may exist for full  
554 recovery (Maden et al., 2013) (Amamoto et al., 2016). Therefore, it could be of great  
555 interest in the future study to perform continues sections that enable 3D reconstruction of  
556 multiple brain regions in a longer regeneration time, which would help display the  
557 networks of neuron projections and connections during regeneration and to investigate  
558 whether they are rebuild completely. 3D map can also let us investigate whether  
559 molecular and cellular cues of regeneration are polarized along rostro-caudal axis.

560

## 561 REFERENCES

562

- 563 Altschul, S.F., Madden, T.L., Schäffer, A.A., Zhang, J., Zhang, Z., Miller, W., and  
564 Lipman, D.J. (1997). Gapped BLAST and PSI-BLAST: a new generation of protein  
565 database search programs. *Nucleic acids research* 25, 3389-3402.
- 566 Amamoto, R., Huerta, V.G., Takahashi, E., Dai, G., Grant, A.K., Fu, Z., and Arlotta, P.  
567 (2016). Adult axolotls can regenerate original neuronal diversity in response to brain  
568 injury. *eLife* 5.
- 569 Barna, M. (2013). Ribosomes take control. *Proceedings of the National Academy of  
570 Sciences of the United States of America* 110, 9-10.
- 571 Barton, R.A., and Harvey, P.H. (2000). Mosaic evolution of brain structure in mammals.  
572 *Nature* 405, 1055-1058.
- 573 Baser, A., Skabkin, M., and Martin-Villalba, A. (2017). Neural Stem Cell Activation and  
574 the Role of Protein Synthesis. *Brain Plast* 3, 27-41.
- 575 Berg, D.A., Kirkham, M., Beljajeva, A., Knapp, D., Habermann, B., Ryge, J., Tanaka,  
576 E.M., and Simon, A. (2010). Efficient regeneration by activation of neurogenesis in

577 homeostatically quiescent regions of the adult vertebrate brain. *Development* 137,  
578 4127-4134.

579 Bernal, A., and Arranz, L. (2018). Nestin-expressing progenitor cells: function, identity  
580 and therapeutic implications. *Cellular and Molecular Life Sciences* 75, 2177-2195.

581 Bullmore, E., and Sporns, O. (2012). The economy of brain network organization.  
582 *Nature Reviews Neuroscience* 13, 336-349.

583 Calegari, F., Haubensak, W., Haffner, C., and Huttner, W.B. (2005). Selective  
584 lengthening of the cell cycle in the neurogenic subpopulation of neural progenitor cells  
585 during mouse brain development. *The Journal of neuroscience : the official journal of*  
586 *the Society for Neuroscience* 25, 6533-6538.

587 Chen, A., Liao, S., Cheng, M., Ma, K., Wu, L., Lai, Y., Yang, J., Li, W., Xu, J., Hao, S.,  
588 *et al.* (2021). Large field of view-spatially resolved transcriptomics at nanoscale  
589 resolution. *bioRxiv*, 2021.2001.2017.427004.

590 Chen, J., Joon Lee, H., Jakovcevski, I., Shah, R., Bhagat, N., Loers, G., Liu, H.Y.,  
591 Meiners, S., Taschenberger, G., Kügler, S., *et al.* (2010). The extracellular matrix  
592 glycoprotein tenascin-C is beneficial for spinal cord regeneration. *Mol Ther* 18, 1769-  
593 1777.

594 Chen, K.H., Boettiger, A.N., Moffitt, J.R., Wang, S., and Zhuang, X. (2015). RNA  
595 imaging. Spatially resolved, highly multiplexed RNA profiling in single cells. *Science*  
596 (New York, NY) 348, aaa6090.

597 Di Bella, D.J., Habibi, E., Stickels, R.R., Scalia, G., Brown, J., Yadollahpour, P., Yang,  
598 S.M., Abbate, C., Biancalani, T., Macosko, E.Z., *et al.* (2021). Molecular logic of cellular  
599 diversification in the mouse cerebral cortex. *Nature* 595, 554-559.

600 Diotel, N., Lübke, L., Strähle, U., and Rastegar, S. (2020). Common and Distinct  
601 Features of Adult Neurogenesis and Regeneration in the Telencephalon of Zebrafish  
602 and Mammals. *Frontiers in neuroscience* 14, 568930.

603 Dobin, A., Davis, C.A., Schlesinger, F., Drenkow, J., Zaleski, C., Jha, S., Batut, P.,  
604 Chaisson, M., and Gingeras, T.R. (2013). STAR: ultrafast universal RNA-seq aligner.  
605 *Bioinformatics* 29, 15-21.

606 Dutto, I., Tillhon, M., Cazzalini, O., Stivala, L.A., and Prosperi, E. (2015). Biology of the  
607 cell cycle inhibitor p21(CDKN1A): molecular mechanisms and relevance in chemical  
608 toxicology. *Archives of toxicology* 89, 155-178.

609 Echeverri, K., and Tanaka, E.M. (2002). Ectoderm to mesoderm lineage switching  
610 during axolotl tail regeneration. *Science (New York, NY)* 298, 1993-1996.

611 Eming, S.A., Martin, P., and Tomic-Canic, M. (2014). Wound repair and regeneration:  
612 mechanisms, signaling, and translation. *Science translational medicine* 6, 265sr266.

613 Eng, C.-H.L., Lawson, M., Zhu, Q., Dries, R., Koulena, N., Takei, Y., Yun, J., Cronin, C.,  
614 Karp, C., Yuan, G.-C., *et al.* (2019). Transcriptome-scale super-resolved imaging in  
615 tissues by RNA seqFISH+. *Nature* 568, 235-239.

616 Font, E., Desfilis, E., Pérez-Cañellas, M.M., and García-Verdugo, J.M. (2001).  
617 Neurogenesis and neuronal regeneration in the adult reptilian brain. *Brain, behavior and*  
618 *evolution* 58, 276-295.

619 Frackowiak, R.S.J. (2004). Introduction. In *Human Brain Function (Second Edition)*,  
620 R.S.J. Frackowiak, K.J. Friston, C.D. Frith, R.J. Dolan, C.J. Price, S. Zeki, J.T.  
621 Ashburner, and W.D. Penny, eds. (Burlington: Academic Press), pp. xv-xvi.

- 622 Fu, J., Warmflash, A., and Lutolf, M.P. (2021). Stem-cell-based embryo models for  
623 fundamental research and translation. *Nature Materials* 20, 132-144.
- 624 Furutachi, S., Miya, H., Watanabe, T., Kawai, H., Yamasaki, N., Harada, Y., Imayoshi,  
625 I., Nelson, M., Nakayama, K.I., Hirabayashi, Y., *et al.* (2015). Slowly dividing neural  
626 progenitors are an embryonic origin of adult neural stem cells. *Nat Neurosci* 18, 657-  
627 665.
- 628 Gaiano, N., Nye, J.S., and Fishell, G. (2000). Radial glial identity is promoted by Notch1  
629 signaling in the murine forebrain. *Neuron* 26, 395-404.
- 630 Gaidatzis, D., Burger, L., Florescu, M., and Stadler, M.B. (2015). Analysis of intronic  
631 and exonic reads in RNA-seq data characterizes transcriptional and post-transcriptional  
632 regulation. *Nature biotechnology* 33, 722-729.
- 633 Gerber, T., Murawala, P., Knapp, D., Masselink, W., Schuez, M., Hermann, S., Gac-  
634 Santel, M., Nowoshilow, S., Kageyama, J., Khattak, S., *et al.* (2018). Single-cell analysis  
635 uncovers convergence of cell identities during axolotl limb regeneration. *Science (New*  
636 *York, NY)* 362.
- 637 González, A., López, J.M., Morona, R., and Moreno, N. (2017). The Organization of the  
638 Central Nervous System of Amphibians. In *Evolution of Nervous Systems*, pp. 141-170.
- 639 Gray, J.M., Harmin, D.A., Boswell, S.A., Cloonan, N., Mullen, T.E., Ling, J.J., Miller, N.,  
640 Kuersten, S., Ma, Y.C., McCarroll, S.A., *et al.* (2014). SnapShot-Seq: a method for  
641 extracting genome-wide, in vivo mRNA dynamics from a single total RNA sample. *PLoS*  
642 *one* 9, e89673.
- 643 Hagberg, H., Gressens, P., and Mallard, C. (2012). Inflammation during fetal and  
644 neonatal life: implications for neurologic and neuropsychiatric disease in children and  
645 adults. *Ann Neurol* 71, 444-457.
- 646 Hansen, D.V., Lui, J.H., Parker, P.R.L., and Kriegstein, A.R. (2010). Neurogenic radial  
647 glia in the outer subventricular zone of human neocortex. *Nature* 464, 554-561.
- 648 Hao, Y., Hao, S., Andersen-Nissen, E., Mauck, W.M., 3rd, Zheng, S., Butler, A., Lee,  
649 M.J., Wilk, A.J., Darby, C., Zager, M., *et al.* (2021). Integrated analysis of multimodal  
650 single-cell data. *Cell* 184, 3573-3587.e3529.
- 651 Herrick, C.J. (1948). *The brain of the tiger salamander, Ambystoma tigrinum* (Chicago,  
652 IL, US: University of Chicago Press).
- 653 Joven, A., and Simon, A. (2018). Homeostatic and regenerative neurogenesis in  
654 salamanders. *Progress in neurobiology* 170, 81-98.
- 655 Joven, A., Wang, H., Pinheiro, T., Hameed, L.S., Belnoue, L., and Simon, A. (2018).  
656 Cellular basis of brain maturation and acquisition of complex behaviors in salamanders.  
657 *Development (Cambridge, England)* 145.
- 658 Kaslin, J., Ganz, J., and Brand, M. (2008). Proliferation, neurogenesis and regeneration  
659 in the non-mammalian vertebrate brain. *Philosophical transactions of the Royal Society*  
660 *of London Series B, Biological sciences* 363, 101-122.
- 661 Kirkham, M., Hameed, L.S., Berg, D.A., Wang, H., and Simon, A. (2014). Progenitor cell  
662 dynamics in the Newt Telencephalon during homeostasis and neuronal regeneration.  
663 *Stem Cell Reports* 2, 507-519.
- 664 Kishimoto, N., Shimizu, K., and Sawamoto, K. (2012). Neuronal regeneration in a  
665 zebrafish model of adult brain injury. *Disease models & mechanisms* 5, 200-209.

666 Kizil, C., Kyritsis, N., Dudczig, S., Kroehne, V., Freudenreich, D., Kaslin, J., and Brand,  
667 M. (2012). Regenerative Neurogenesis from Neural Progenitor Cells Requires Injury-  
668 Induced Expression of Gata3. *Developmental cell* 23, 1230-1237.

669 Kroehne, V., Freudenreich, D., Hans, S., Kaslin, J., and Brand, M. (2011). Regeneration  
670 of the adult zebrafish brain from neurogenic radial glia-type progenitors. *Development*  
671 (Cambridge, England) 138, 4831-4841.

672 Kumar, L., and M, E.F. (2007). Mfuzz: a software package for soft clustering of  
673 microarray data. *Bioinformatics* 2, 5-7.

674 Kyritsis, N., Kizil, C., Zocher, S., Kroehne, V., Kaslin, J., Freudenreich, D., Iltzsche, A.,  
675 and Brand, M. (2012). Acute inflammation initiates the regenerative response in the  
676 adult zebrafish brain. *Science (New York, NY)* 338, 1353-1356.

677 La Manno, G., Soldatov, R., Zeisel, A., Braun, E., Hochgerner, H., Petukhov, V.,  
678 Lidschreiber, K., Kastrioti, M.E., Lönnerberg, P., Furlan, A., *et al.* (2018). RNA velocity of  
679 single cells. *Nature* 560, 494-498.

680 Lazcano, I., Cisneros-Mejorado, A., Concha, L., Ortiz-Retana, J.J., Garza-Villarreal,  
681 E.A., and Orozco, A. (2021). MRI- and histologically derived neuroanatomical atlas of  
682 the *Ambystoma mexicanum* (axolotl). *Sci Rep* 11, 9850.

683 Li, H., Wei, X., Zhou, L., Zhang, W., Wang, C., Guo, Y., Li, D., Chen, J., Liu, T., Zhang,  
684 Y., *et al.* (2021a). Dynamic cell transition and immune response landscapes of axolotl  
685 limb regeneration revealed by single-cell analysis. *Protein & cell* 12, 57-66.

686 Li, Z., Xiao, J., Xu, X., Li, W., Zhong, R., Qi, L., Chen, J., Cui, G., Wang, S., Zheng, Y.,  
687 *et al.* (2021b). M-CSF, IL-6, and TGF- $\beta$  promote generation of a new subset of tissue  
688 repair macrophage for traumatic brain injury recovery. *Science advances* 7.

689 Llorens-Bobadilla, E., Zhao, S., Baser, A., Saiz-Castro, G., Zwadlo, K., and Martin-  
690 Villalba, A. (2015). Single-Cell Transcriptomics Reveals a Population of Dormant Neural  
691 Stem Cells that Become Activated upon Brain Injury. *Cell Stem Cell* 17, 329-340.

692 Lubeck, E., Coskun, A.F., Zhiyentayev, T., Ahmad, M., and Cai, L. (2014). Single-cell *in*  
693 *situ* RNA profiling by sequential hybridization. *Nature methods* 11, 360-361.

694 Lust, K., and Tanaka, E.M. (2019a). A Comparative Perspective on Brain Regeneration  
695 in Amphibians and Teleost Fish. *Dev Neurobiol* 79, 424-436.

696 Lust, K., and Tanaka, E.M. (2019b). A Comparative Perspective on Brain Regeneration  
697 in Amphibians and Teleost Fish. *Dev Neurobiol* 79, 424-436.

698 Mademtzoglou, D., Asakura, Y., Borok, M.J., Alonso-Martin, S., Mourikis, P., Kodaka,  
699 Y., Mohan, A., Asakura, A., and Relaix, F. (2018). Cellular localization of the cell cycle  
700 inhibitor Cdkn1c controls growth arrest of adult skeletal muscle stem cells. *eLife* 7.

701 Maden, M., Manwell, L.A., and Ormerod, B.K. (2013). Proliferation zones in the axolotl  
702 brain and regeneration of the telencephalon. *Neural Dev* 8, 1.

703 Malcolm Maden, L.A.M.a.B.K.O. (2013). Proliferation zones in the axolotl brain and  
704 regeneration of the telencephalon. *Neural development* 8.

705 Marx, V. (2021). Method of the Year: spatially resolved transcriptomics. *Nature methods*  
706 18, 9-14.

707 Maynard, K.R., Collado-Torres, L., Weber, L.M., Uytingco, C., Barry, B.K., Williams,  
708 S.R., Catallini, J.L., 2nd, Tran, M.N., Besich, Z., Tippani, M., *et al.* (2021a).  
709 Transcriptome-scale spatial gene expression in the human dorsolateral prefrontal  
710 cortex. *Nat Neurosci* 24, 425-436.

711 Maynard, K.R., Collado-Torres, L., Weber, L.M., Uytingco, C., Barry, B.K., Williams,  
712 S.R., Catallini, J.L., Tran, M.N., Besich, Z., Tippani, M., *et al.* (2021b). Transcriptome-  
713 scale spatial gene expression in the human dorsolateral prefrontal cortex. *Nature*  
714 *Neuroscience* 24, 425-436.

715 McHedlishvili, L., Mazurov, V., Grassme, K.S., Goehler, K., Robl, B., Tazaki, A.,  
716 Roensch, K., Duemmler, A., and Tanaka, E.M. (2012). Reconstitution of the central and  
717 peripheral nervous system during salamander tail regeneration. *Proceedings of the*  
718 *National Academy of Sciences of the United States of America* 109, E2258-2266.

719 Merkle, F.T., Tramontin, A.D., García-Verdugo, J.M., and Alvarez-Buylla, A. (2004).  
720 Radial glia give rise to adult neural stem cells in the subventricular zone. *Proceedings of*  
721 *the National Academy of Sciences of the United States of America* 101, 17528-17532.

722 Niu, W., Zang, T., Smith, Derek K., Vue, Tou Y., Zou, Y., Bachoo, R., Johnson, Jane E.,  
723 and Zhang, C.-L. (2015). SOX2 Reprograms Resident Astrocytes into Neural  
724 Progenitors in the Adult Brain. *Stem cell reports* 4, 780-794.

725 Noctor, S.C., Flint, A.C., Weissman, T.A., Dammerman, R.S., and Kriegstein, A.R.  
726 (2001). Neurons derived from radial glial cells establish radial units in neocortex. *Nature*  
727 409, 714-720.

728 Ortiz, C., Navarro, J.F., Jurek, A., Martin, A., Lundeberg, J., and Meletis, K. (2020a).  
729 Molecular atlas of the adult mouse brain. *Sci Adv* 6, eabb3446.

730 Ortiz, C., Navarro, J.F., Jurek, A., Martín, A., Lundeberg, J., and Meletis, K. (2020b).  
731 Molecular atlas of the adult mouse brain. *Science advances* 6, eabb3446.

732 Porreca, G.J. (2010). Genome sequencing on nanoballs. *Nature biotechnology* 28, 43-  
733 44.

734 Qiu, X., Zhang, Y., Hosseinzadeh, S., Yang, D., Pogson, A.N., Wang, L., Shurtleff, M.,  
735 Yuan, R., Xu, S., Ma, Y., *et al.* (2021). Mapping Transcriptomic Vector Fields of Single  
736 Cells. *bioRxiv*, 696724.

737 Raichle, M.E., and Mintun, M.A. (2006). BRAIN WORK AND BRAIN IMAGING. 29,  
738 449-476.

739 Raivich, G., Bohatschek, M., Da Costa, C., Iwata, O., Galiano, M., Hristova, M., Nateri,  
740 A.S., Makwana, M., Riera-Sans, L., Wolfer, D.P., *et al.* (2004). The AP-1 transcription  
741 factor c-Jun is required for efficient axonal regeneration. *Neuron* 43, 57-67.

742 Rodrigues, S.G., Stickels, R.R., Goeva, A., Martin, C.A., Murray, E., Vanderburg, C.R.,  
743 Welch, J., Chen, L.M., Chen, F., and Macosko, E.Z. (2019). Slide-seq: A scalable  
744 technology for measuring genome-wide expression at high spatial resolution. *Science*  
745 (New York, NY) 363, 1463-1467.

746 Roerdink, J.B.T.M., and Meijster, A. (2000). The Watershed Transform: Definitions,  
747 Algorithms and Parallelization Strategies. *Fundamenta Informaticae* 41, 187-228.

748 Roth, G., and Walkowiak, W. (2015). The Influence of Genome and Cell Size on Brain  
749 Morphology in Amphibians. *Cold Spring Harbor perspectives in biology* 7, a019075.

750 Schloissnig, S., Kawaguchi, A., Nowoshilow, S., Falcon, F., Otsuki, L., Tardivo, P.,  
751 Timoshevskaya, N., Keinath, M.C., Smith, J.J., Voss, S.R., *et al.* (2021). The giant  
752 axolotl genome uncovers the evolution, scaling, and transcriptional control of complex  
753 gene loci. *Proceedings of the National Academy of Sciences of the United States of*  
754 *America* 118.

755 Schreckenberg, G.M., and Jacobson, A.G. (1975). Normal stages of development of the  
756 axolotl, *Ambystoma mexicanum*. *Developmental biology* 42, 391-399.

- 757 Siebert, S., Farrell, J.A., Cazet, J.F., Abeykoon, Y., Primack, A.S., Schnitzler, C.E., and  
758 Juliano, C.E. (2019). Stem cell differentiation trajectories in Hydra resolved at single-cell  
759 resolution. *Science* (New York, NY) 365.  
760 Silver, J., and Miller, J.H. (2004). Regeneration beyond the glial scar. *Nat Rev Neurosci*  
761 5, 146-156.  
762 Smith, K.M., Ohkubo, Y., Maragnoli, M.E., Rasin, M.R., Schwartz, M.L., Sestan, N., and  
763 Vaccarino, F.M. (2006). Midline radial glia translocation and corpus callosum formation  
764 require FGF signaling. *Nat Neurosci* 9, 787-797.  
765 Ståhl, P.L., Salmén, F., Vickovic, S., Lundmark, A., Navarro, J.F., Magnusson, J.,  
766 Giacomello, S., Asp, M., Westholm, J.O., Huss, M., *et al.* (2016). Visualization and  
767 analysis of gene expression in tissue sections by spatial transcriptomics. *Science* (New  
768 York, NY) 353, 78-82.  
769 Tanaka, E.M., and Ferretti, P. (2009). Considering the evolution of regeneration in the  
770 central nervous system. *Nature Reviews Neuroscience* 10, 713-723.  
771 Tasoulis, D.K., Plagianakos, V.P., and Vrahatis, M.N. (2006). Unsupervised clustering in  
772 mRNA expression profiles. *Computers in biology and medicine* 36, 1126-1142.  
773 Temple, S. (2001). The development of neural stem cells. *Nature* 414, 112-117.  
774 Todd E. Anthony, C.K., Gord Fishell, and Nathaniel Heintz (2004). Radial Glia Serve as  
775 Neuronal Progenitors in All Regions of the Central Nervous System. *Neuron* 41, 881-  
776 890.  
777 van der Walt, S., Schönberger, J.L., Nunez-Iglesias, J., Boulogne, F., Warner, J.D.,  
778 Yager, N., Gouillart, E., and Yu, T. (2014). scikit-image: image processing in Python.  
779 *PeerJ* 2, e453.  
780 Westhoff, G., and Roth, G. (2002). Morphology and projection pattern of medial and  
781 dorsal pallial neurons in the frog *Discoglossus pictus* and the salamander *Plethodon*  
782 *jordani*. *The Journal of comparative neurology* 445, 97-121.  
783 Xia, C., Fan, J., Emanuel, G., Hao, J., and Zhuang, X. (2019). Spatial transcriptome  
784 profiling by MERFISH reveals subcellular RNA compartmentalization and cell cycle-  
785 dependent gene expression. *Proceedings of the National Academy of Sciences of the*  
786 *United States of America* 116, 19490-19499.  
787 Yang, Z., Covey, M.V., Bitel, C.L., Ni, L., Jonakait, G.M., and Levison, S.W. (2007).  
788 Sustained neocortical neurogenesis after neonatal hypoxic/ischemic injury. *Ann Neurol*  
789 61, 199-208.  
790 Zeisel, A., Köstler, W.J., Molotski, N., Tsai, J.M., Krauthgamer, R., Jacob-Hirsch, J.,  
791 Rechavi, G., Soen, Y., Jung, S., Yarden, Y., *et al.* (2011). Coupled pre-mRNA and  
792 mRNA dynamics unveil operational strategies underlying transcriptional responses to  
793 stimuli. *Molecular systems biology* 7, 529.

794

795

## 796 **ACKNOWLEDGMENTS**

797 This work was supported by the Guangdong Provincial Key Laboratory of Genome  
798 Read and Write (2017B030301011), the National Natural Science Foundation of China  
799 (32171289, 31970619) and the Innovative Research Group Program of Hubei Province  
800 (2020CFA017). Ji-Feng Fei was supported by the National Key R&D Program of China

801 (2019YFE0106700), the Natural Science Foundation of China (31970782), Project of  
802 Department of Education of Guangdong Province (2018KZDXM027), Key-Area  
803 Research and Development Program of Guangdong Province (2018B030332001,  
804 2019B030335001) and Guangdong-Hong Kong-Macao-Joint Laboratory Program  
805 (2019B121205005).

806

## 807 **AUTHOR CONTRIBUTIONS**

808 X.W., G.Y., J.F.F., X.X., C.L. and H.L. conceived the idea; G.Y., J.F.F., X.X., C.L. and  
809 H.L. supervised the work; X.W., S.F., H.L. and J.F.F. designed the experiment; S.F., X.L.  
810 and N.Z. performed the majority of the experiments with the help from M.C., J.J., J.X.,  
811 Y.Z., P.L., X.S. and C.P.; X.W., Y.L., S.W., W.F. and Y.Y. performed data analysis; M.K.  
812 and T.Y. performed database construction; Y.L., X.Q., L.W., L.H., L.C., Y.Y., X.P., S.G.,  
813 A.C., M.A.E., H.Y., J.W., G.F. and L.L. gave the relevant advice; H.L., Y.G., L.C., J.F.F.  
814 and X.W. wrote the manuscript with input from all authors. All other authors contributed  
815 to the work. All authors read and approved the manuscript for submission.

816

## 817 **DECLARATION OF INTERESTS**

818 Employees of BGI have stock holdings in BGI. All other authors declare no competing  
819 interests.

## 820 **RESOURCE AVAILABILITY**

821

### 822 **Lead contact**

823 Further information and requests for the resources and reagents may be directed to the  
824 corresponding author Ying Gu ([guying@genomics.cn](mailto:guying@genomics.cn))

825

### 826 **Material availability**

827 All materials used for Stereo-seq are commercially available.

828

### 829 **Data and code availability**

830 All raw data generated by Stereo-seq have been deposited to CNGB Nucleotide  
831 Sequence Archive (accession code: CNP0002068  
832 (<https://db.cngb.org/search/project/CNP0002068>). Any additional information is available  
833 from the corresponding authors upon reasonable request.

## 834 **METHODS**

835

### 836 **Animal care**

837 The d/d Strain of *Ambystoma mexicanum* used in this study was originally obtained from  
838 Elly M. Tanaka laboratory (Research Institute of Molecular Pathology, Vienna Biocenter,  
839 Vienna, Austria). Animals were housed and bred at 18-20°C in fresh water under standard  
840 conditions. All relevant procedures of animal experiments were carried out in accordance  
841 with the animal welfare legislation in China, with local approval from the Biomedical  
842 Research Ethics Committee of Guangdong Provincial People's Hospital.

843

### 844 **Brain injury**

845 10-13cm juvenile axolotls were used for brain injury experiments. Axolotl brain injury was  
846 performed as described previously (Amamoto et al., 2016). Briefly, animals were firstly  
847 anesthetized in 0.03% ethyl-p-aminobenzoate solution (E1501, Sigma-Aldrich, St.Louis,  
848 MO), followed by surgeries to create rectangular cranial skin/skull flaps and expose the  
849 left telencephalon of each experimental animal using scalpels and spring scissors. Finally,  
850 a square-shaped (size 0.5mm x 0.5mm) piece of dorsal telencephalon tissue was  
851 removed for each animal to generate brain damage. To accurately determine the injury  
852 site, the incisions were placed right in between the olfactory bulb and choroid plexus on  
853 the left telencephalon of animals. After the injury, the cranial skin/skull flaps were restored  
854 without suture.

855

### 856 **Tissue collection**

857 For stereo-seq cryosection, brain samples from three developmental stages (Stage 44,  
858 stage 54, stage 57), juvenile, adult and metamorphosed animals, and seven regenerative  
859 stages (2 days post injury (2 DPI), 5 DPI, 10 DPI, 15 DPI, 20 DPI, 30 DPI, 60 DPI) were



860 collected from ethyl-p-aminobenzoate anaesthetized d/d axolotls. Brain samples were  
861 immediately snap-frozen in Tissue-Tek OCT (4583, Sakura, Torrance, CA) with liquid  
862 nitrogen prechilled isopentane and then transferred to -80°C refrigerator for storage  
863 before further operation. To minimize RNA degradation, the entire dissection procedure  
864 was performed on ice, and the tissue collection was completed within 30 minutes.  
865 For *in situ* hybridization and EdU detection, we collected additional brains from juvenile  
866 and adult d/d axolotls for cryosection. Brain samples were first fixed with MEMFA for 3  
867 days, then transferred into 30% sucrose prepared in 1× PBS for 24 hours and finally  
868 embedded in Tissue-Tek OCT with dry-ice. The OCT blocks were stored in -80°C freezer  
869 before cryosection.

870

### 871 **Tissue cryosection**

872 For cryosection collection, the working area of the freezing microtome (CM1950, Leica,  
873 Wetzlar, Germany) were sequentially cleaned with RNase Zap (AM9780, Invitrogen,  
874 Waltham, MA) and DPEC (40718, Sigma-Aldrich, St. Louis, MO)-treated water. After the  
875 machine is completely dried, we set the machine temperature to -25°C for cryosection.  
876 We collected 20-µm coronal cryosections for Stereo-seq, and 10-µm coronal cryosections  
877 for *in situ* hybridization and EdU detection, according to manufactory's instructions.

878

### 879 **Stereo-seq tissue fixation and ssDNA staining**

880 For Stereo-seq cryosection collection, tissue sections were directly adhered to the Stereo-  
881 seq chip surface. The sections on chips were incubated at 37°C for 3 minutes, followed  
882 by methanol fixation for 30 minutes at -20°C. Then the sections on chips were stained  
883 with nucleic acid dye (Thermo fisher, Q10212) for ssDNA visualization. Images of ssDNA  
884 were acquired with a Ti-7 Nikon Eclipse microscope.

885

### 886 **Stereo-seq libraries construction**

887 Tissue sections placed on the chip were permeabilized using 0.1% pepsin (Sigma, P7000)  
888 in 0.01 M HCl buffer and incubated at 37°C for 12 minutes. RNA released from the  
889 permeabilized tissue and captured by the DNA nanoball (DNB) was reverse transcribed  
890 at 42°C overnight. Tissue sections were digested with tissue removal buffer (10 mM Tris-

891 HCl, 25 mM EDTA, 100 mM NaCl, 0.5% SDS) at 37°C for 30 minutes after reverse  
892 transcription. cDNA-containing chips were then subjected to Exonuclease I (NEB,  
893 M0293L) treatment for 1 hour at 37°C and cDNAs were amplified with KAPA HiFi Hotstart  
894 Ready Mix (Roche, KK2602). PCR reactions were conducted as follow: 95°C for 5  
895 minutes, 15 cycles at 98°C for 20 seconds, 58°C for 20 seconds, 72°C for 3 minutes and  
896 a final incubation at 72°C for 5 minutes. The concentrations of the resulting PCR products  
897 were quantified by Qubit™ dsDNA Assay Kit (Thermo, Q32854). A total of 20 ng of DNA  
898 were then fragmented with in-house Tn5 transposase at 55°C for 10 minutes, after which  
899 the reactions were stopped by the addition of 0.02% SDS. Fragmentation products were  
900 amplified with KAPA HiFi Hotstart Ready Mix. The reaction flow was: 1 cycle of 95°C 5  
901 minutes, 13 cycles of (98°C 20 seconds, 58°C 20 seconds and 72°C 30 seconds) and 1  
902 cycle of 72°C 5 minutes. PCR products were purified and used to generate DNB, then  
903 sequenced (35 bp for read 1, 100 bp for read 2) on a MGI DNBSEQ-T1 sequencer.

904

#### 905 ***In situ* hybridization**

906 Total cDNA was prepared using the RNA mixture from axolotl brain tissues at different  
907 stages. Target genes were amplified with total cDNA as template, and synthesized  
908 oligonucleotides harboring T7 promoter as primers. The PCR products were used as  
909 template to synthesize Dig-labelled antisense RNA probes by *in vitro* transcription. The  
910 *in situ* hybridization was performed on 10-µm axolotl brain coronal cryosection as  
911 previously described (*Knapp et al., 2013*). Briefly, air-dried slides were washed by 0.1%  
912 Tween in 1 × PBS for 5 minutes for three times, then by 0.3% Triton in 1 × PBS for 20  
913 minutes at room temperature. For pre-hybridization, slides were immersed in  
914 hybridization buffer (10% dextran, 5 × SSC, 50% formamide, 0.1% Tween, 1 mg/ml yeast  
915 RNA, 100 µg/ml heparin, 1 x Denhardt's solution, 0.1% CHAPS and 5 mM EDTA) at 60°C  
916 for at least 30 minutes. Then, slides were incubated in hybridization buffer containing 500  
917 ng/ml antisense RNA probes at 60°C overnight. After hybridization, excessive RNA  
918 probes were removed by washing twice with post-hybridization buffer (5 × SSC, 50%  
919 formamide and 0.1% Tween) for 30 minutes at 60°C twice, followed by wash buffer (2 ×  
920 SSC, 50% formamide and 0.1% Tween) for 30 minutes at 60°C. The slides were then  
921 washed with 0.2 × SSC buffer (0.2 × SSC and 0.1% Tween) for 30 minutes at 60°C once

922 and room temperature once, followed by TNE buffer (10mM Tris pH7.5, 500 mM NaCl, 1  
923 mM EDTA) for 10 minutes twice. Next, RNase A treatment was performed (Sigma, R4642)  
924 in TNE buffer for 1 hour at 37°C. RNase A was removed by washing with TNE buffer for  
925 10 minutes twice. For sample blocking, slides were incubated with MAB buffer (100 mM  
926 maleic acid, 150 mM NaCl, 0.1% Tween and pH was adjusted to pH 7.5 with NaOH) for  
927 5 minutes twice and 20 minutes once, followed by incubation with blocking buffer (Roche,  
928 11096176001) at room temperature for 1 hour. Then sections were incubated with Anti-  
929 DIG-AP fab antibody (Roche, 11093274910) prepared in blocking buffer overnight at 4°C.  
930 Afterwards, slides were washed five times with MAB buffer for 10 minutes at room  
931 temperature and once in freshly-prepared AP buffer (100 mM Tris pH 9.5, 50 mM MgCl<sub>2</sub>,  
932 100 mM NaCl and 0.1% Tween). Finally, we used BM purple (Roche, 11442074001)  
933 substrate for signal visualization and the reaction was stopped with 1 mM EDTA in 1 ×  
934 PBS. Primers used for antisense RNA probe synthesis are listed in Table S7.

935

### 936 **EdU labeling**

937 For *in vivo* cell proliferation detection during brain regeneration, a single pulse of EDU  
938 (A10044, Thermo Fisher Scientific, Waltham, MA, 10 µg EdU per gram of body weight)  
939 was intraperitoneally injected into animals 6 hours prior to sample collection. EdU  
940 detection was performed according to the manufacturer's protocol of the Click iT Plus  
941 EdU Alexa fluor 594 imaging kit (C10339, Thermo Fisher Scientific, Waltham, MA).

942

### 943 **Stereo-seq raw data processing**

944

945 Stereo-seq fastq files were generated from a MGI DNBSEQ-T1 sequencer. Read 1  
946 contained CID and MID sequences (CID: 1-25bp, MID: 26-35bp), while read 2 contained  
947 the cDNA sequence. Retained reads were then aligned to the reference genome  
948 AmexG\_v6.0 (Schloissnig et al., 2021) via STAR (Dobin et al., 2013). Mapped reads with  
949 MAPQ  $\geq$  10 were annotated, then calculated by handleBam (available at  
950 <https://github.com/BGIResearch/handleBam>). Reads overlapped more than 50% with the  
951 exon region were counted as exon transcripts. Reads overlapped less than 50% with the  
952 exon region yet possess overlapped sequences with the adjacent intron sequence were

953 annotated as intron transcripts, otherwise as intergenic transcripts. UMIs with both the  
954 same CID and gene locus was collapsed, and 1 base pair of mismatches to correct  
955 sequencing was allowed for PCR errors. Finally, the exonic reads were used to generate  
956 a CID-containing expression profile matrix.

957

### 958 **Circling method for single cell identification of Stereo-seq data**

959 The ssDNA images were used to identify the nuclei region via scikit-image python  
960 package (version 0.18.1) (van der Walt et al., 2014). Global threshold was applied to filter  
961 background noise and Gaussian-weighted local threshold was calculated to process gray  
962 images into binary images, with block size of 41 and offset of 0.03. To segment cell nuclei  
963 with overlapped regions, the exact Euclidean distance transformation was performed.  
964 Labels representing different cell nuclei were transferred to pinpoint DNBs corresponding  
965 to spatial positions by watershed algorithm (Roerdink and Meijster, 2000).

966

### 967 **Unsupervised spatially-constrained clustering of Stereo-seq data**

968 The raw count matrices of axolotl adult telencephalon samples were normalized by  
969 SCTransform function in Seurat (v4.0.2) (Hao et al., 2021), and spatial information was  
970 taken into consideration for unsupervised clustering by custom script. In brief, the mean  
971 values of x-axis and y-axis on bins of each single-nuclei cell were calculated as single-  
972 nuclei cell space coordinates. Spatial k-nearest neighbor graph  $G_{spatial}^{k_1}$  ( $k_1 = 6$ ) was  
973 built via Squidpy and then took the union with the k-nearest neighbor graph  $G_{expression}^{k_2}$   
974 based on transcriptomic data ( $k_2$  is by default set to be 30). The combined graph  
975 ( $G^{combined} = G_{spatial}^{k_1} \cup G_{expression}^{k_2}$ ) was then used as input for leiden clustering at  
976 resolution of 0.5. The adult telencephalon brain regions were identified based on  
977 anatomical structure (González et al., 2017; Lazcano et al., 2021).

978

### 979 **Single cell level clustering and annotation of Stereo-seq**

980 Reads captured by DNBs were summarized based on the results of cell segmentation to  
981 obtain the single cell level gene expression matrices for downstream analysis. Nuclei with  
982 UMIs number less than 200 were discarded. The raw count matrices were then  
983 normalized by SCTransform function in Seurat (v4.0.2) to eliminate sequencing depth

984 effects. Reference-based integration was applied along with reciprocal PCA (RPCA) to  
985 integrate all slides to avoid potential batch effects. Cluster analysis was performed by  
986 FindClusters function in Seurat (v4.0.2) with resolution of 2. Clustering results were  
987 displayed by uniform manifold approximation and projection (UMAP) dimension reduction  
988 analysis. Major cell types were annotated based on marker gene sets. Visualization of  
989 spatial plots in single-DNB resolution with cell boundary were performed by custom script.  
990

### 991 **Gene Module analysis**

992 Gene module expression score was calculated to evaluate the expression level of  
993 individual cells regarding predefined gene sets. Stemness, cell cycle *and* translation  
994 scores of each cell were calculated by AddModuleScore function with default parameters  
995 (ctrl = 100, nbin = 24) implemented in the Seurat (v4.0.2) R package (Hao et al., 2021),  
996 with respective gene sets manually selected from GO, BIOCARTA, PID, REACTOME and  
997 KEGG databases. The detailed gene lists can be found in Table S3.  
998

### 999 **Construction of one-to-one orthologous between axolotl and mouse**

1000 To optimize the gene annotation of axolotl, a gene ortholog table was created with the  
1001 mouse genome as the reference gene list. 46,581 axolotl protein coding genes were  
1002 identified from the AmexG\_v6.0 genome (Schloissnig et al., 2021). Mouse reference  
1003 genome and GFF file (GRCm39) were downloaded from NCBI, the longest transcript of  
1004 each mouse gene was picked by an in-house Perl script. From which, 22,173 mouse  
1005 protein coding genes were identified. The orthologous genes were inferred using blastp  
1006 (Altschul et al., 1997) of the axolotl proteins vs. the mouse proteins. As a result, 20,650  
1007 one-to-one orthologous genes were identified between axolotl and mouse, which were  
1008 used for functional annotation of axolotl in the follow-up analysis.  
1009

### 1010 **Mouse data processing**

1011 To compare the expression of stemness related genes in developmental stages between  
1012 axolotl and mouse, we used the published matrix data and metadata of mammalian  
1013 cerebral cortex atlas from the Single Cell Portal  
1014 ([https://singlecell.broadinstitute.org/single\\_cell/study/SCP1290/molecular-logic-of-](https://singlecell.broadinstitute.org/single_cell/study/SCP1290/molecular-logic-of-)

1015 cellular-diversification-in-the-mammalian-cerebral-cortex) (Di Bella et al., 2021). The  
1016 count matrices were then normalized by SCTransform function in Seurat (v4.0.2) to  
1017 eliminate sequencing depth effects. Highly variable genes within the homeotic genes in  
1018 both axolotl and mouse were identified by SelectIntegrationFeatures function of Seurat  
1019 (v4.0.2). Based on that, axolotl development data and the mouse cerebral cortex atlas  
1020 were integrated by FindAnchors and IntegrateData functions of Seurat (v4.0.2) with  
1021 default dimensionality of 30.

1022

### 1023 **Mfuzz analysis**

1024 Stereo-seq SCT normalized gene expression for cells from the same stage was  
1025 aggregated to form a pseudo-bulk gene expression matrix. Prior to clustering, genes with  
1026 expression < 0.5 at all stages were removed. The normalized data of the remaining genes  
1027 was then Z-score transformed before executing the c-means fuzzy clustering the time-  
1028 course regeneration data, with two centers and a cluster membership threshold of 0.8  
1029 (Kumar and M, 2007).

1030

### 1031 **RNA velocity analysis**

1032 RNA velocity was performed by Dynamo following the instructions at [https://dynamo-](https://dynamo-release.readthedocs.io/)  
1033 [release.readthedocs.io/](https://dynamo-release.readthedocs.io/) (Qiu et al., 2021). The relative abundance of nascent (unspliced)  
1034 and mature (spliced) mRNA can be exploited to estimate the rates of gene splicing and  
1035 degradation. The unspliced and spliced raw count matrices were calculated by Velocity  
1036 according to annotation file and bam file processed and annotated by handleBam (bin-  
1037 point label was substituted by cell ID) (La Manno et al., 2018). Unspliced and spliced raw  
1038 count matrix of regeneration-related cell types were extracted to process by  
1039 *recipe\_monocle* function in Dynamo (Qiu et al., 2021). Highly expressed genes with  
1040 significant MoranI index were selected as feature genes to perform dimension reduction  
1041 via UMAP with default parameters. Then, kinetic parameters and gene-wise RNA velocity  
1042 vectors were estimated on the normalized matrix, which were projected into the visualized  
1043 spatial plot to retain spatial information. Streamlines were used to visualize the velocity  
1044 vector flows on specific regeneration-related cell types in injured dorsal region of  
1045 telencephalic sections.

1046 To facilitate the understanding of related genes determining the fate of target cells,  
1047 the continuous vector field in the UMAP space and spatial space were established by the  
1048 `vf` VectorField function depending on `sparseVFC` to learn the high dimensional vector field  
1049 in the expression space from sparse single nuclei cell velocity vector robustly. Next,  
1050 based on the learned `vf` VectorField function, `ddhodge` function was applied on our data  
1051 to obtain UMAP pseudotime and spatial pseudotime. Finally, the gene expression  
1052 dynamics vector field was visualized along the pseudotime, and genes with significant  
1053 spatio-temporal expressional preference were selected.

1054

## 1055 **FIGURE LEGENDS**

1056

### 1057 **Figure 1. Stereo-seq visualizes spatial transcriptome profile of axolotl** 1058 **telencephalon at single-cell resolution**

1059 (A) Schematic diagram of Stereo-seq for axolotl telencephalon. *Step 1*, sample collection  
1060 and frozen section preparation of the adult axolotl telencephalon. *Step 2*, *in situ* RNA  
1061 capture from tissue placed on the chip. *Step 3*, cDNA amplification, library construction  
1062 and sequencing.

1063 (B) Overlaying spatially assigned spliced- (red) and unspliced-transcripts (green) with  
1064 corresponding ssDNA staining picture (left). Single-nucleus were defined based on  
1065 ssDNA staining and represented by different colors (right).

1066 (C) Unsupervised spatially constraint clustering analysis considering location information  
1067 of individually deduced nucleus at single-cell resolution. Cells were colored by region  
1068 annotation. DP, dorsal pallium. MP, medial pallium. LP, lateral pallium. VZ, ventricular  
1069 zone.

1070 (D) UMAP visualization of all cells profiled in adult axolotl telencephalon section. The  
1071 colors correspond to the 15 identified cell types.

1072 (E) Spatial distribution of cell types identified in adult axolotl telencephalon section at  
1073 single-cell resolution. Cell types are annotated by colored cubes.

1074 (F) Spatial visualization of selected gene expression on Stereo-seq map (top) and their  
1075 correspondent *in situ* hybridization image (bottom). *Neurod6*, excitatory neuron marker;  
1076 *Gad1*, inhibitory neuron marker; and *Gfap*, radial glial cell marker.

1077 (G) Distribution of SSTIN cells in the medial pallium region of adult axolotl telencephalon.  
1078 Putative SSTIN cells are colored by green and signified by white arrow (left). Single cells  
1079 highly express *Sst* gene are signified by white arrow (right).

1080 See also Figure S1-S4

1081

1082 **Figure 2. Spatio-temporal transcriptomic atlas of developmental, juvenile, adult and**  
1083 **metamorphosis axolotl telencephalons at single-cell resolution**

1084 (A) Schematic diagram of sample collection (left). Unsupervised clustering of the axolotl  
1085 telencephalon sections at stage 44 (St.44), stage 54 (St.54), stage 57 (St.57), juvenile  
1086 (Juv.), Adult and metamorphosis (Meta.). Cell types are distinguished by colors. Scale  
1087 bars, 500  $\mu\text{m}$  (right).

1088 (B) Dotplot showing the ratio dynamic of cell types in the axolotl telencephalon from St.44,  
1089 St.54, St.57, Juv., Adult and Meta.

1090 (C) Violin plot (left) and spatial visualization (right) of gene module expression defining  
1091 NSC (neural stem cell), Cell cycle and Translation captured by Stereo-seq at different  
1092 stages of axolotl telencephalon development.

1093 (D) Bar plot represents the cell ratio dynamic of NSC in the development process of  
1094 axolotl and mouse.

1095 (E) Violin plot of gene module expression defining NSC at different stages in axolotl  
1096 telencephalon development and in mouse embryonic development.

1097 See also Figure S5-S12

1098

1099 **Figure3. Spatiotemporal transcriptomic atlas of axolotl brain regeneration at**  
1100 **single-cell resolution**

1101 (A) Schematic diagram of samples collection (upper left). Spatial visualization of cell types  
1102 identified on the axolotl telencephalon sections at homeostatic and regenerative stages  
1103 at single-cell resolution. Cell types are annotated by colored cubes on top. The squares  
1104 indicate the regions analyzed in B and D. Scale bars, 200  $\mu\text{m}$ . DPI, day post injury.

1105 (B) Spatial visualization of cell distribution in VZ zone (upper) and key marker expression  
1106 (bottom) in the injured part of adult axolotl telencephalon section across 2DPI, 5DPI,  
1107 10DPI, 15DPI, 20DPI. Cell types are annotated by colored cubes on top.



1108 (C) Expression level of two gene modules in REARGC and other RGC cells from 2 DPI  
1109 to 20 DPI (left). Heatmap reflecting the expression of genes from different modules (right).  
1110 List of representative key markers in two modules, respectively (middle).

1111 (D) Left panel: Spatial visualization of REARGCs of two different states in the injured  
1112 regions of adult axolotl telencephalon from 2 DPI to 20 DPI. Cell state is distinguished by  
1113 the gene modules in C. Right panel: Spatial visualization of Cell cycle module expression  
1114 from 2 DPI to 20 DPI.

1115 (E) EdU staining indicating the proliferating cells in 10 DPI and 15 DPI.

1116 See also Figure S13-S22

1117

1118 **Figure4. Dynamics of regeneration related cells in differentially recovered sections**  
1119 **at 15 DPI reveal potential lineage transition process during regeneration**

1120 (A) Positions of 4 continuous sections at 15 DPI (top left) and respective 3D display (top  
1121 middle). Spatial visualization of cell types identified in 4 continuous axolotl telencephalon  
1122 sections at 15 DPI at single-cell resolution (bottom). Cell types are annotated by colored  
1123 cubes on top. Scale bars, 500  $\mu\text{m}$ .

1124 (B) Bubble plot reflecting the expression dynamics of marker gene defining REARGCs,  
1125 RIPC1s and immature NPTXEXs, which are major cell types involved in axolotl  
1126 telencephalon regeneration.

1127 (C) Spatial visualized heatmap showing the expression pattern of key markers for  
1128 regenerative related cells in the injury area of section 15 DPI-2, 15 DPI-3 and 15 DPI-4.

1129 (D) Spatial visualization exhibiting the cell type distribution around the regenerating site  
1130 in 15 DPI-4.

1131 (E-F) RNA velocity streamline plots showing the predicted trajectory of cell lineage  
1132 transition in the regenerating region of axolotl telencephalon. Areas are colored by either  
1133 annotated cell clusters (E) or pseudotime (F).

1134 (G) Expression heatmap of genes with high transitional activities in a pseudo-temporal  
1135 order accord with the regeneration process.

1136 (H) Scatter plot showing the pseudotime kinetics of *Nes*, *S100a10*, *Ankrd1*, *Nptx1*, *Satb1*  
1137 and *Cdkn1c* in regenerating cell types.

1138 See also Figure S23-S27

1139

1140 **Figure5. Comparison of neurogenesis in development and regeneration process**

1141 (A-B) Spatial distribution of RGCs, IPCs, immature NPTXEXs and NPTXEXs in the dorsal  
1142 pallium of left hemisphere at 15 DPI-4 (A), and at St.44, St.54, St.57 and Juv. (B).

1143 (C) Heatmap represents the correlation between different RGC types across four  
1144 developmental or regenerative stages.

1145 (D) Spatial distribution of dorsal pallium cell types in the left hemisphere of axolotl  
1146 telencephalon, cells potentially involved in the development of NPTXEX are framed by  
1147 white dash line. Cell types are annotated by colored cubes on top.

1148 (E) Spatial visualized expression of key markers for cells involved in NPTXEX  
1149 development.

1150 (F) RNA velocity streamline plot showing the predicted dorsal pallium development  
1151 trajectory in the left hemisphere of axolotl telencephalon at St.57 .

1152 (G-H) RNA velocity streamline plot showing the predicted lineage transition trajectory of  
1153 RGCs, IPCs, immature NPTXEXs and NPTXEXs at St.57 (G) and 15 DPI-4 (H).

1154 (I) Left panel: Heatmap of gene expression during NPTXEX development and  
1155 regeneration. Eight distinct groups of genes were sorted by their expression dynamic  
1156 pattern. Right panel: Line plot depicting standardized Stereo-seq signal by fuzzy cluster  
1157 analysis for eight groups, with green lines representing the expression dynamics of each  
1158 individual gene and the orange line representing the integrated pattern of each group at  
1159 Stage 57 and 15 DPI (right). Names of eight groups are listed on top right. Dev UP&Reg  
1160 UP, co-upregulation in development and regeneration. Dev UP&Reg Down, upregulation  
1161 in development while downregulation in regeneration. Dev UP&Reg None, upregulation  
1162 in development while no significant change in regeneration. Dev Down&Reg Down, co-  
1163 downregulation in development and regeneration. Dev Down&Reg UP, downregulation  
1164 in development while upregulation in regeneration. Dev Down&Reg None,  
1165 downregulation in development while no significant change in regeneration. Dev  
1166 None&Reg UP, no significant change in development while upregulation in regeneration.  
1167 Dev None&Reg Down, no significant change in development while downregulation in  
1168 regeneration.

1169 (J) Barplot exhibiting the representative GO enrichment pathways of Dev UP&Reg UP,  
1170 Dev Down&Reg Down, Dev None&Reg UP and Dev None&Reg Down in I.

1171 See also Figure S28-S30

1172 **Figure S1. Stereo-seq at single-cell resolution, related to Figure 1**

1173 (A) The arrangement of DNB array used to capture mRNA in single nucleus.

1174 (B) Images of ssDNA staining, spatial visualization of cell types, spatial visualization of  
1175 gene expression and corresponding *in situ* hybridization of *Nptx1*, *Slc1a3* and *Cck*.

1176

1177 **Figure S2. Spatial visualization of marker genes in the adult axolotl telencephalon,**  
1178 **related to Figure 1**

1179 (A) Heatmap showing the mean expression of DEGs between the 15 cell types in Figure  
1180 1D and E.

1181 (B) Spatial visualization of representative cell type markers in adult axolotl telencephalon  
1182 section at single-cell resolution (left). *In situ* hybridization of representative cell type  
1183 markers in axolotl telencephalon section (right).

1184

1185 **Figure S3. Cell type distribution of adult axolotl telencephalon, related to Figure 1**

1186 (A-B) Boxplot showing the count number of UMIs (transcripts) (A) and genes (B) captured  
1187 by Stereo-seq in 15 cell types of adult axolotl telencephalon, related to Figure 1D and E.

1188 (C) Barplot exhibiting the number of single-nucleus for each cell type analyzed in Figure  
1189 1.

1190 (D) Pie chart reflecting the ratio of each cell type detected in adult axolotl telencephalon.

1191 (E) Spatial distribution of each cell type on adult axolotl telencephalon section, cell types  
1192 are colored as annotated in Figure 1.

1193

1194 **Figure S4. Stereo-seq identifies ventricular zone (VZ) cells in the adult axolotl**  
1195 **telencephalon, related to Figure 1**

1196 Spatial visualization of radial glial marker expression in VZ on adult axolotl telencephalon  
1197 section. Expression of markers are exhibited at single-cell resolution (left). Integrated  
1198 expression of 6 markers is displayed as unified gene module (right).

1199

1200 **Figure S5. Unsupervised clustering of cells in axolotl telencephalon development,**  
1201 **related to Figure 2**

1202 (A) UMAP showing the clusters in each stage in Figure 2. 33 cell types are identified and  
1203 annotated as in Figure 2A.

1204 (B) UMAP showing the integration of 33 cell types across different stages.

1205 (C) UMAP showing the distribution of cells from each sampling stage in Figure 2. Red  
1206 dots represent the cells from the corresponding time point, gray dots represent all the  
1207 other cells.

1208

1209 **Figure S6. Markers of cell cluster in axolotl telencephalon, related to Figure 2**

1210 Heatmap showing the normalized expression of marker genes for the indicated  
1211 anatomical structures of the axolotl telencephalon sections profiled by Stereo-seq in  
1212 Figure 2A.

1213

1214 **Figure S7, S8, S9, S10, S11. Global spatial profiling of cell types, related to Figure**  
1215 **2**

1216 Spatial visualization of cell type distribution in different axolotl telencephalon sections  
1217 profiled by Stereo-seq in Figure 2A. Cells were colored by their annotation.

1218

1219 **Figure S12. Comparative analysis of NSC between axolotl and mouse, related to**  
1220 **Figure 2**

1221 (A) UMAP of integrated axolotl Stereo-seq data and mouse single-cell RNA-seq data.

1222 (B-C) UMAP visualization of cell types identified in axolotl data (B) and mouse data(C).

1223 (D) UMAP visualization of mouse embryonic neural stem cells at each stage profiled by  
1224 single-cell RNA-seq. Red dots represent neural stem cells at each stage, gray dots  
1225 represent other cells at respective stage.

1226

1227 **Figure S13. Cell dynamics of axolotl telencephalon regeneration, related to Figure**  
1228 **3**

1229 (A) UMAP visualizing the clusters at each stage. 23 cell types are identified and annotated  
1230 as in Figure 3A.

- 1231 (B) UMAP showing the integration of 23 cell types across different stages.  
1232 (C) UMAP showing the distribution of cells from each sampling stage in Figure 3A. Red  
1233 dots represent the cells from the corresponding time point, gray dots represent all the  
1234 other cells.  
1235 (D) Dotplot showing the cell ratio dynamics from control to 60 DPI during axolotl  
1236 telencephalon regeneration. Red dots represent cellular ratio in injured hemisphere, blue  
1237 dots represent cellular ratio in uninjured hemisphere, dot size reflect the ratio.

1238

1239 **Figure S14. Markers of cell clusters across axolotl telencephalon sections at**  
1240 **regenerative stages, related to Figure 3**

1241 Heatmap showing the normalized expression of marker genes of 23 cell types from axolotl  
1242 telencephalon sections at regenerative stages profiled by Stereo-seq in Figure 3A.

1243

1244 **Figure S15, S16, S17, S18, S19, S20, S21, S22 Global spatial profiling of cell types**  
1245 **at regenerative stages, related to Figure 3**

1246 Spatial visualization of cell type distribution at different axolotl telencephalon regenerative  
1247 stages profiled by Stereo-seq in Figure 3A. Cells were colored by their annotation.

1248

1249 **Figure S23. Unsupervised clustering of cells across continuous sections at 15 DPI,**  
1250 **related to Figure 4**

1251 (A) UMAP visualization of clusters in each section at 15 DPI. 25 cell types are identified  
1252 and annotated as in Figure 4.

1253 (B) UMAP showing the integration of 25 cell types across different sections.

1254 (C) UMAP showing the distribution of cells from each sampling section in Figure 4A. Red  
1255 dots represent the cells from the corresponding time point, gray dots represent all the  
1256 other cells.

1257 (D) Dotplot showing the cell ratio dynamics in different regeneration sections at 15 DPI.  
1258 Red dots represent cellular ratio in injured hemisphere, blue dots represent cellular ratio  
1259 in uninjured hemisphere, dot size reflect the ratio.

1260

1261 **Figure S24. Markers of cell clusters across continuous sections at 15 DPI, related**  
1262 **to Figure 4**

1263 Heatmap showing the normalized expression of marker genes for 25 cell types in 4  
1264 neighbor axolotl telencephalon sections at 15 DPI profiled by Stereo-seq in Figure 4A.

1265

1266 **Figure S25, S26, S27. Global spatial profiling of cell types across continuous**  
1267 **sections at 15 DPI , related to Figure 4**

1268 Spatial visualization of cell type distribution in neighbor regenerating sections of the  
1269 axolotl telencephalon at 15 DPI profiled by Stereo-seq in Figure 4A. Cells were colored  
1270 by their annotation.

1271

1272 **Figure S28. RNA velocity analysis of 15 DPI-2 and 15 DPI-3, related to Figure 4**

1273 (A) Spatial visualization of cell types involved in regeneration around the injured site of  
1274 15DPI-2(A).

1275 (B-C) RNA velocity streamline plots simulating the regeneration trajectory of 15DPI-2.  
1276 Cells are colored by their annotation(B) or pseudotime (C).

1277 (D) Expression heatmap of genes with high transitional activity in a pseudo-temporal  
1278 order in section 15 DPI-2.

1279 (E) Scatter plots showing the pseudotime kinetics of *Nes*, *Tnc*, *Tubb6*, *Cdkn1a*, *Ankrd1*  
1280 and *Nptx1* in different cell types of 15 DPI-2.

1281 (F) Spatial visualization of cell types involved in regeneration around the injured site of 15  
1282 DPI-3(F).

1283 (G-H) RNA velocity streamline plots simulating the regeneration trajectory of 15 DPI-3.  
1284 Cells are colored by their annotation (G) or pseudotime (H).

1285 (I) Expression heatmap of genes with high transitional activity in a pseudo-temporal order  
1286 in section 15 DPI-3.

1287 (J) Scatter plots showing the pseudotime kinetics of *S100a10*, *Nes*, *Cdkn1c*, *Cdkn1a*,  
1288 *Nptx1* and *Ankrd1* in different cell types of 15 DPI-3.

1289

1290 **FigureS29. Neurogenesis trajectory analysis of axolotl telencephalon at different**  
1291 **developmental stages**

1292 (A-C) Spatial visualization of cells involved in telencephalon development at stage 44 (A),  
1293 stage 54 (B) and juvenile (C) (left). Expression of key marker genes at stage 44 (A), stage  
1294 54 (B) and juvenile (C) (middle). RNA velocity streamline plots showing the predicted  
1295 lineage transition trajectory at stage 44 (A), stage 54 (B) and juvenile (C) (right).

1296

1297 **FigureS30. DEGs between development and regeneration**

1298 Spatial visualization of the expression of *JunD*, *Tnc*, *Krt18*, *S100a10*, *Tagln2*, *Tnfsf10* and  
1299 *Ankrd1* in sections of stage 57 and 15 DPI-4.

1300

1301 **TABLE LEGENDS**

1302 **Table S1. Description of all samples profiled, cell types and top 20 marker genes.**

1303 **Table S2. Gene list for cluster annotation.**

1304 **Table S3. Gene list of three gene modules defining NSC, cell cycle and**  
1305 **translation.**

1306 **Table S4. Gene list of two gene modules in REARGC from 2 to 20 DPI.**

1307 **Table S5. Gene list of the eight patterned groups during development and**  
1308 **regeneration processes.**

1309 **Table S6. DEGs of left dorsal pallium region between regeneration and**  
1310 **development.**

1311 **Table S7. Primer sequences for ISH.**

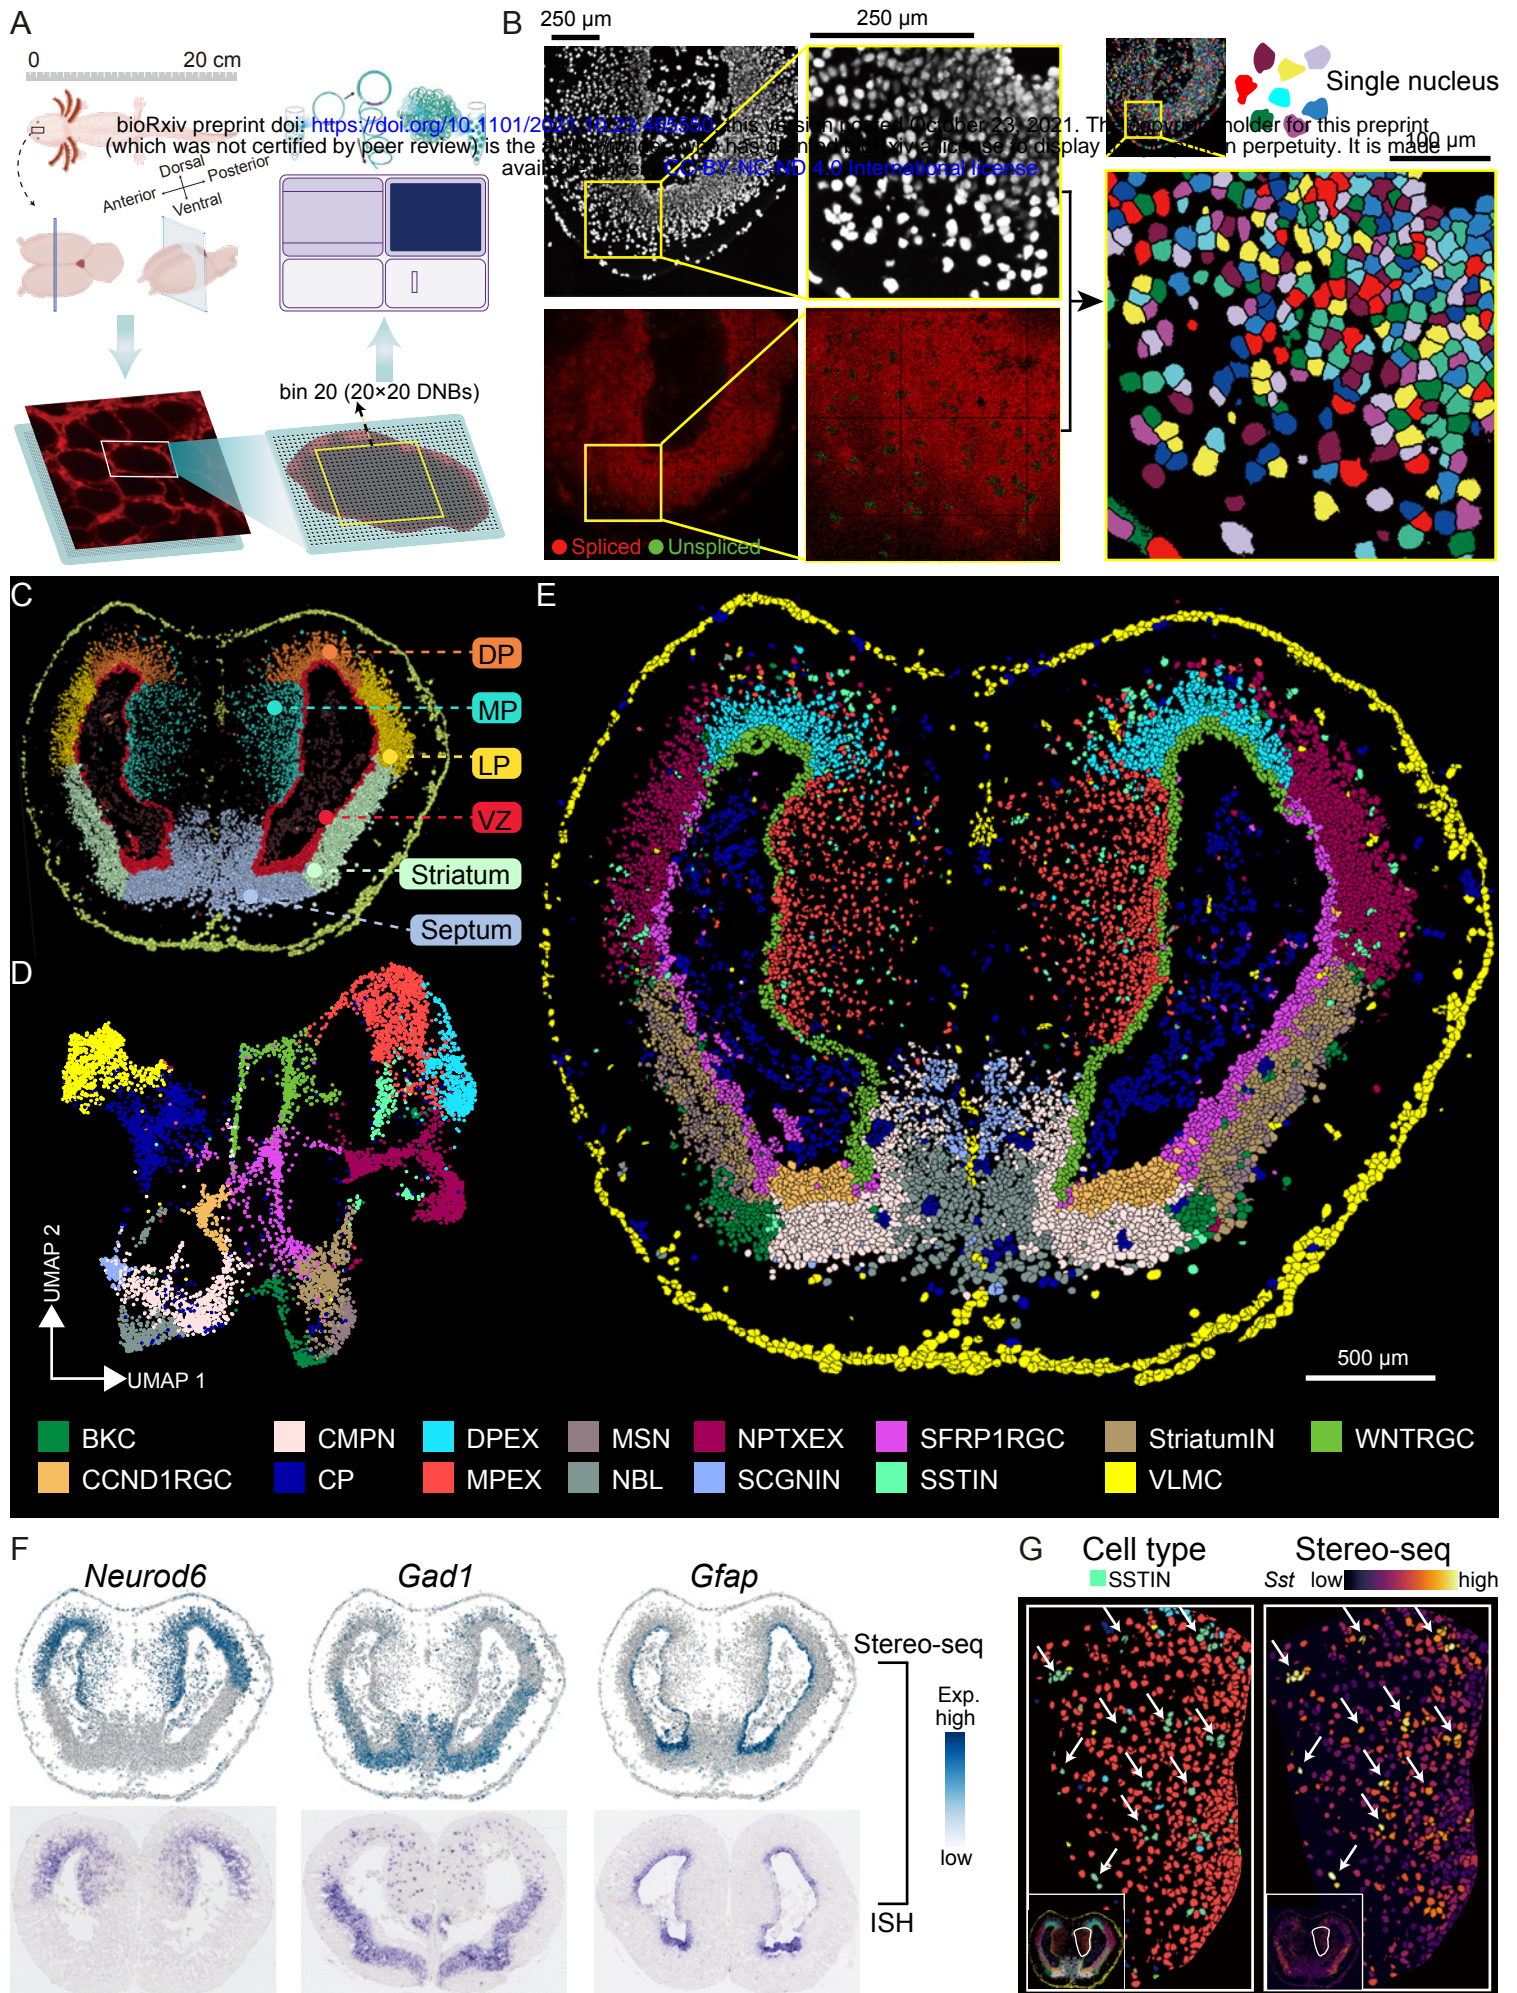

Figure 1



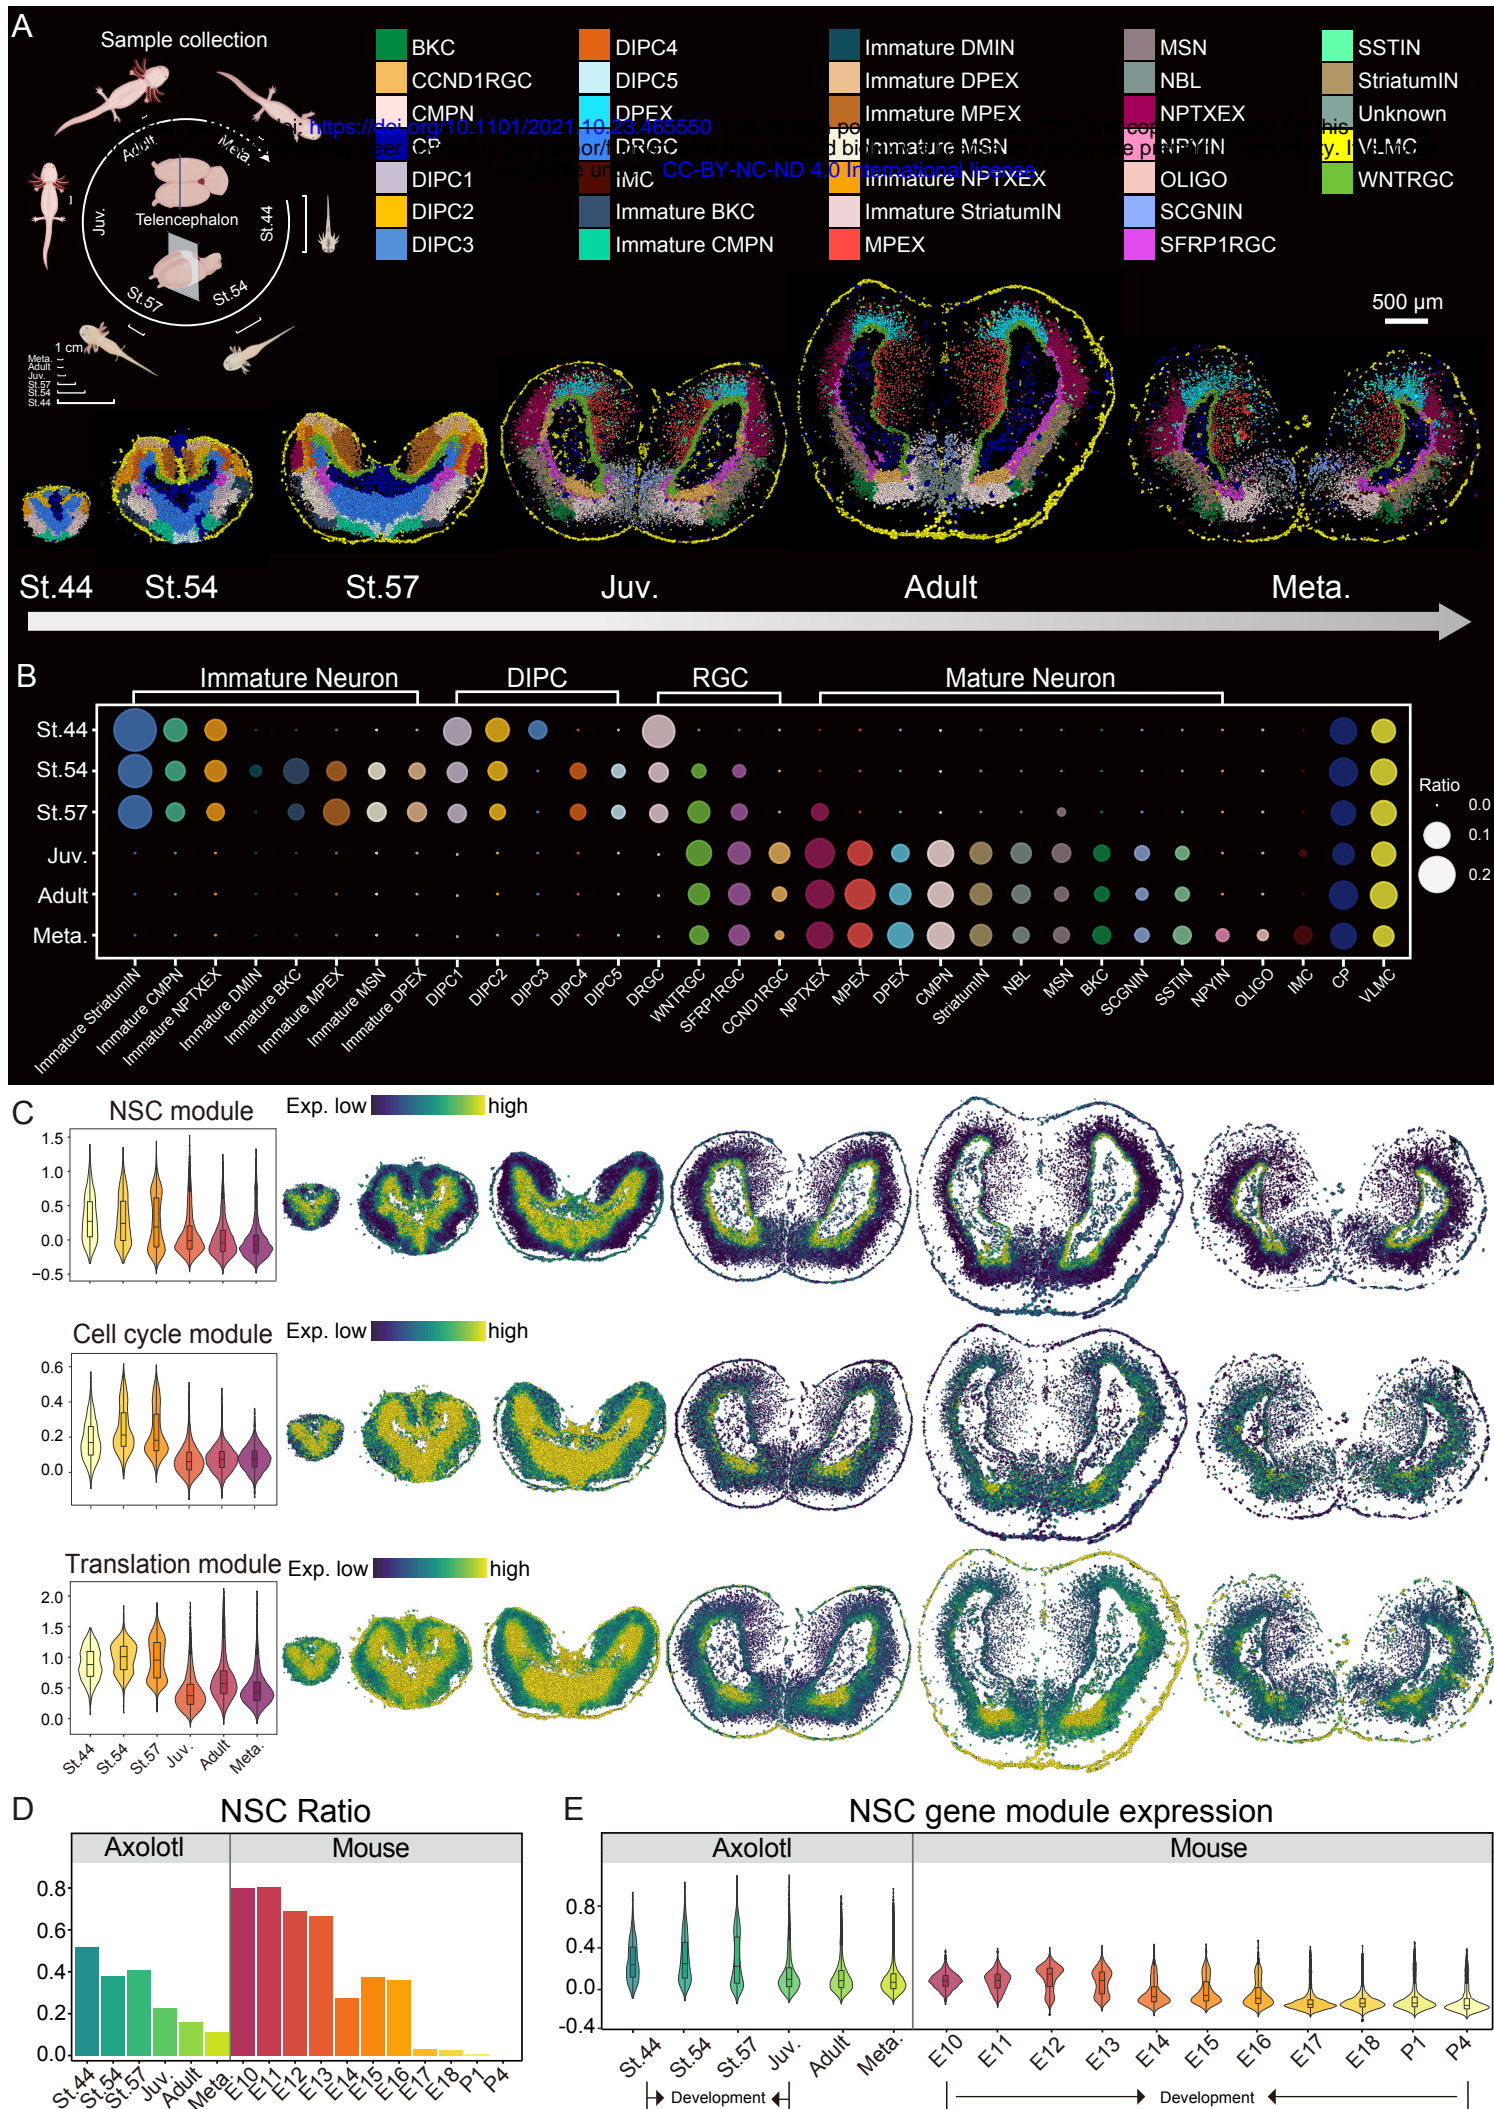

Figure 2

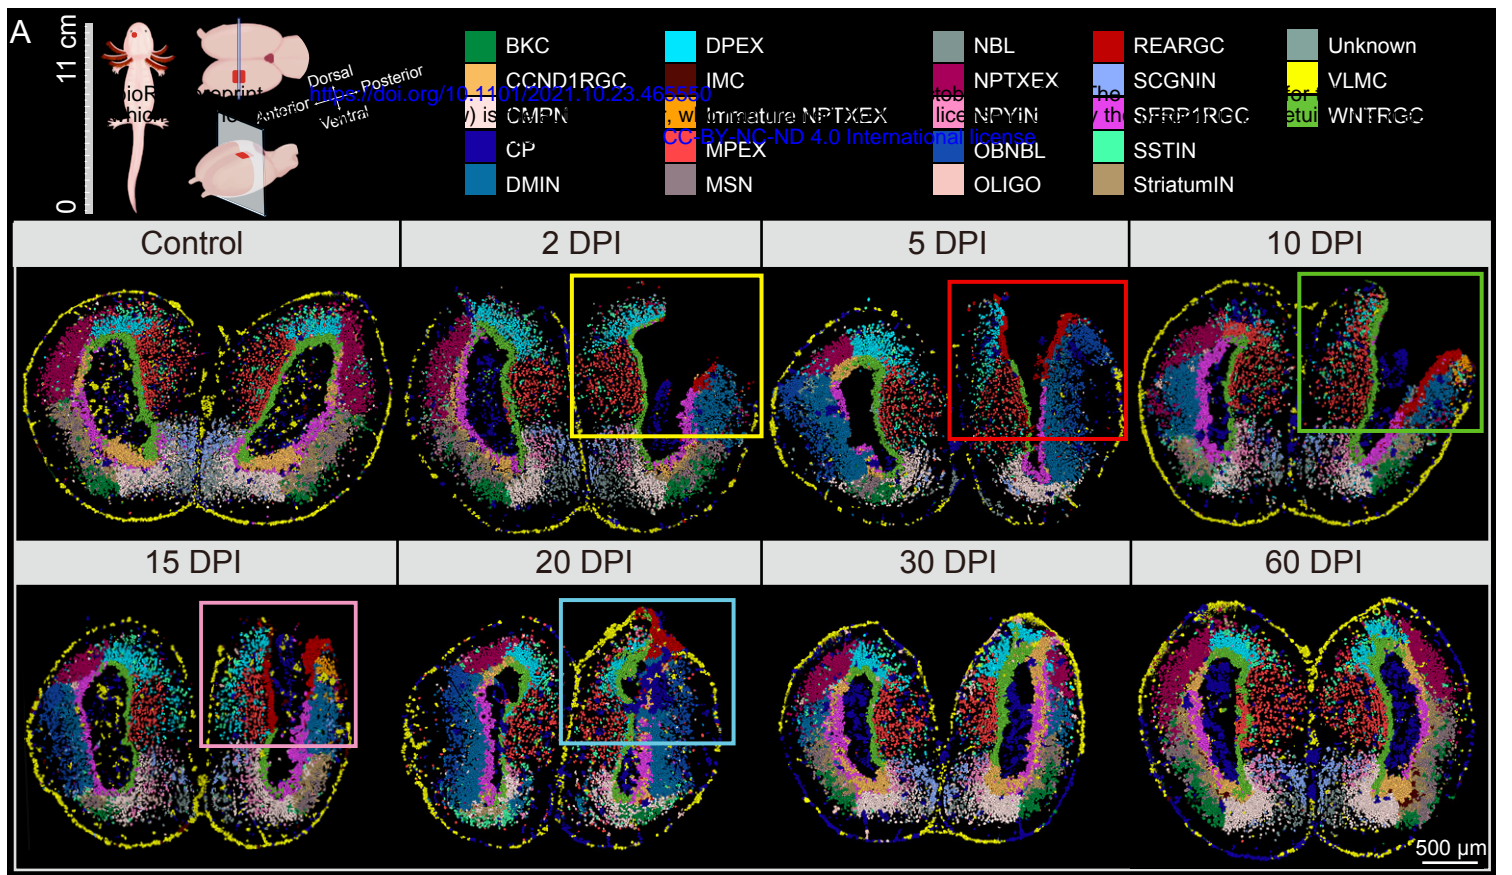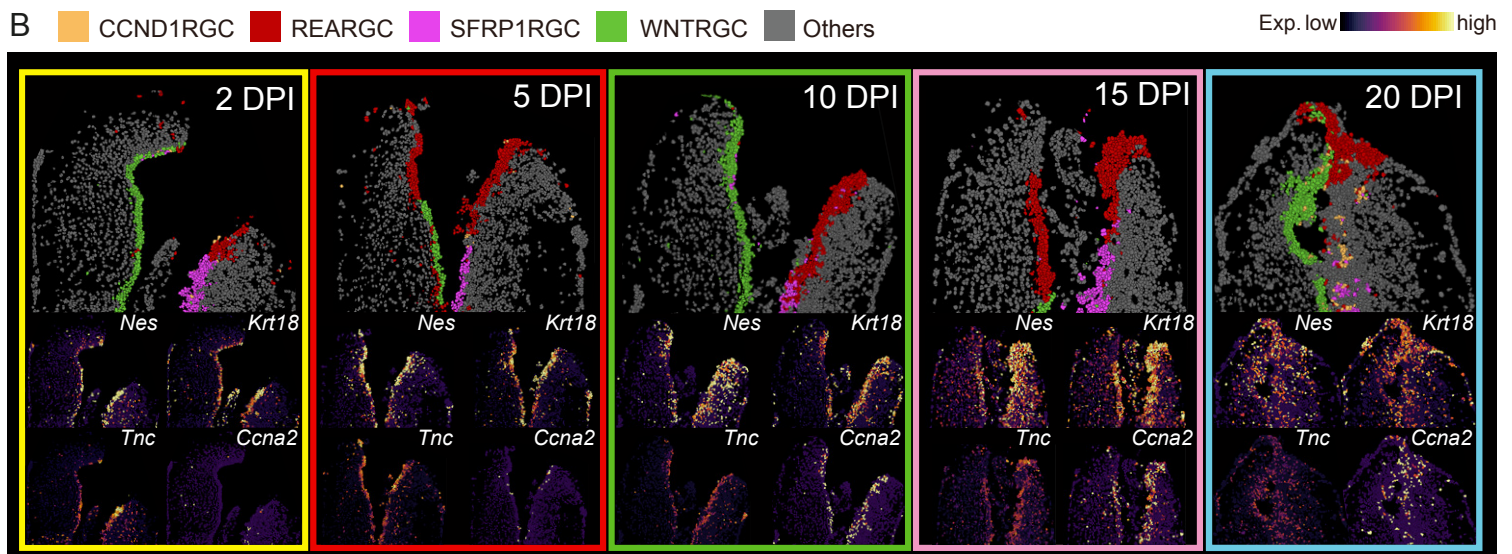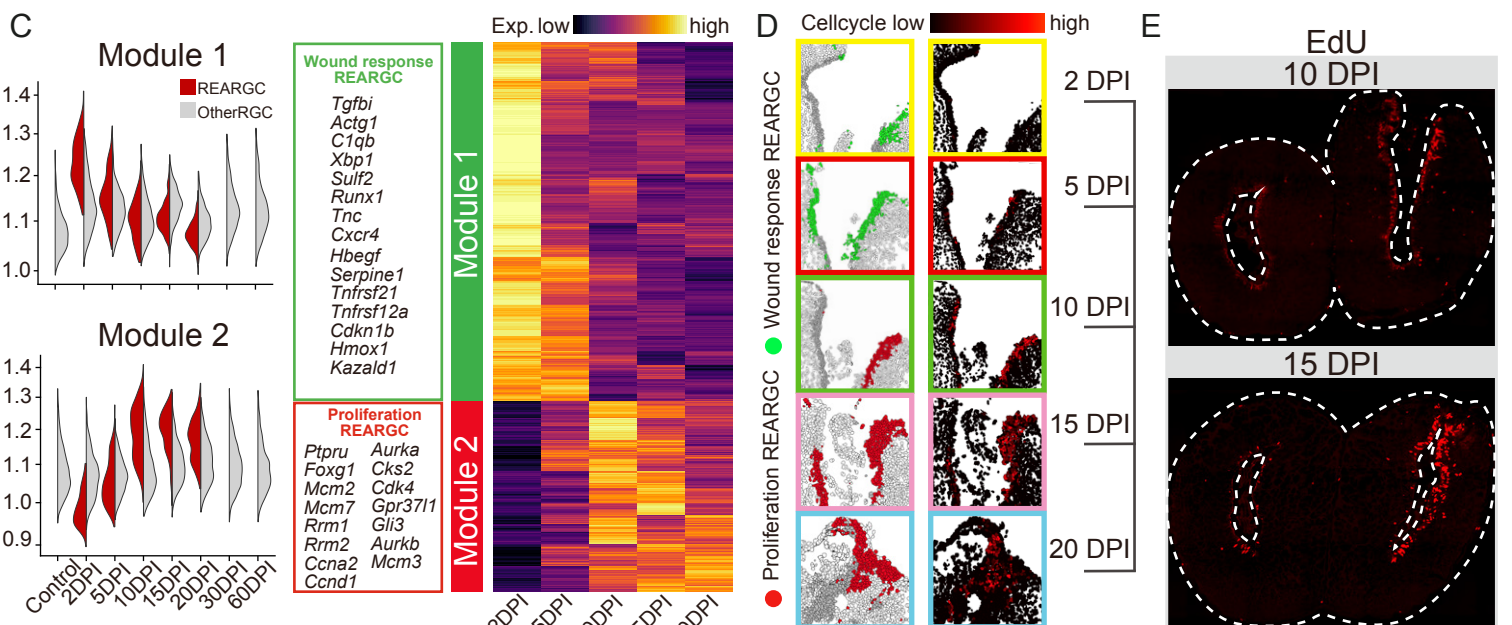

Figure 3

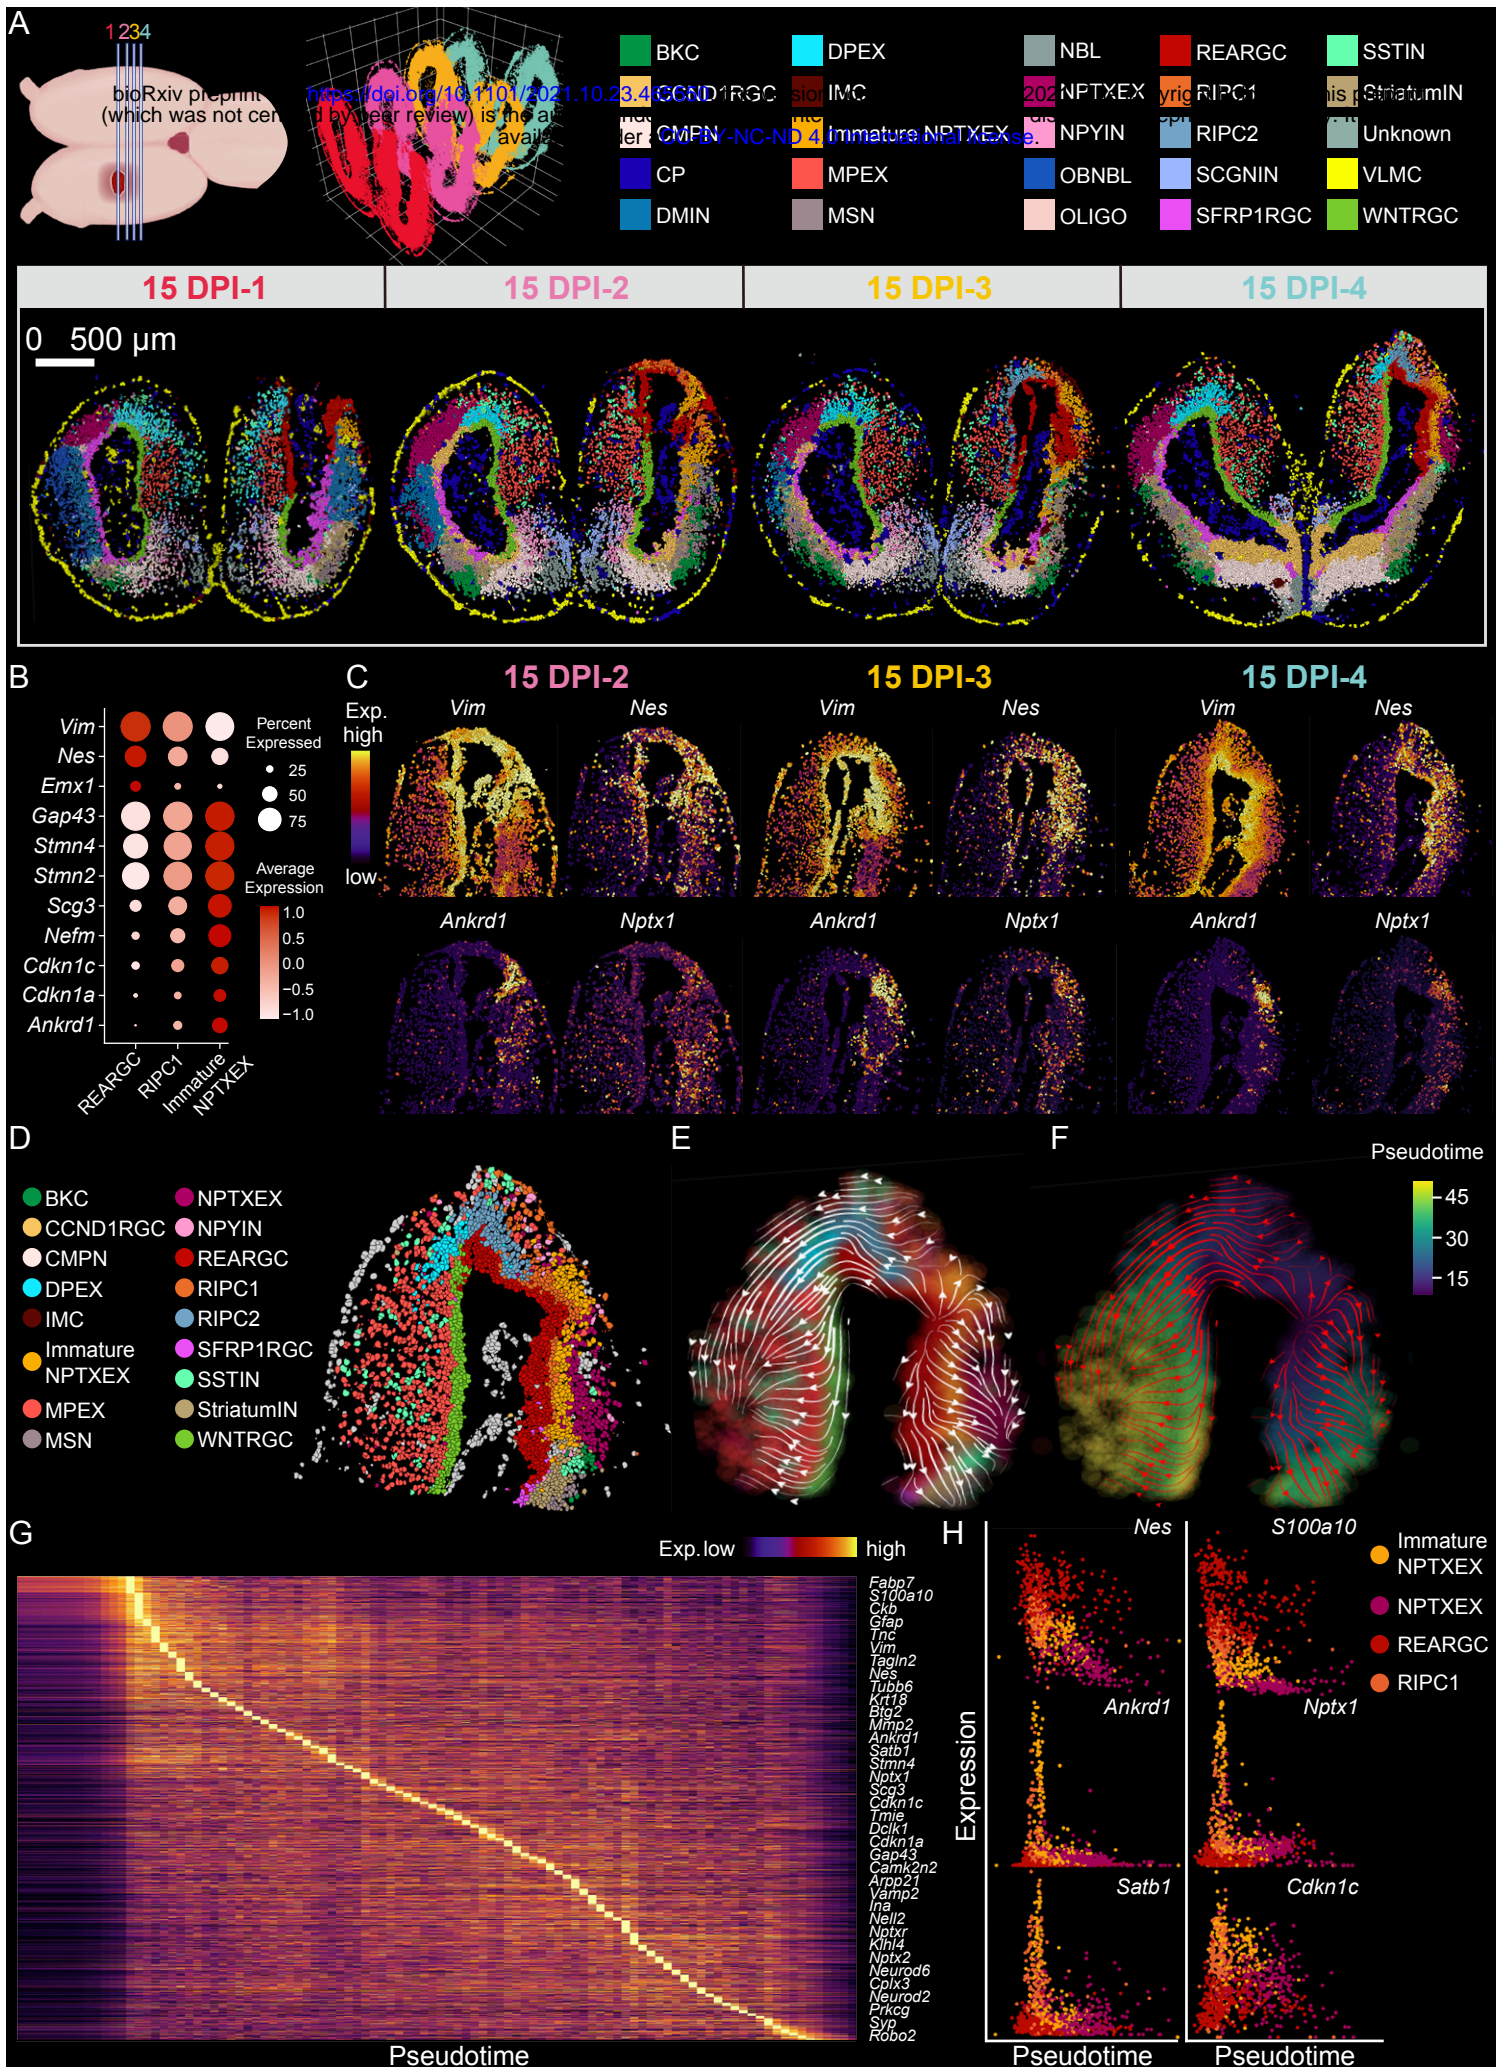

Figure 4

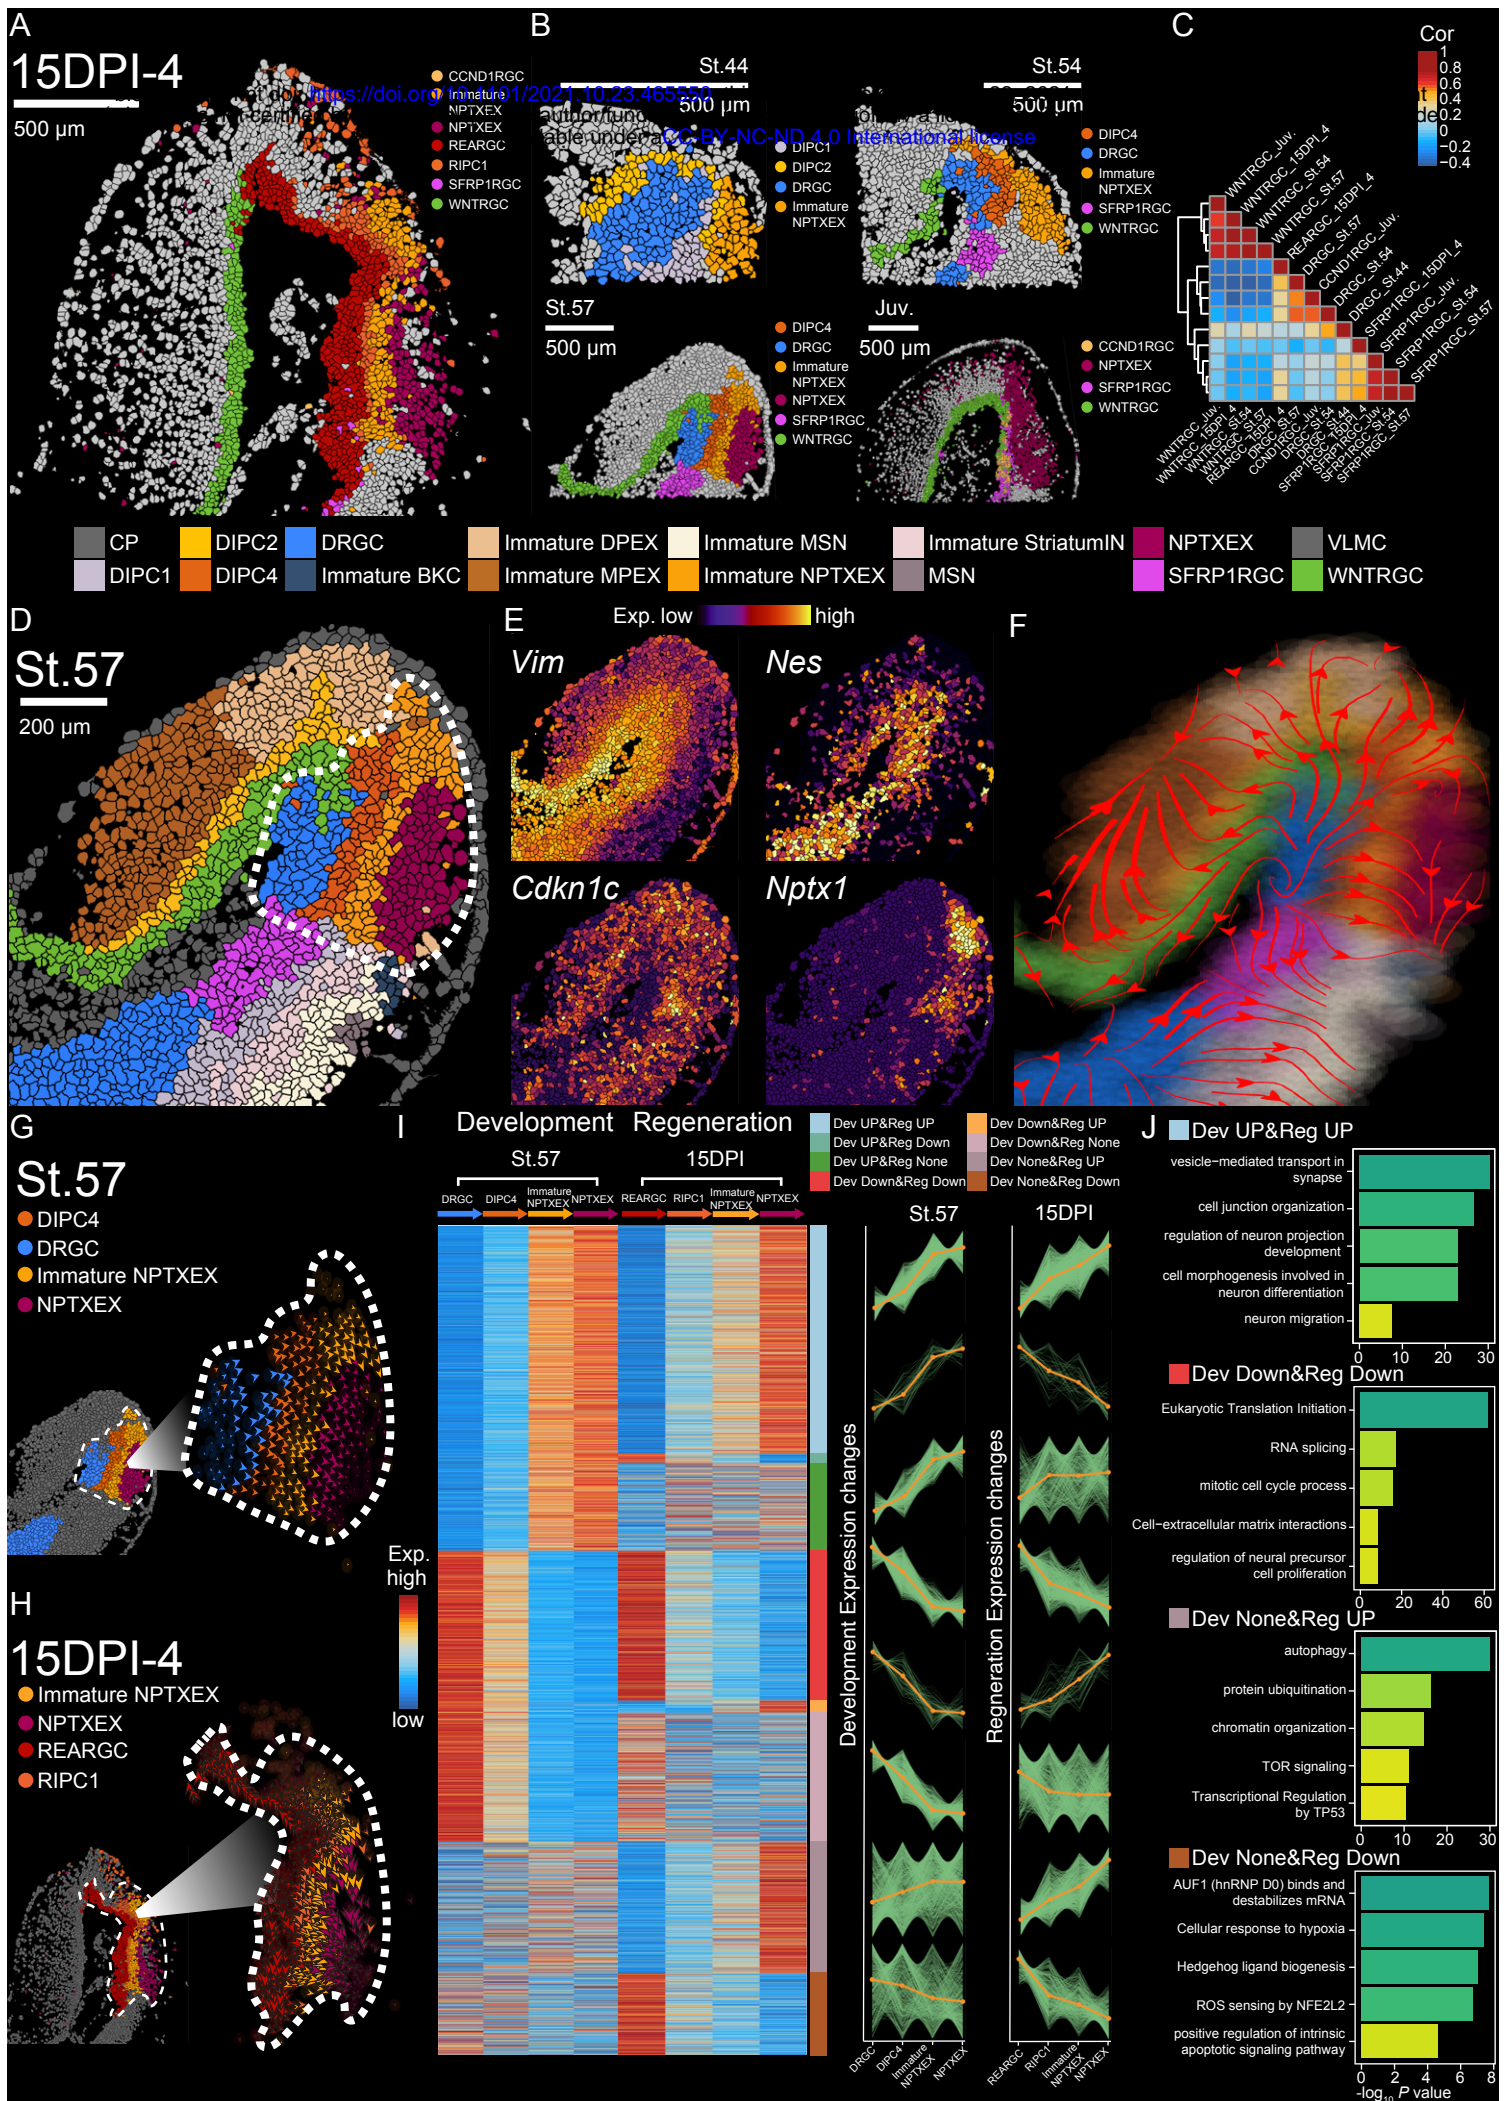

Figure 5

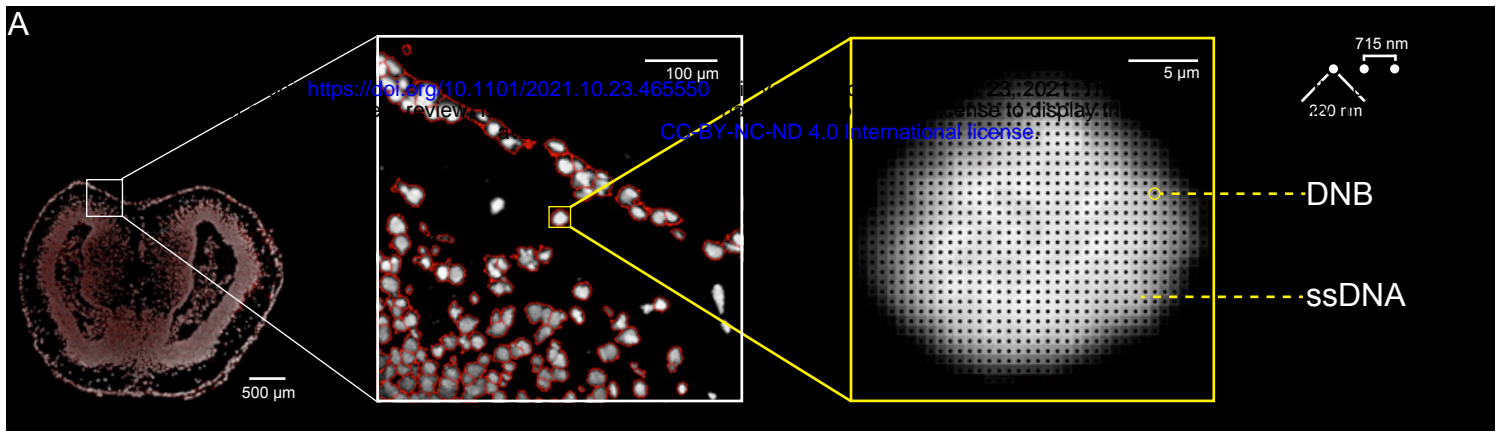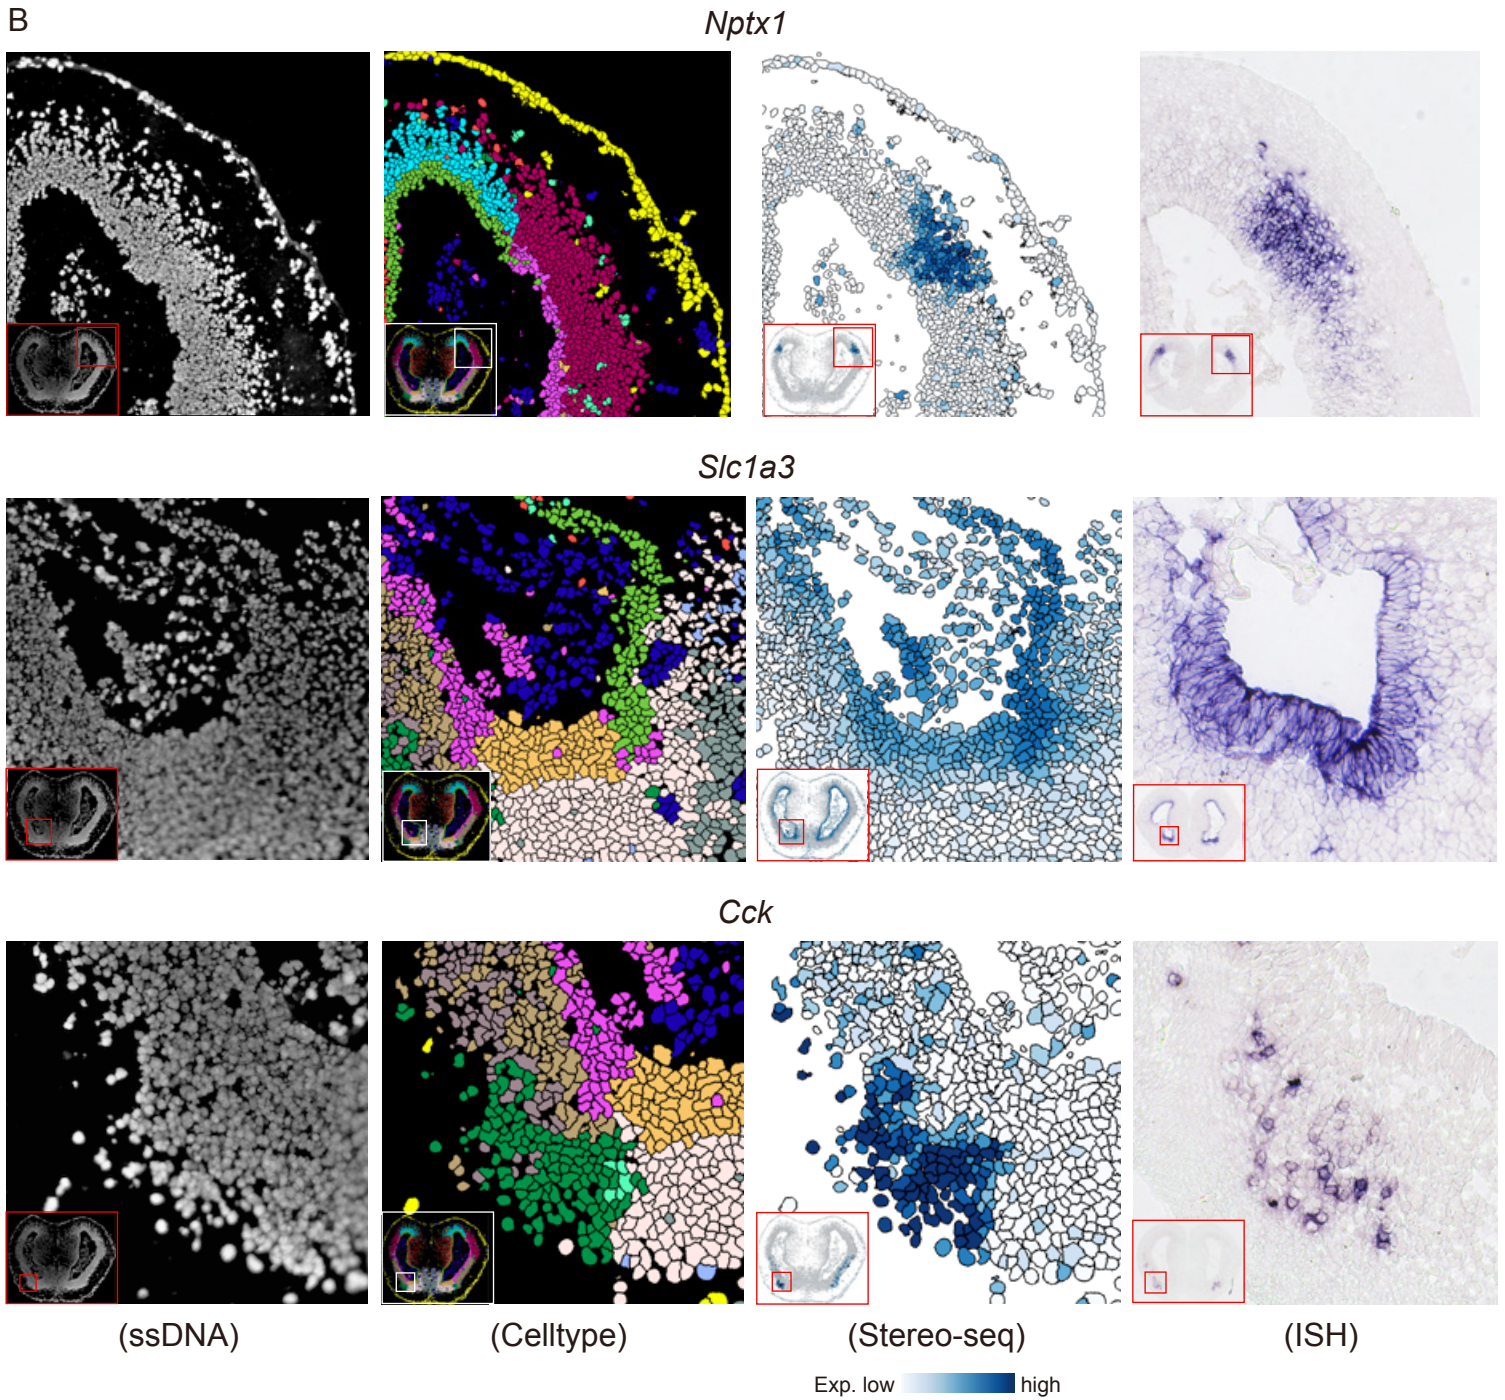

Figure S1



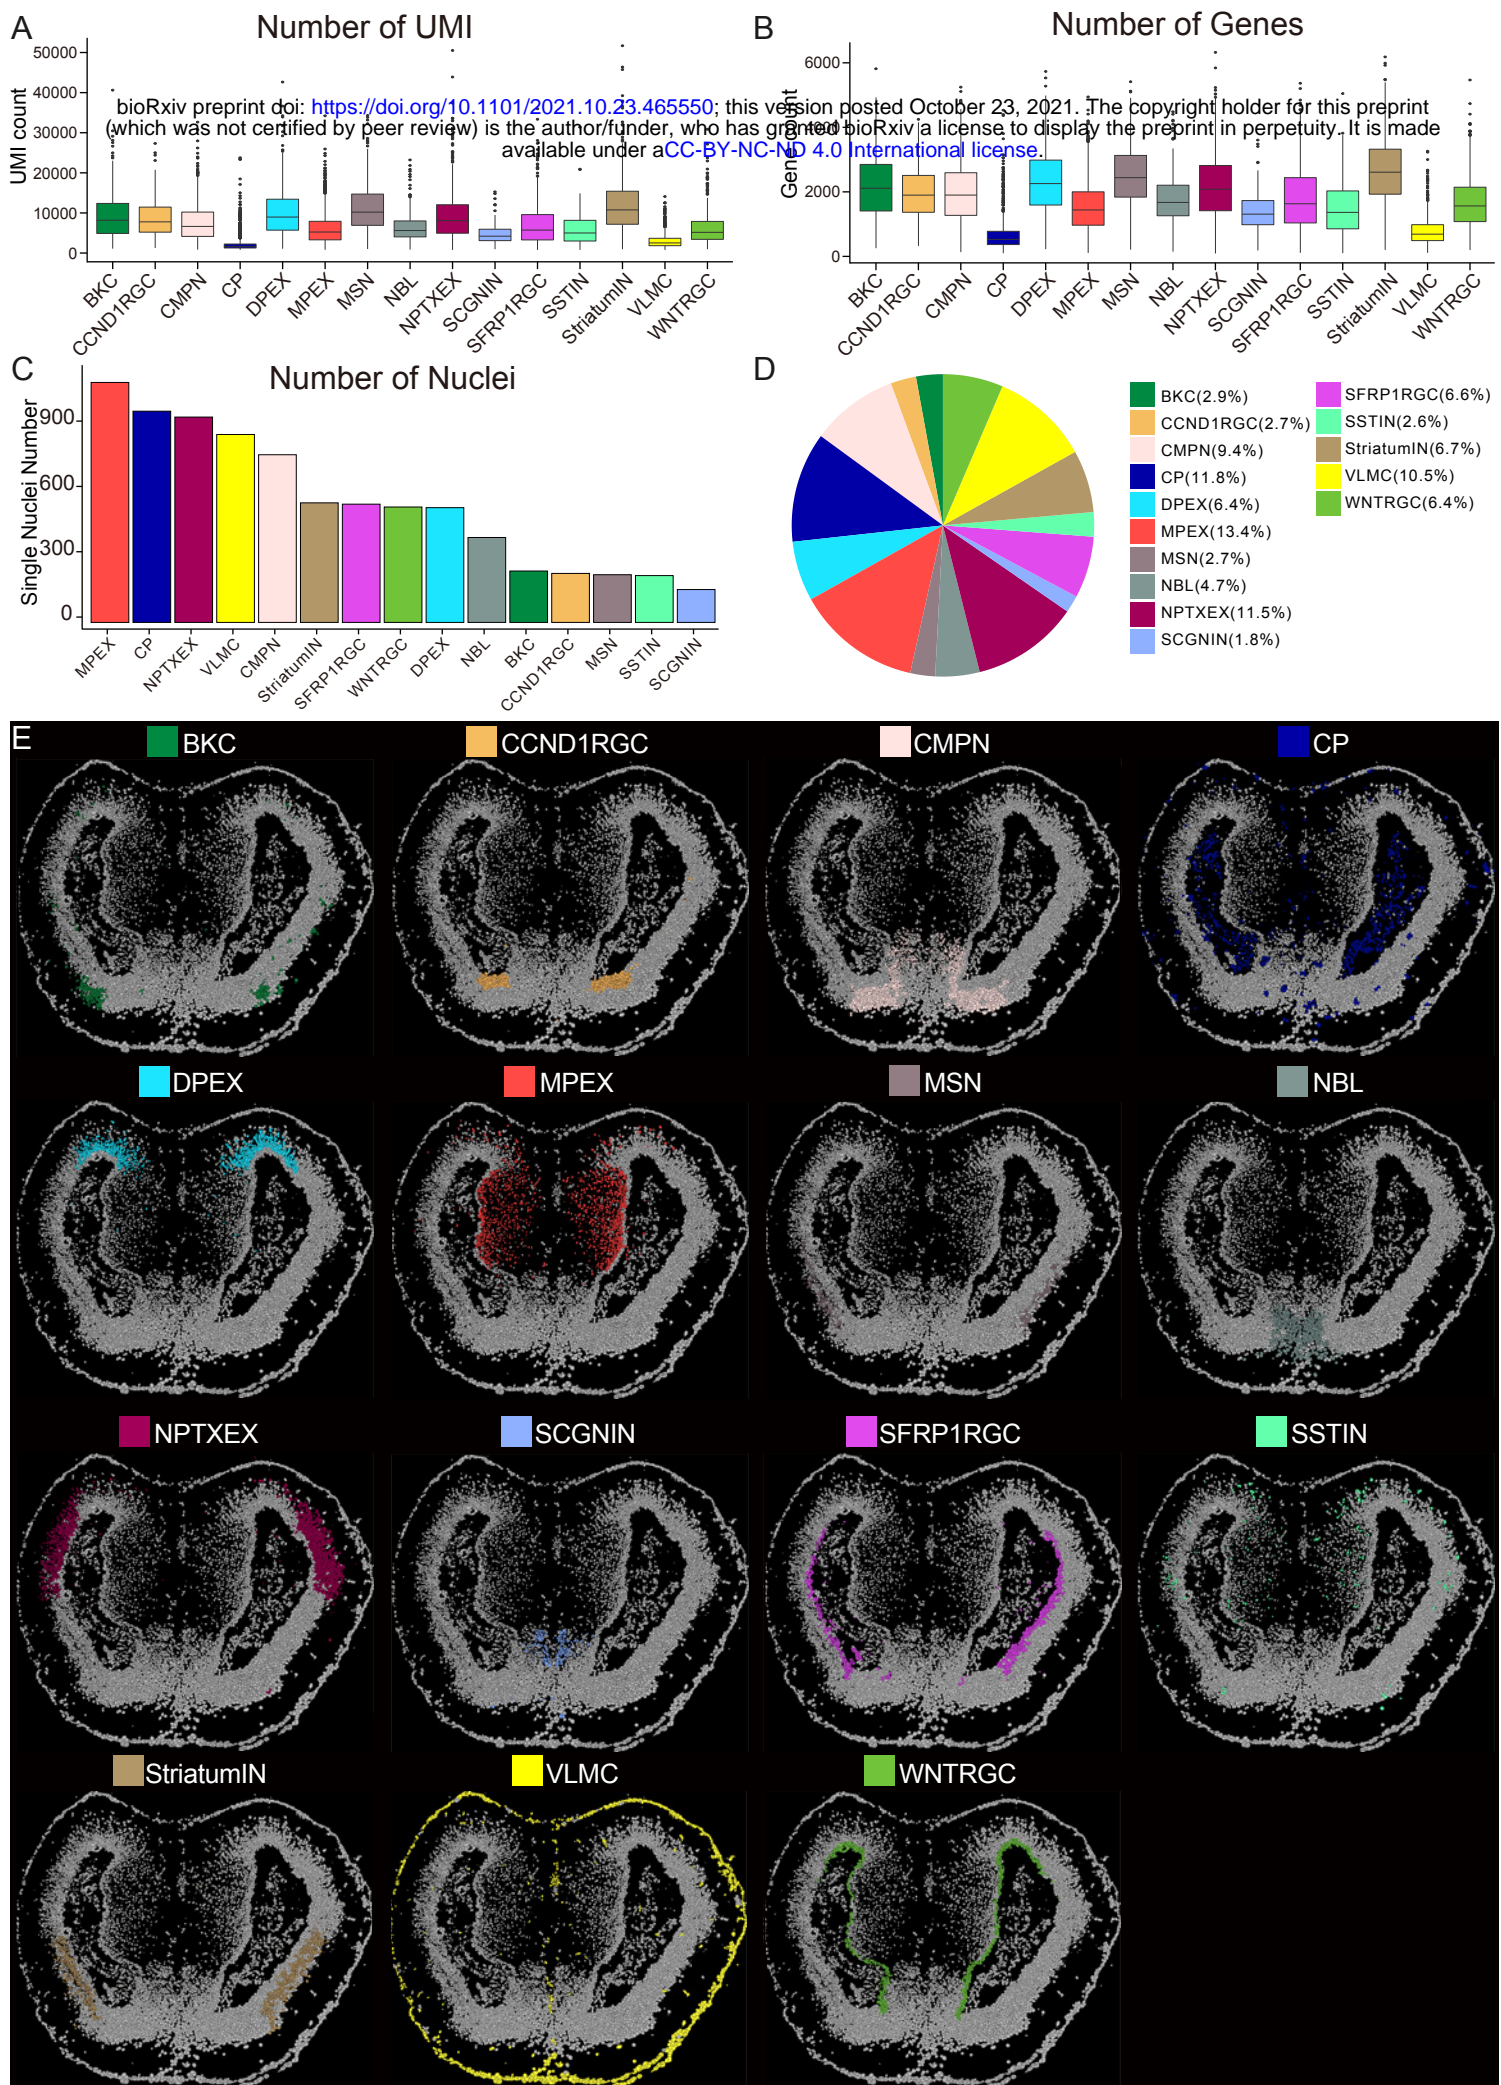

Figure S3

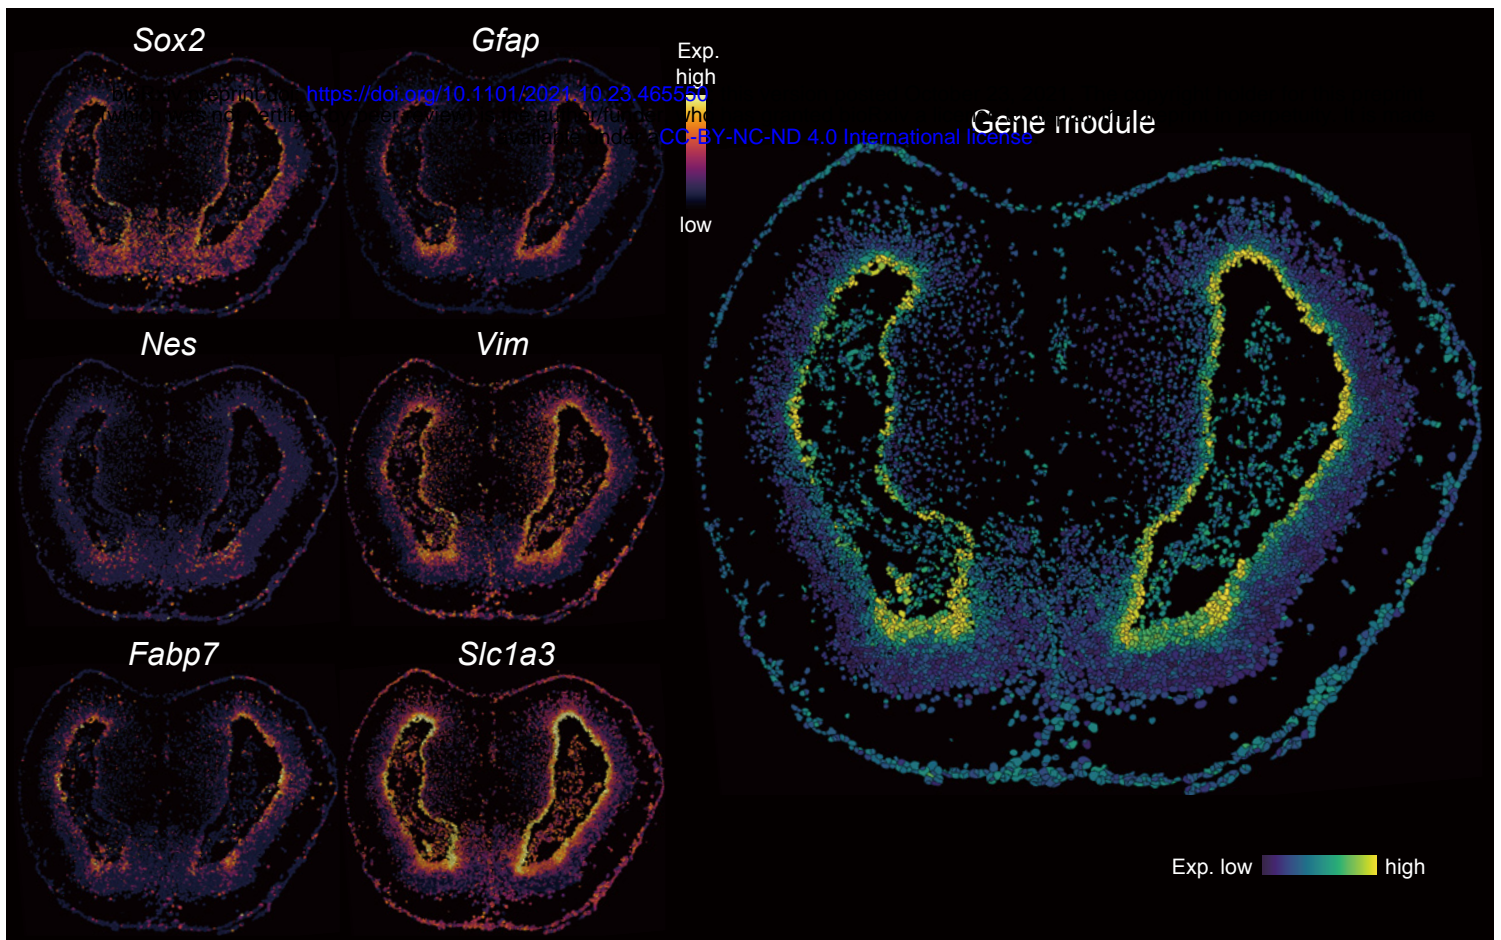

Figure S4







# St.44

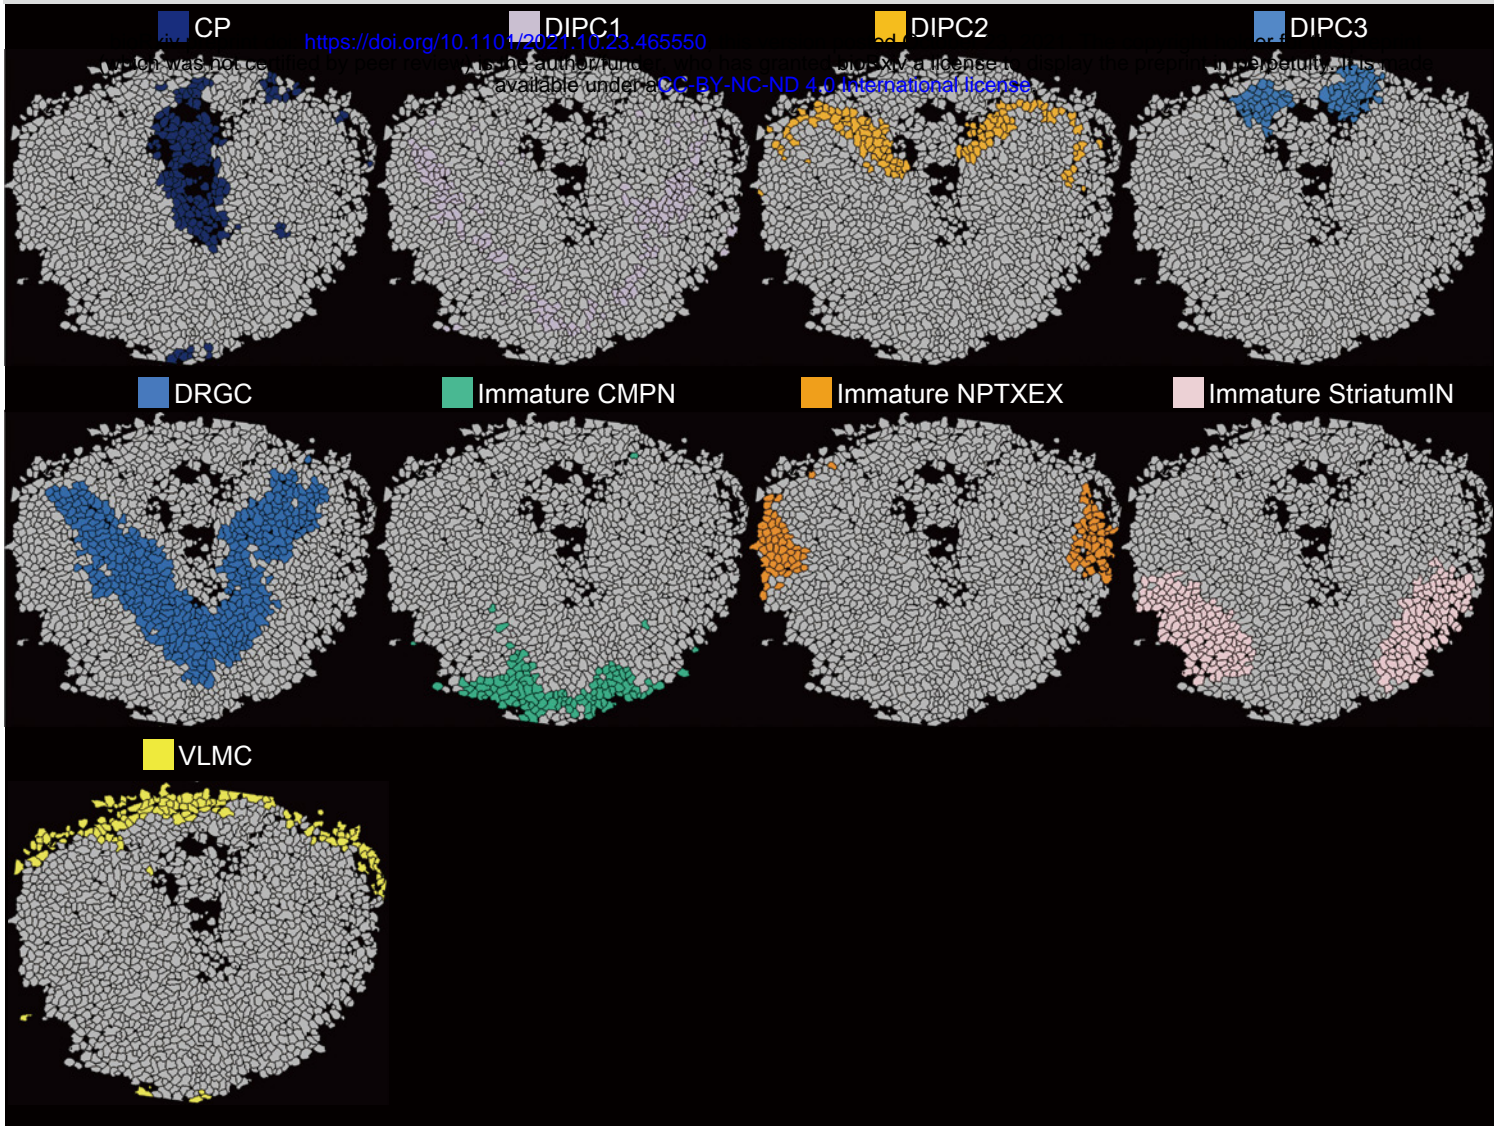

Figure S7

<https://doi.org/10.1101/2021.10.29.465550>

available under a [CC-BY-NC-ND 4.0 International license](https://creativecommons.org/licenses/by-nc-nd/4.0/)

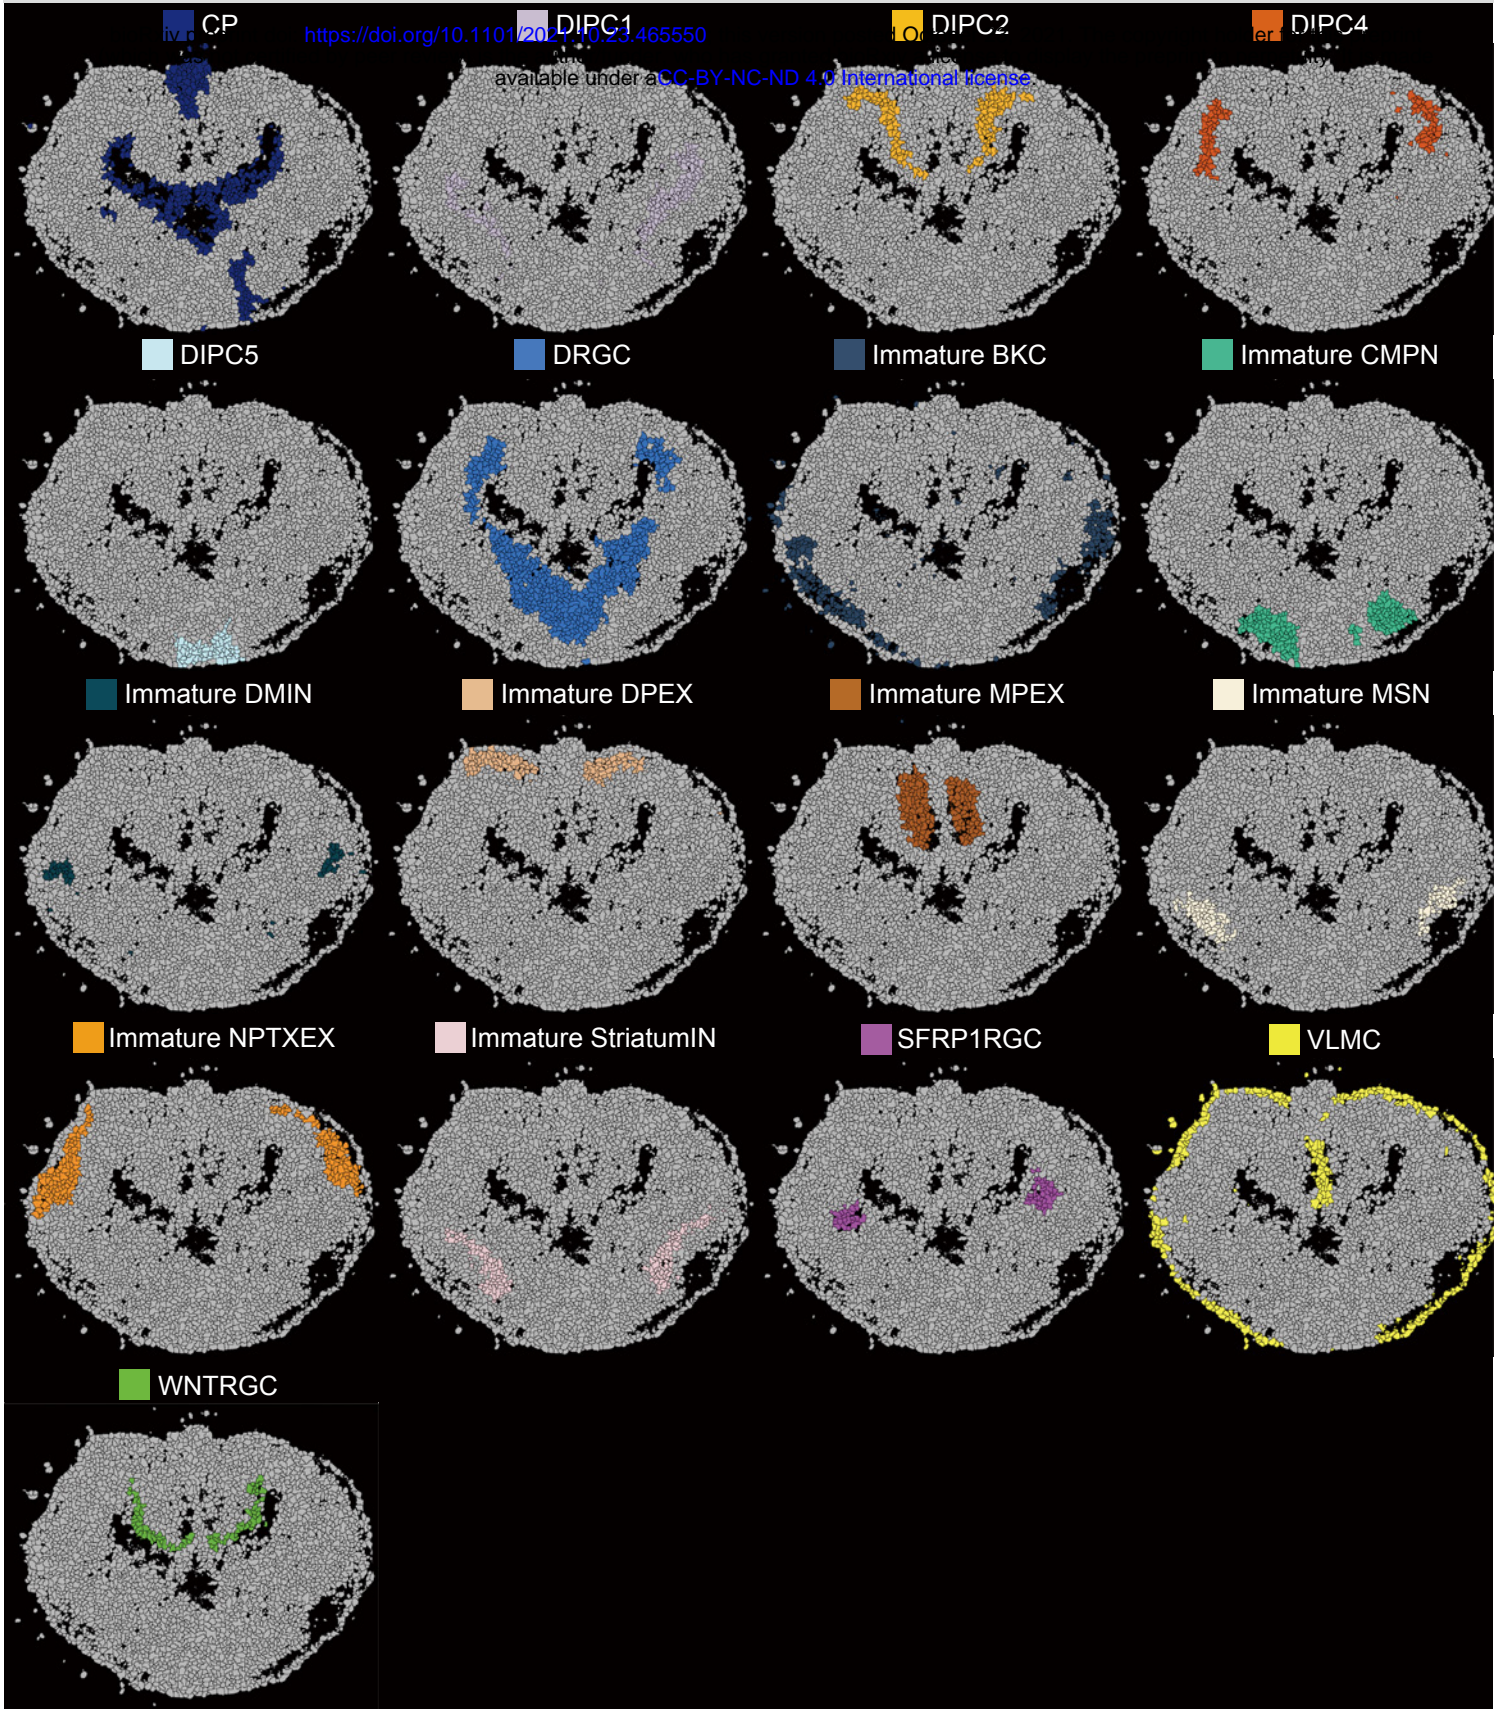

Figure S8

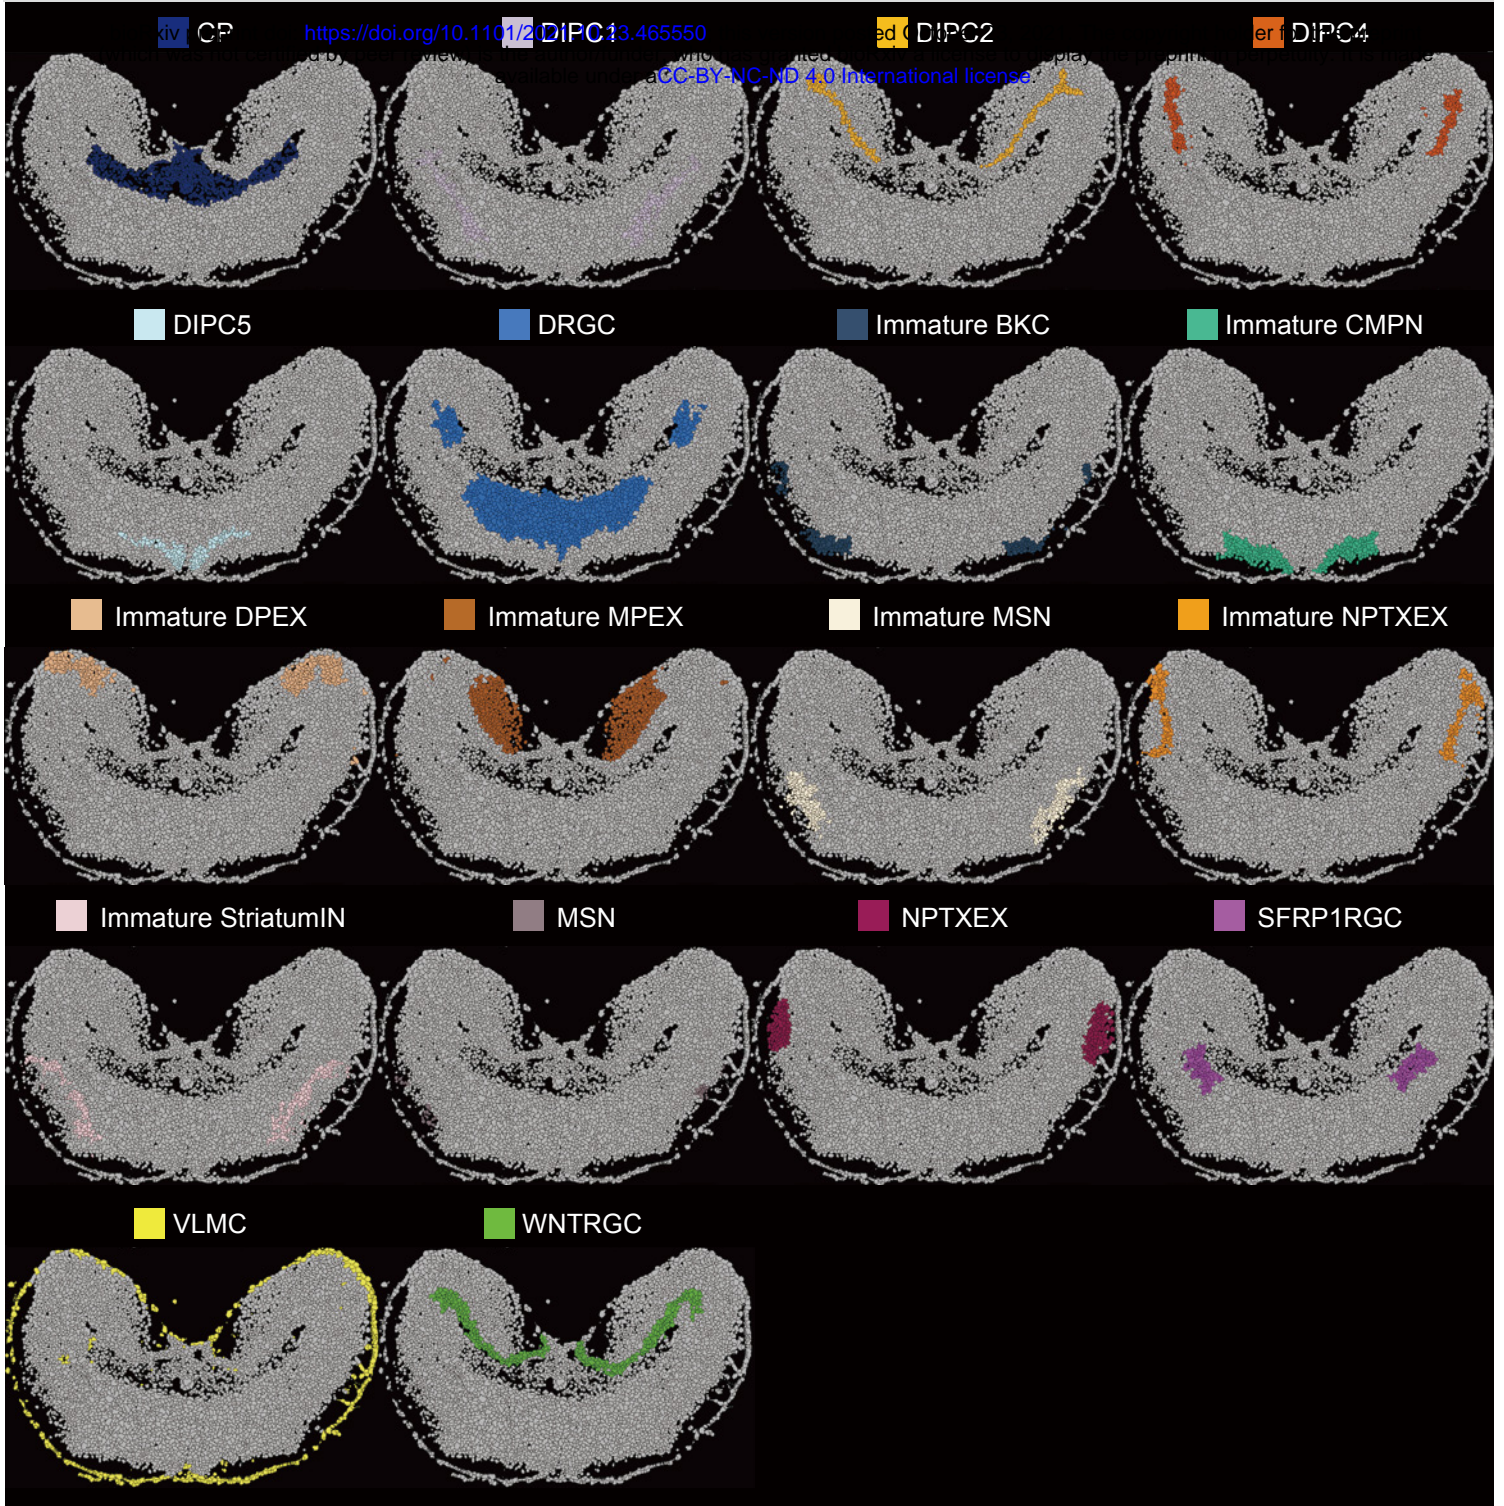

Figure S9

Juv.

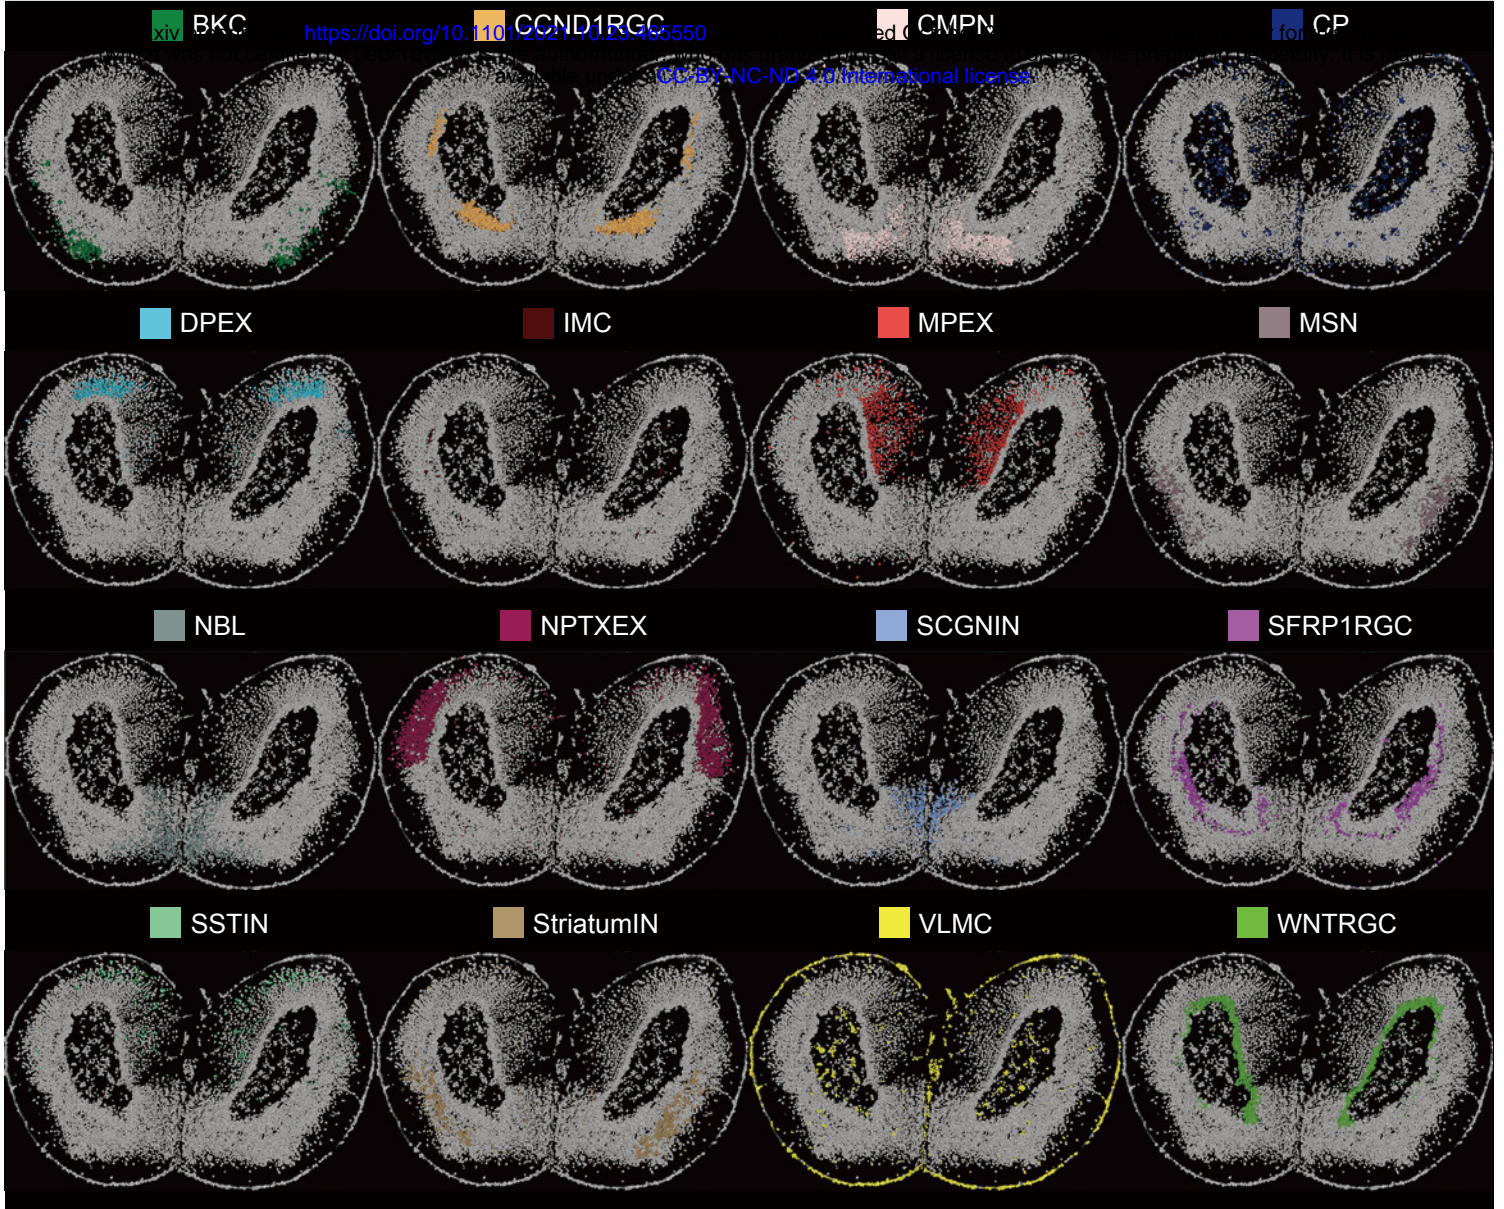

Figure S10

# Meta.

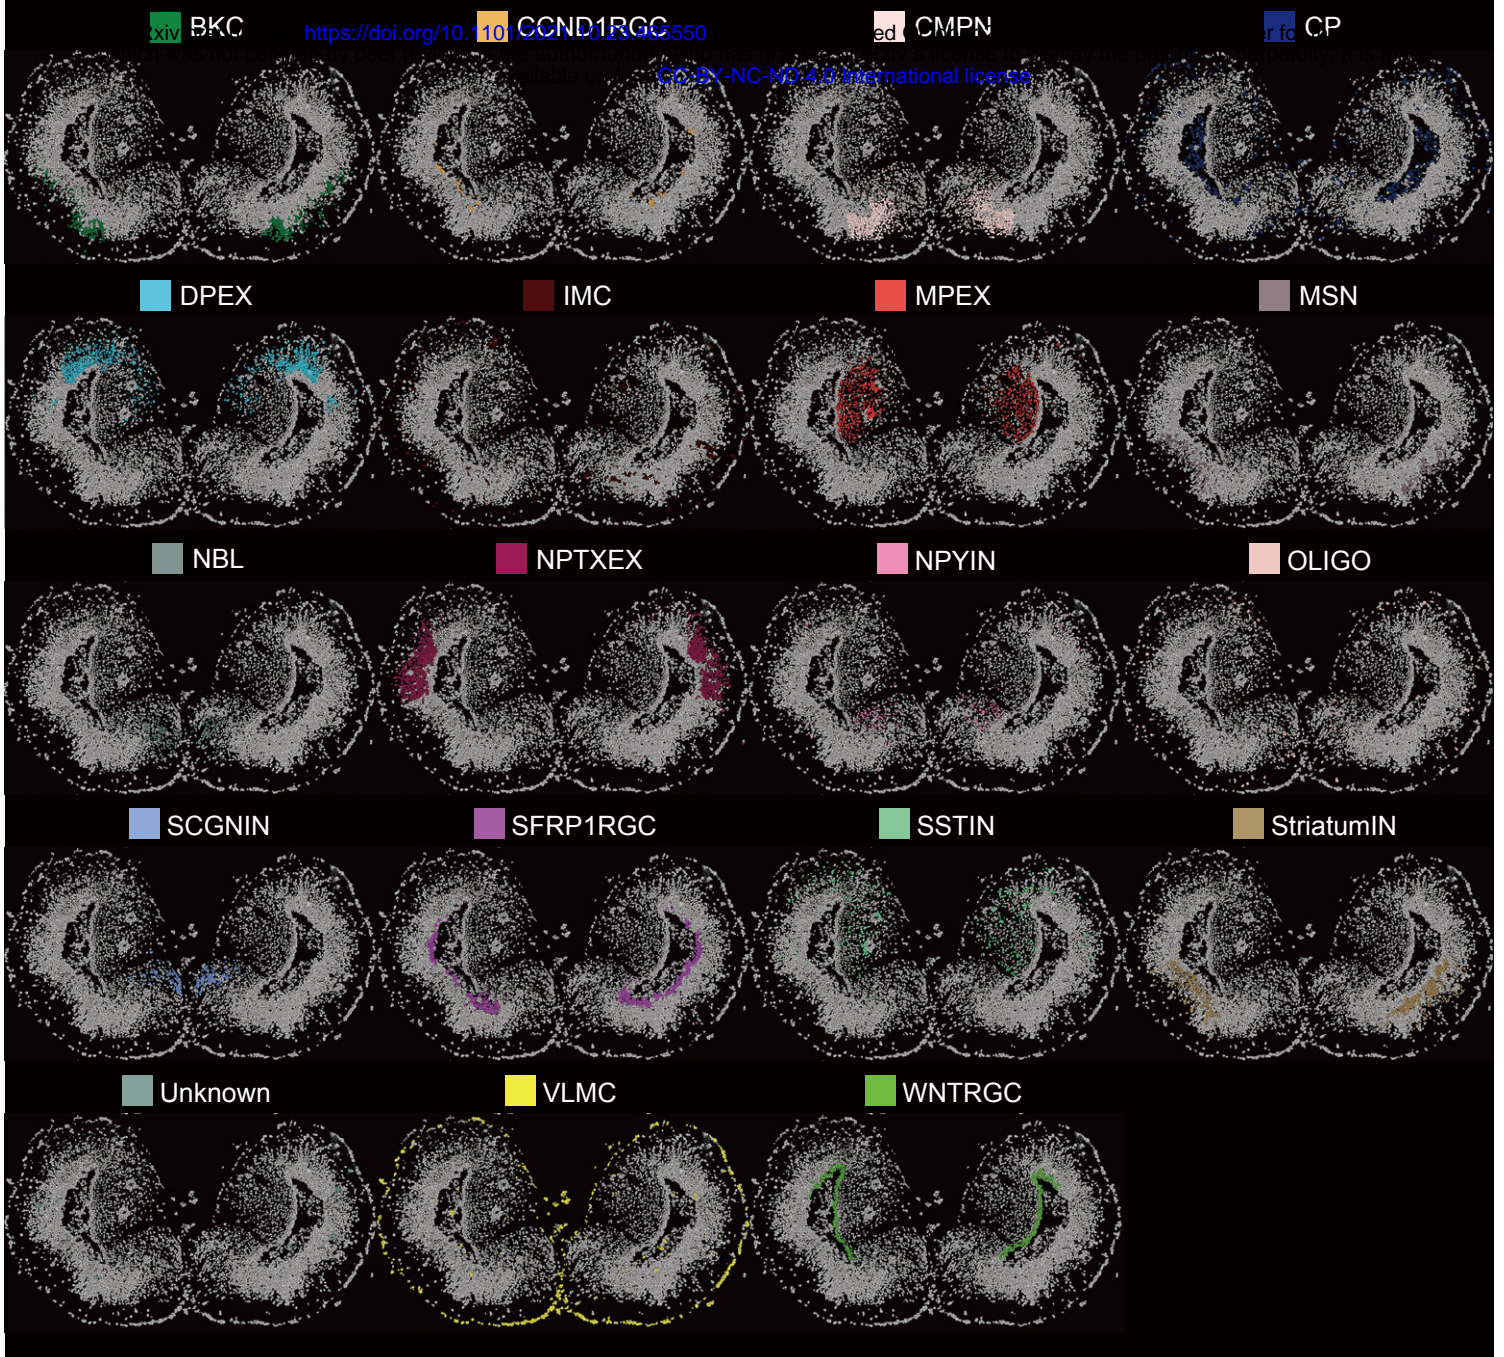

Figure S11

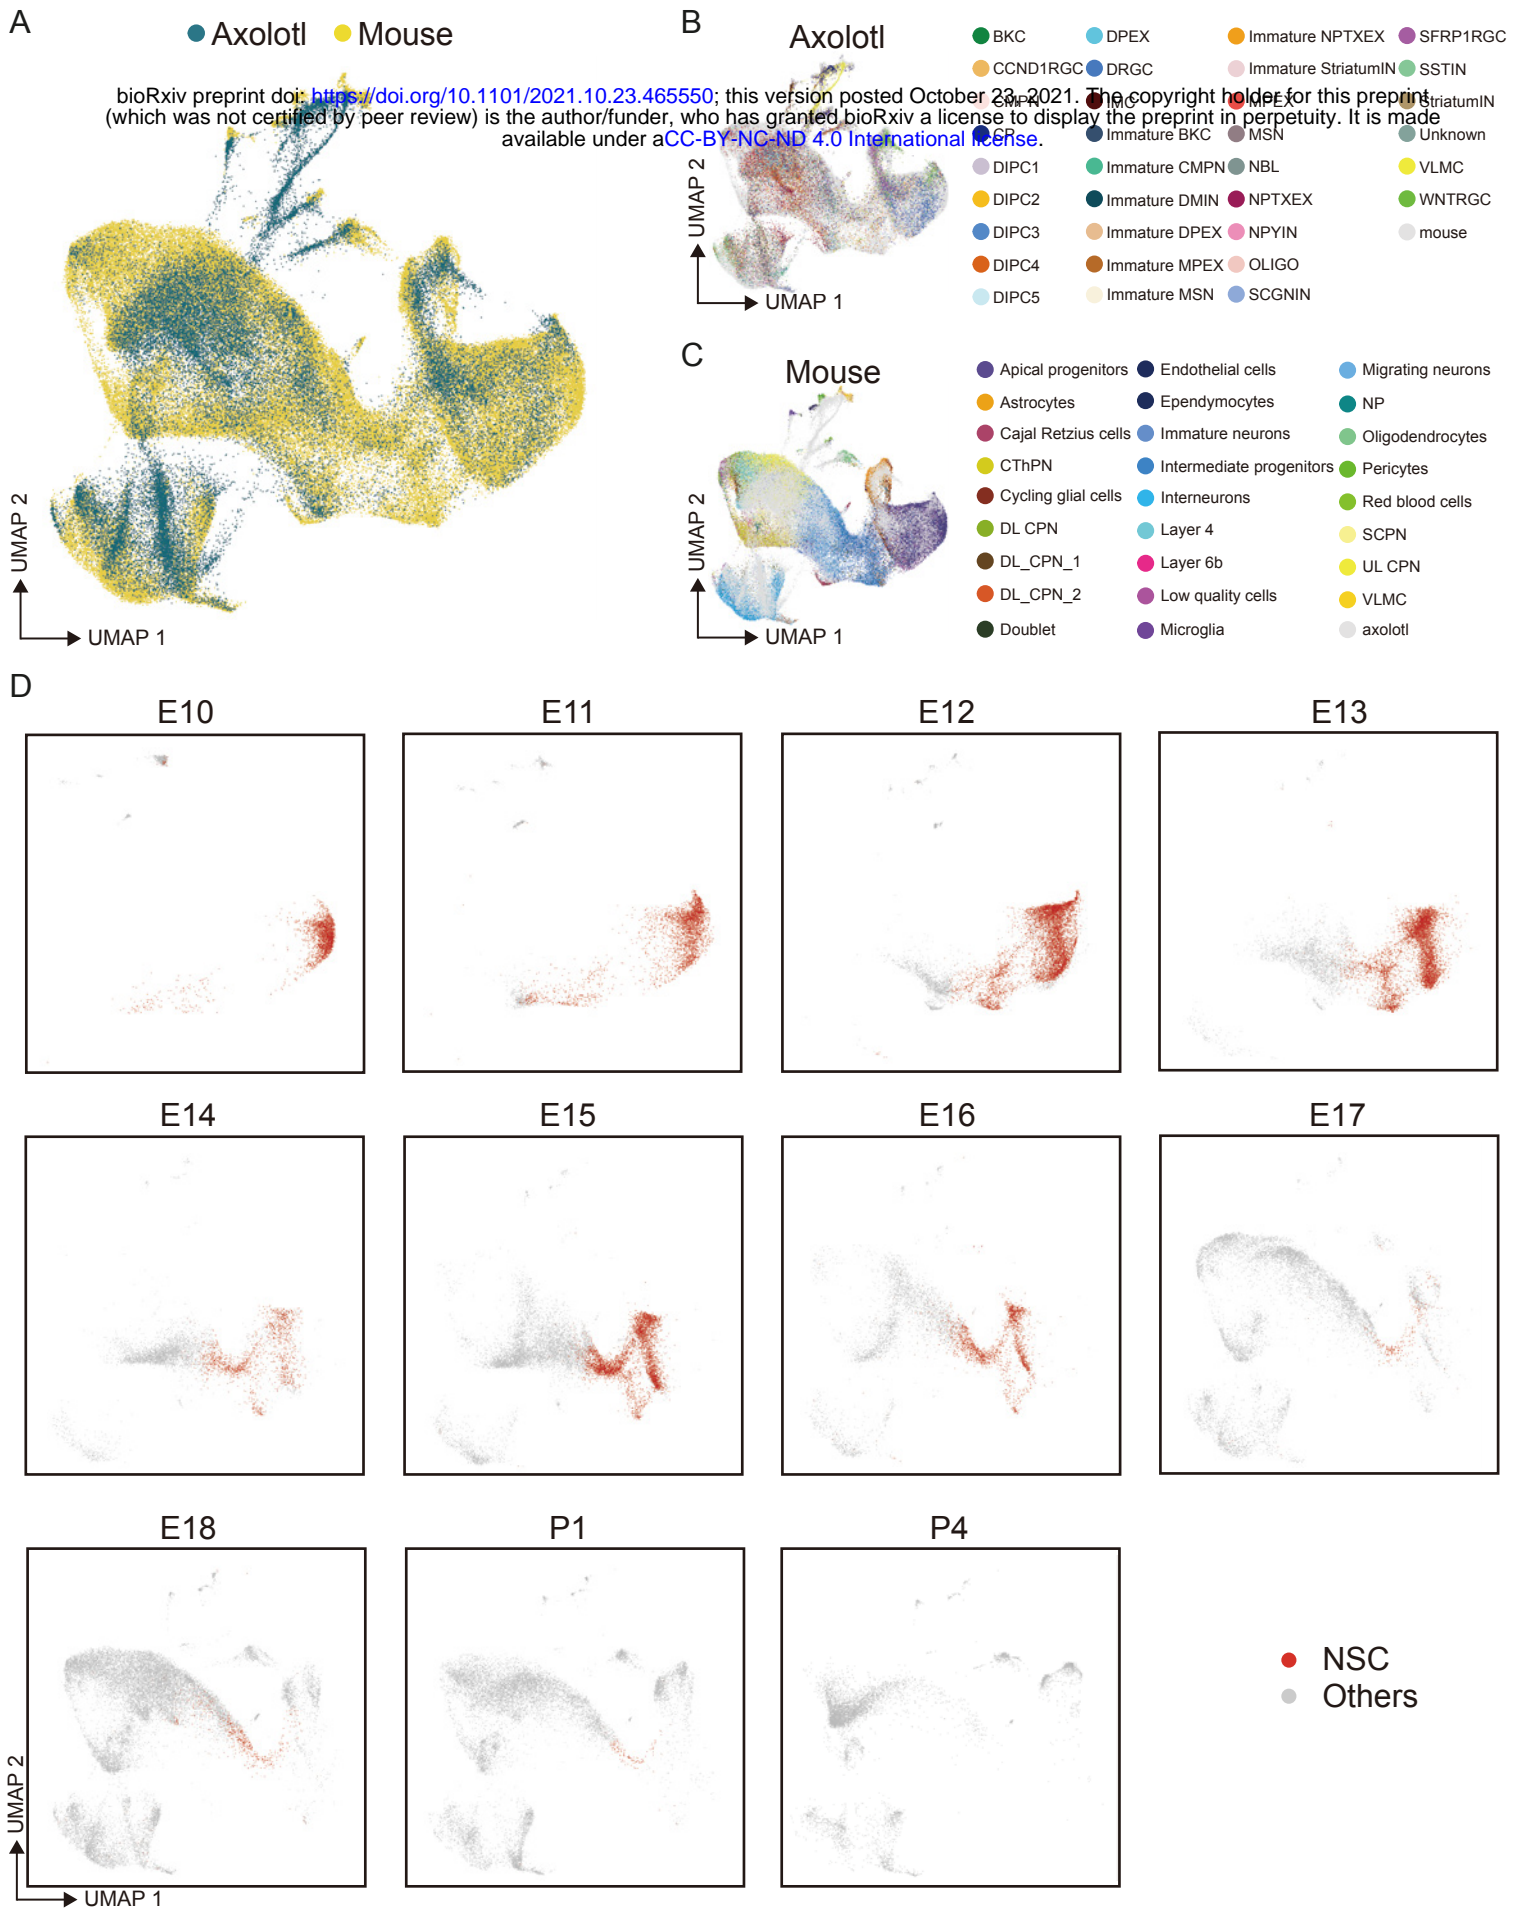

Figure S12



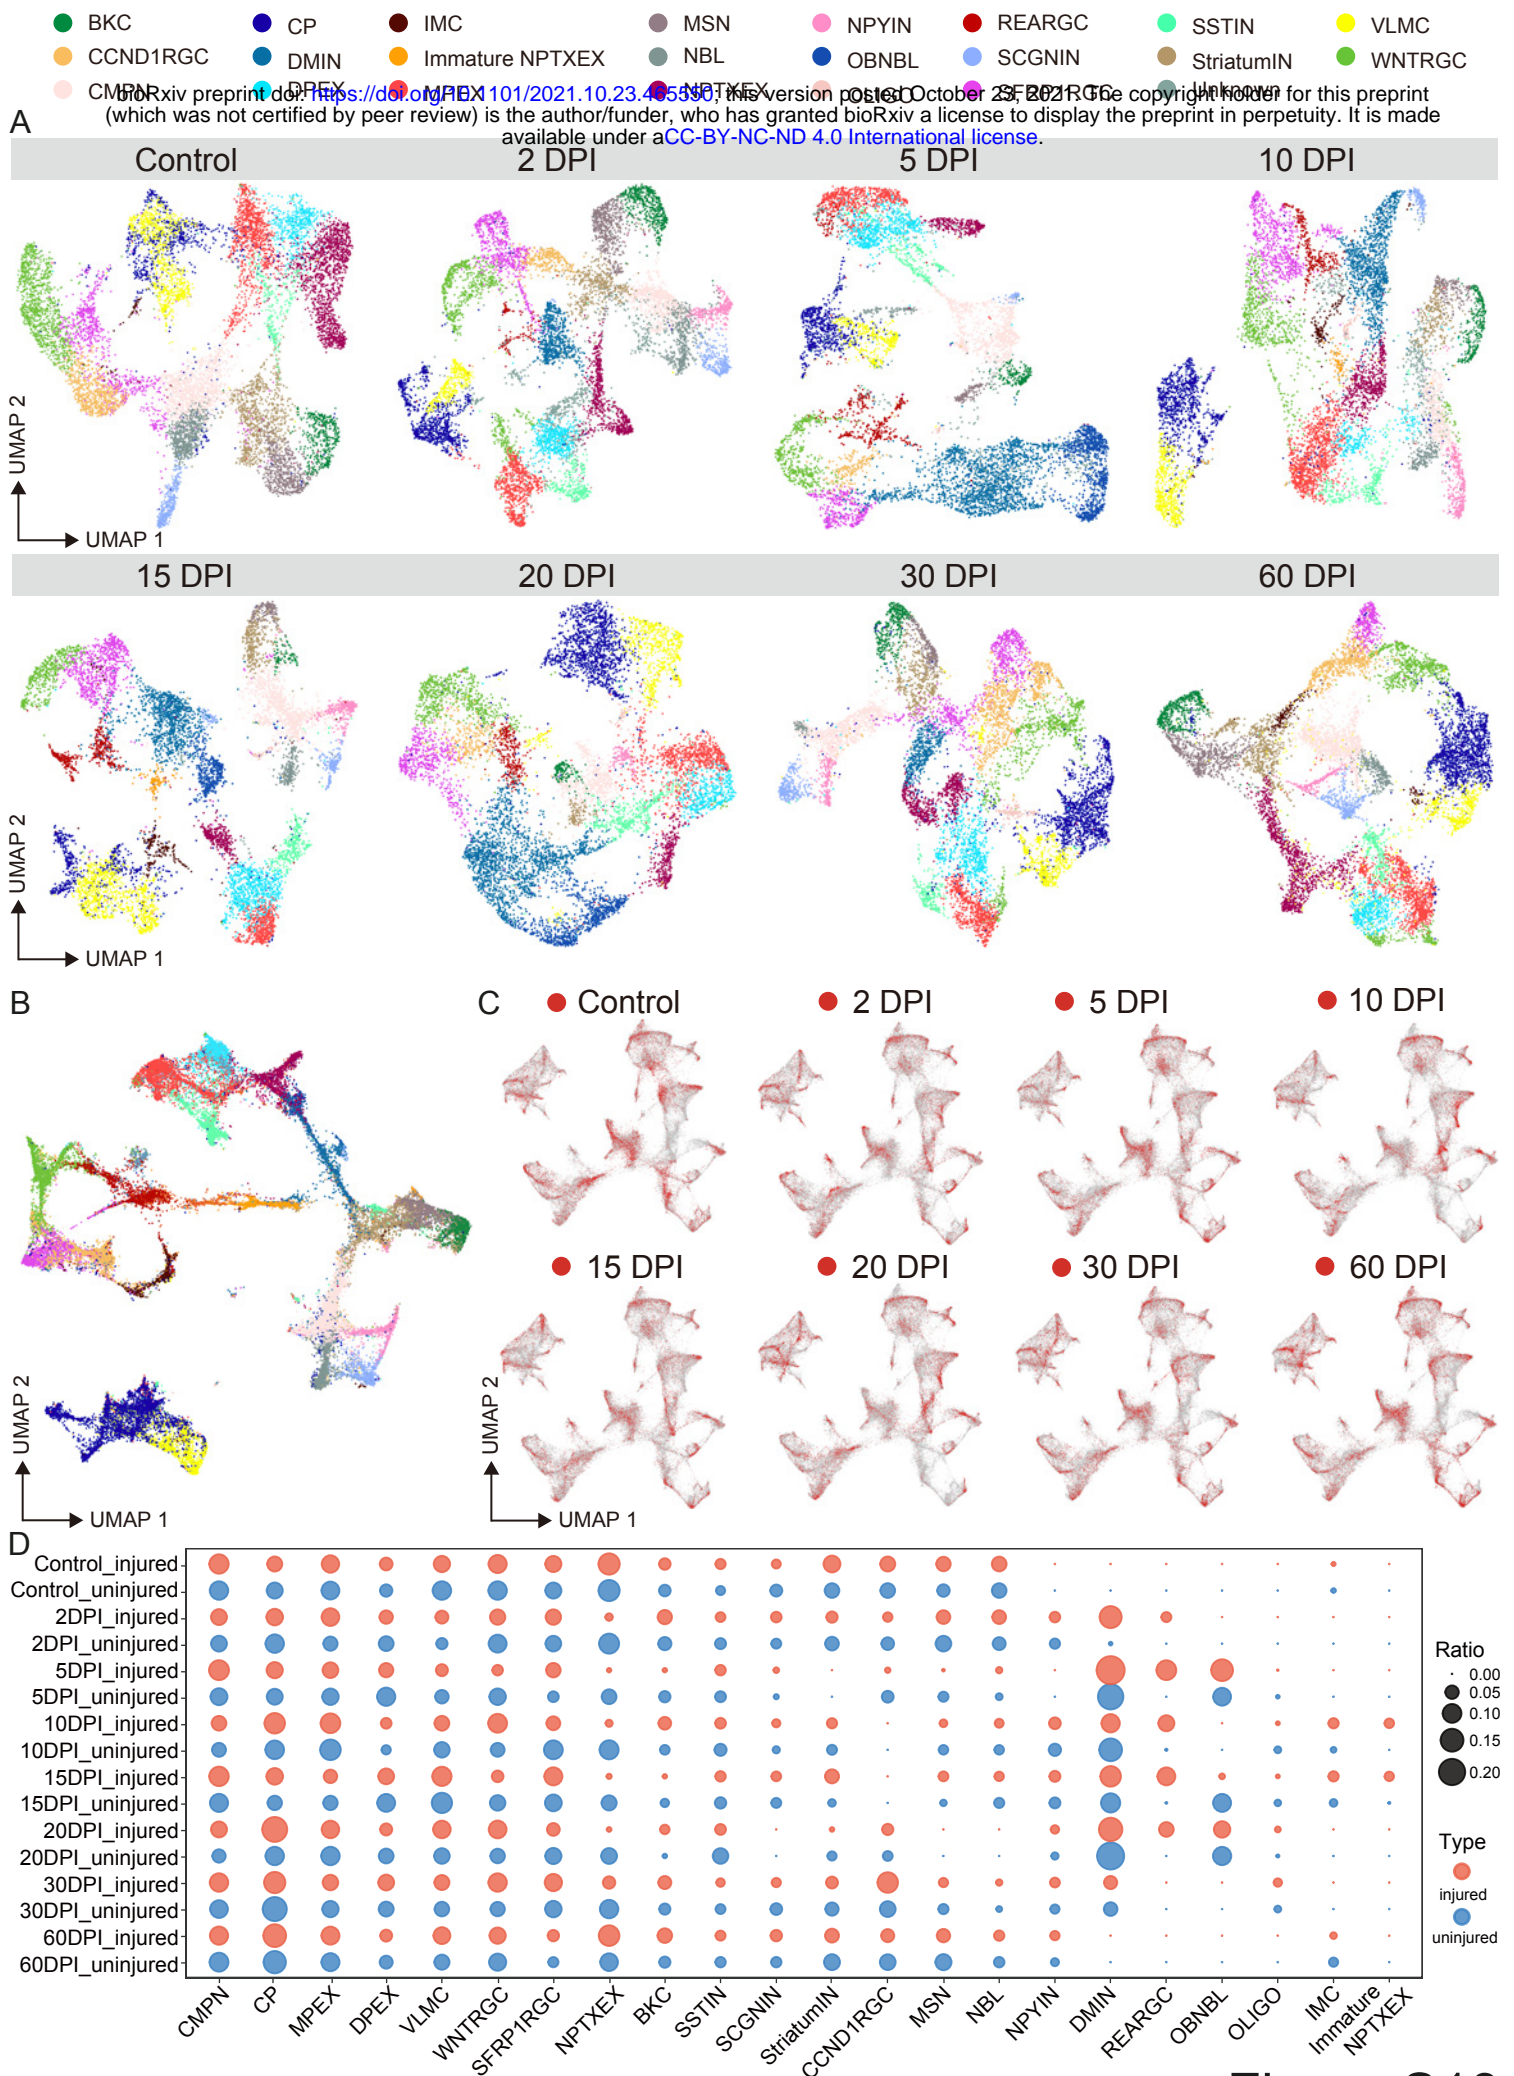

Figure S13



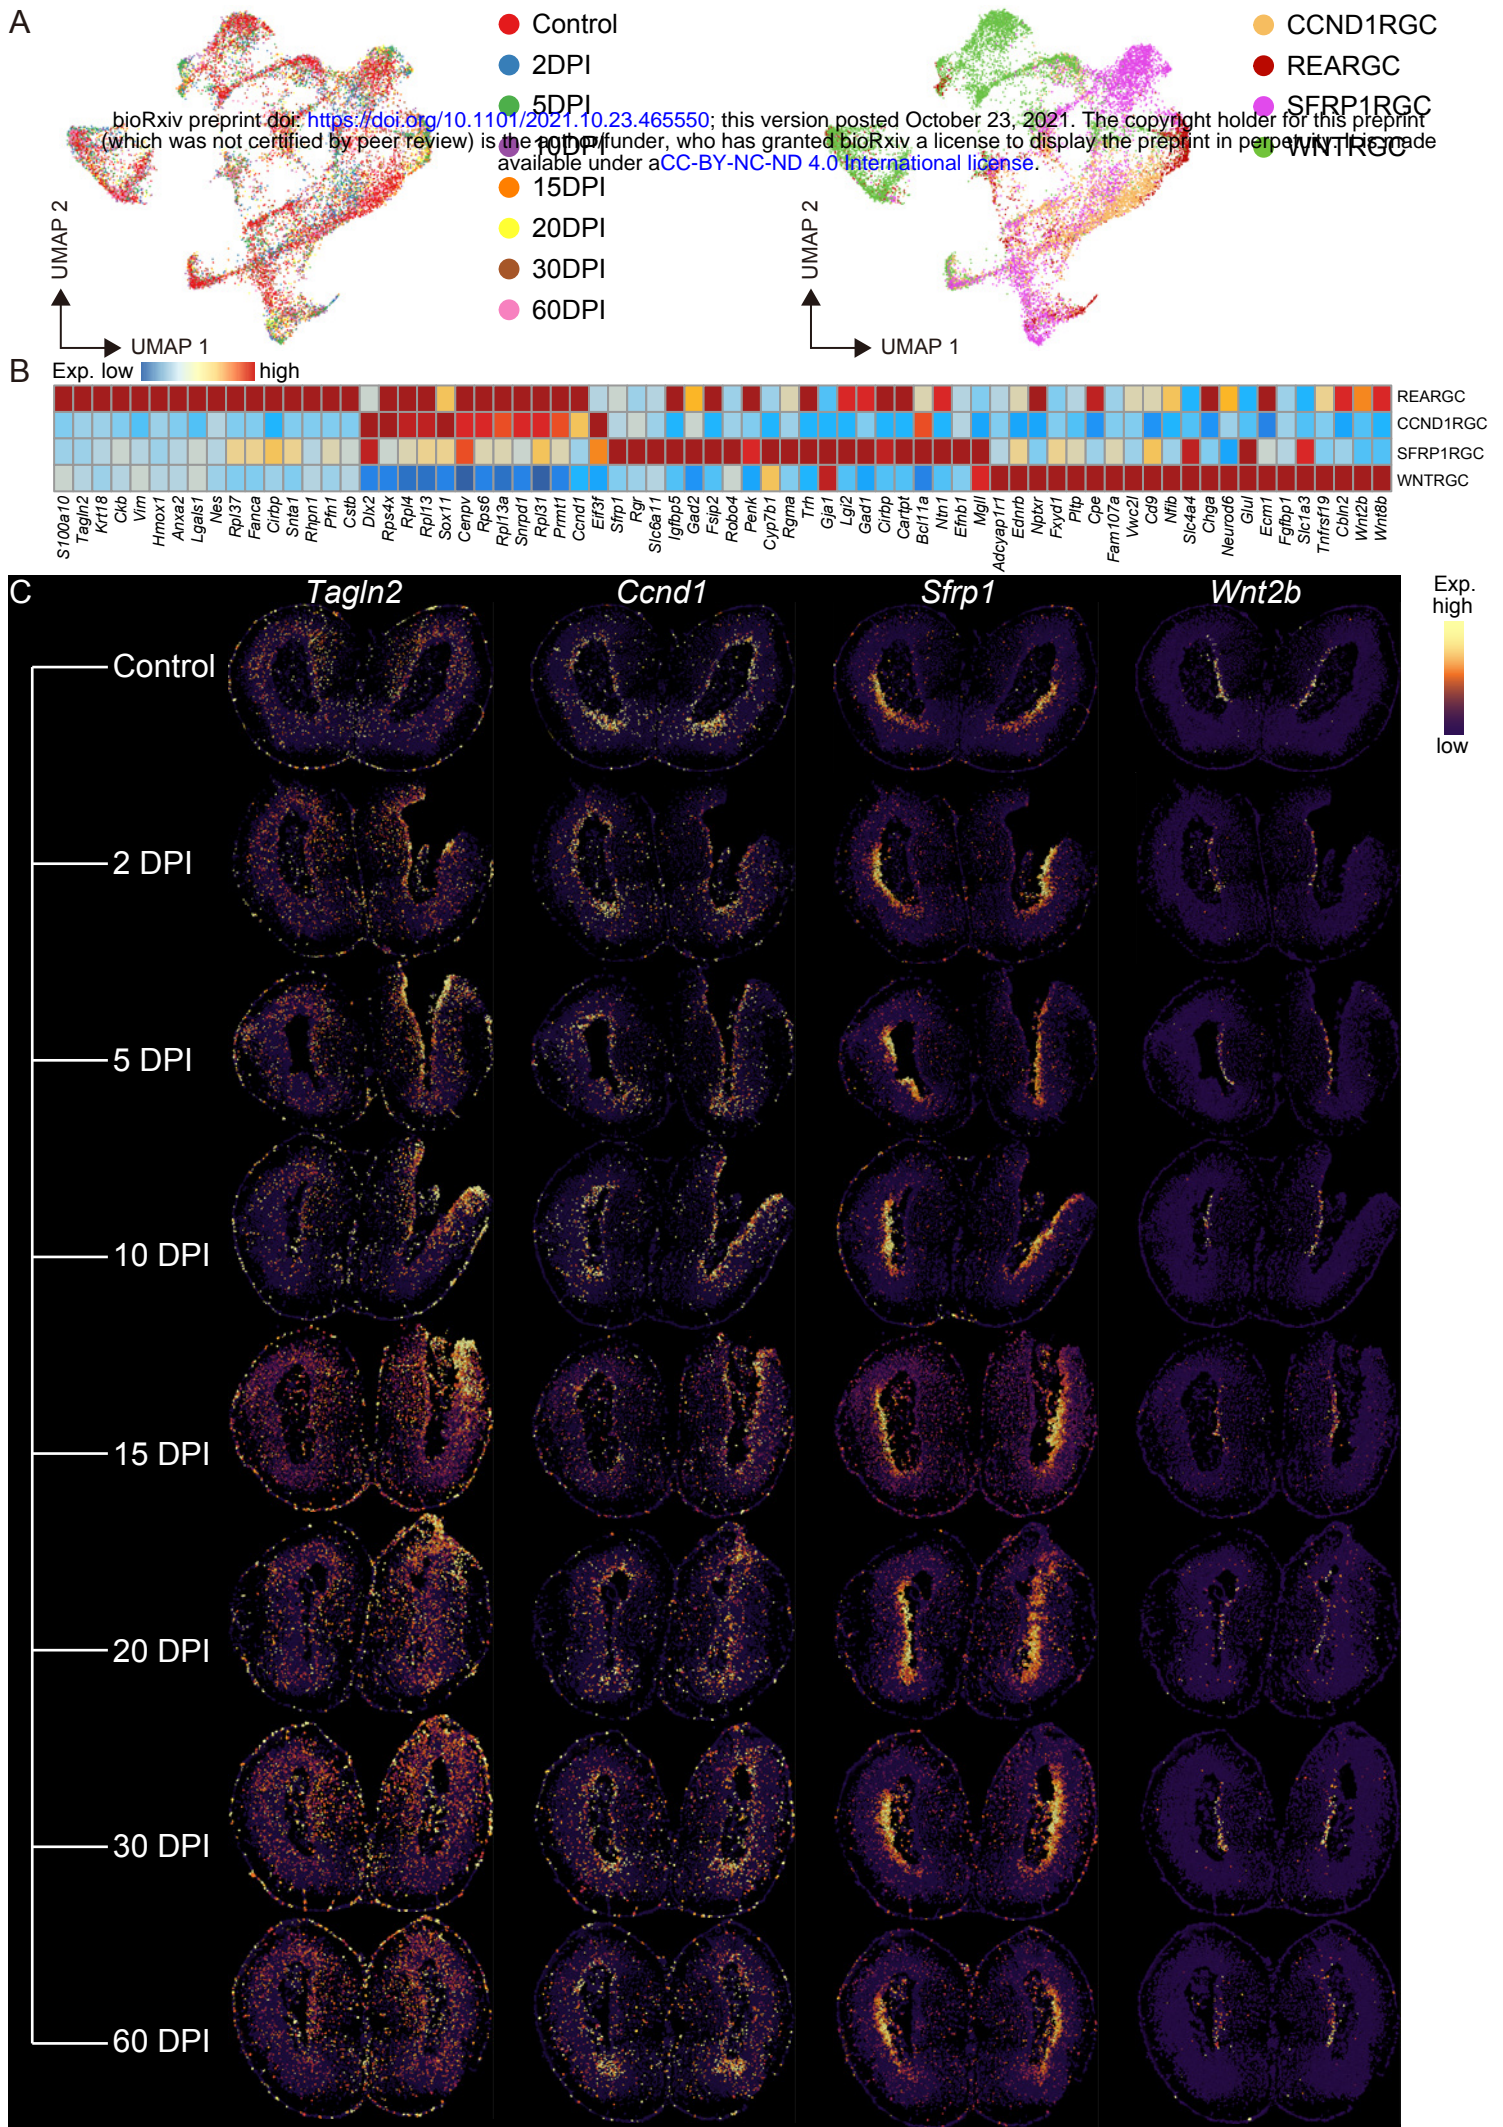

Figure S15

2 DPI

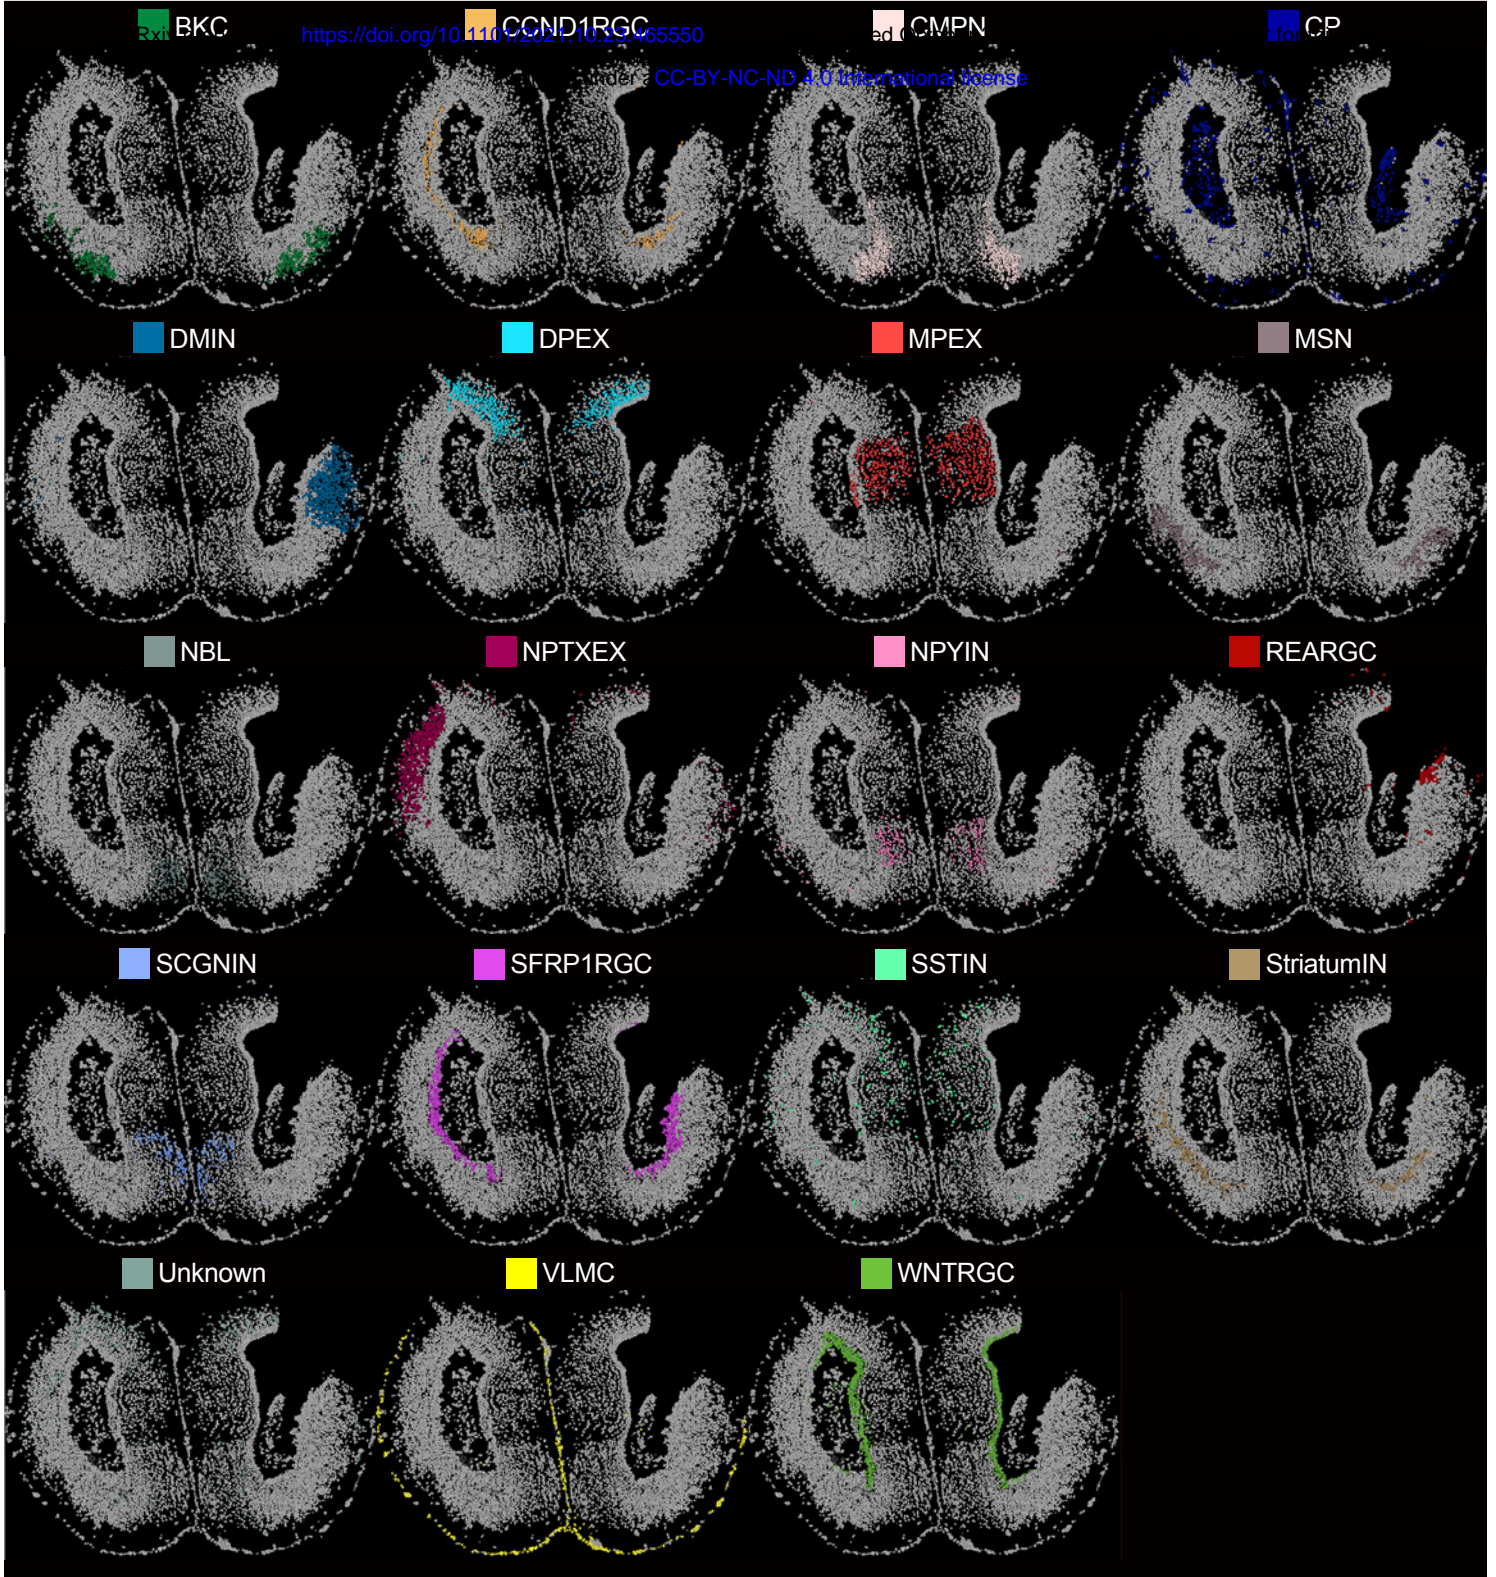

Figure S16

# 5 DPI

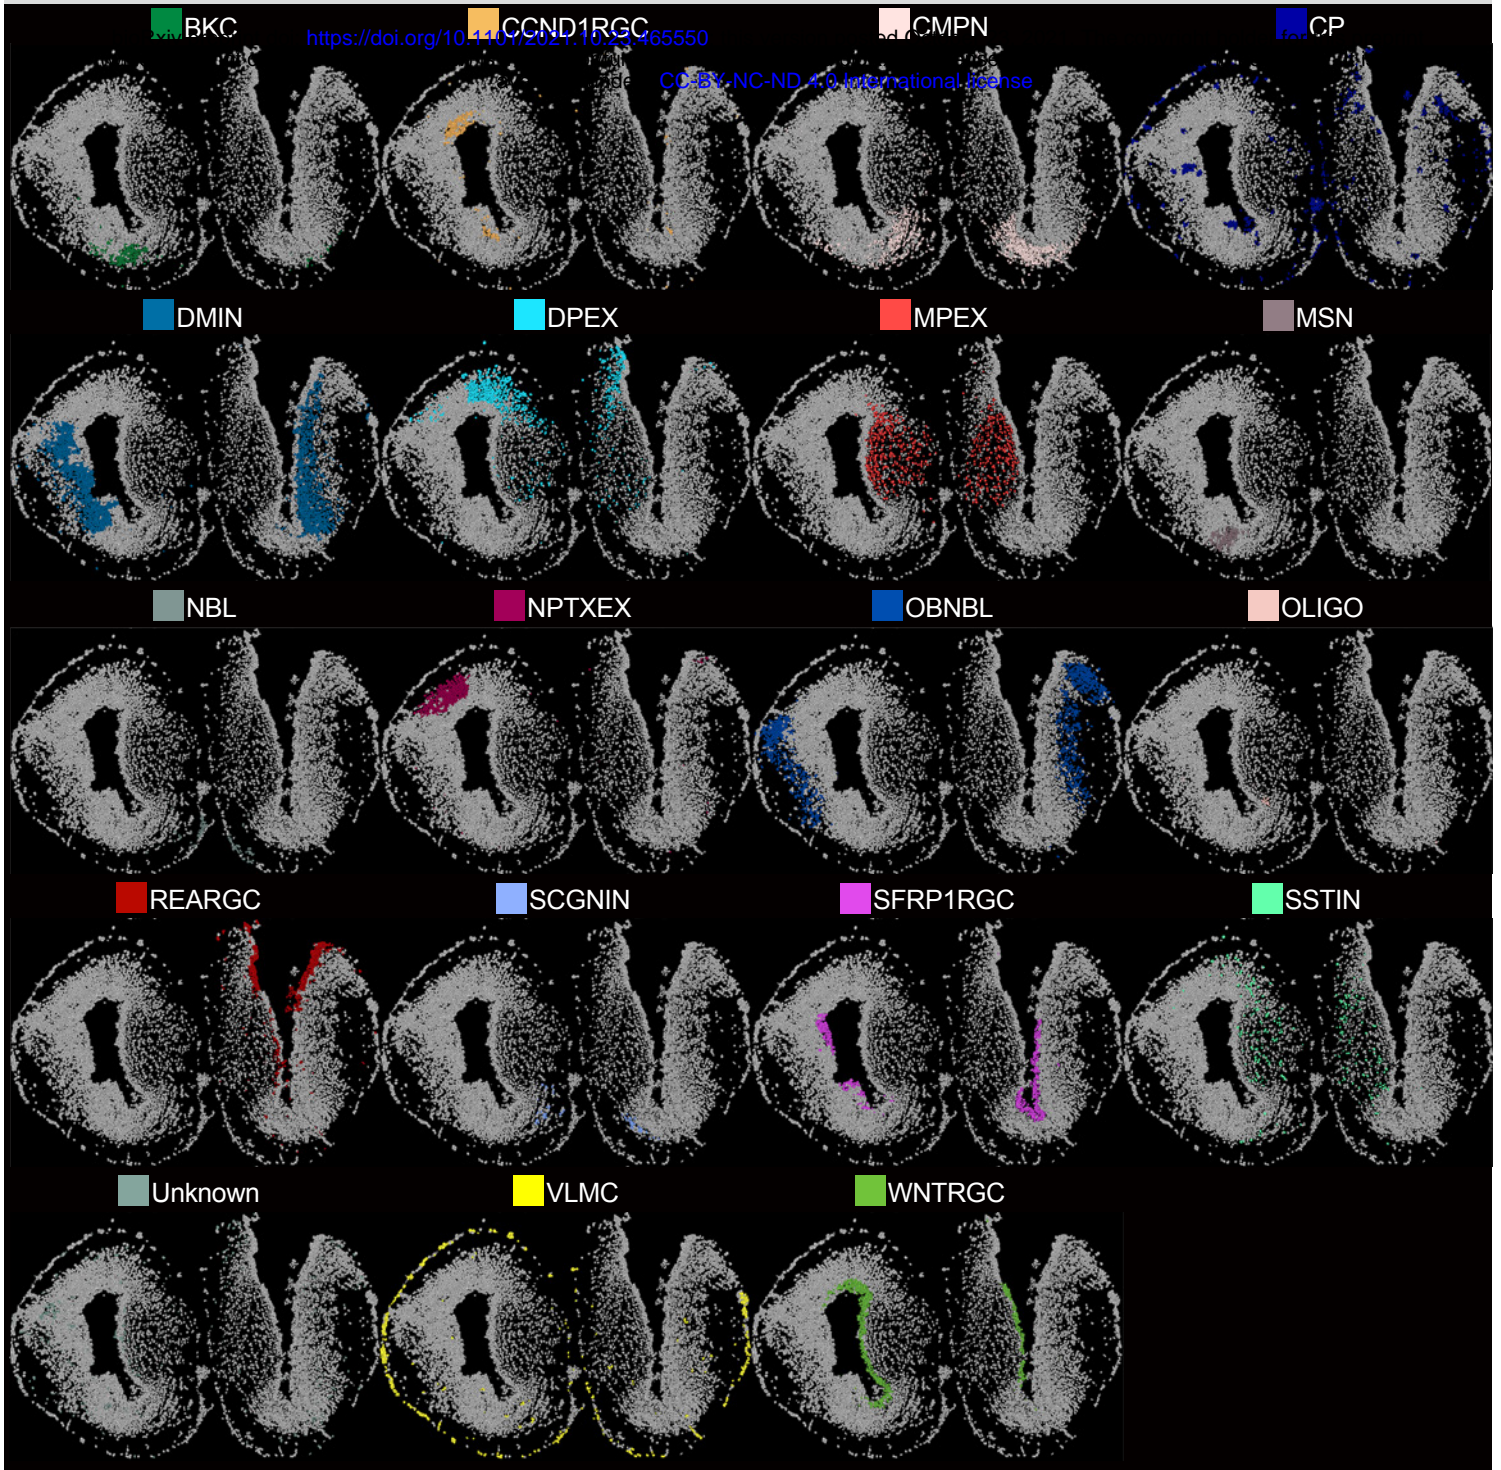

Figure S17

10 DPI

<https://doi.org/10.1101/2021.10.23.465550>

CC-BY-NC-ND 4.0 International license

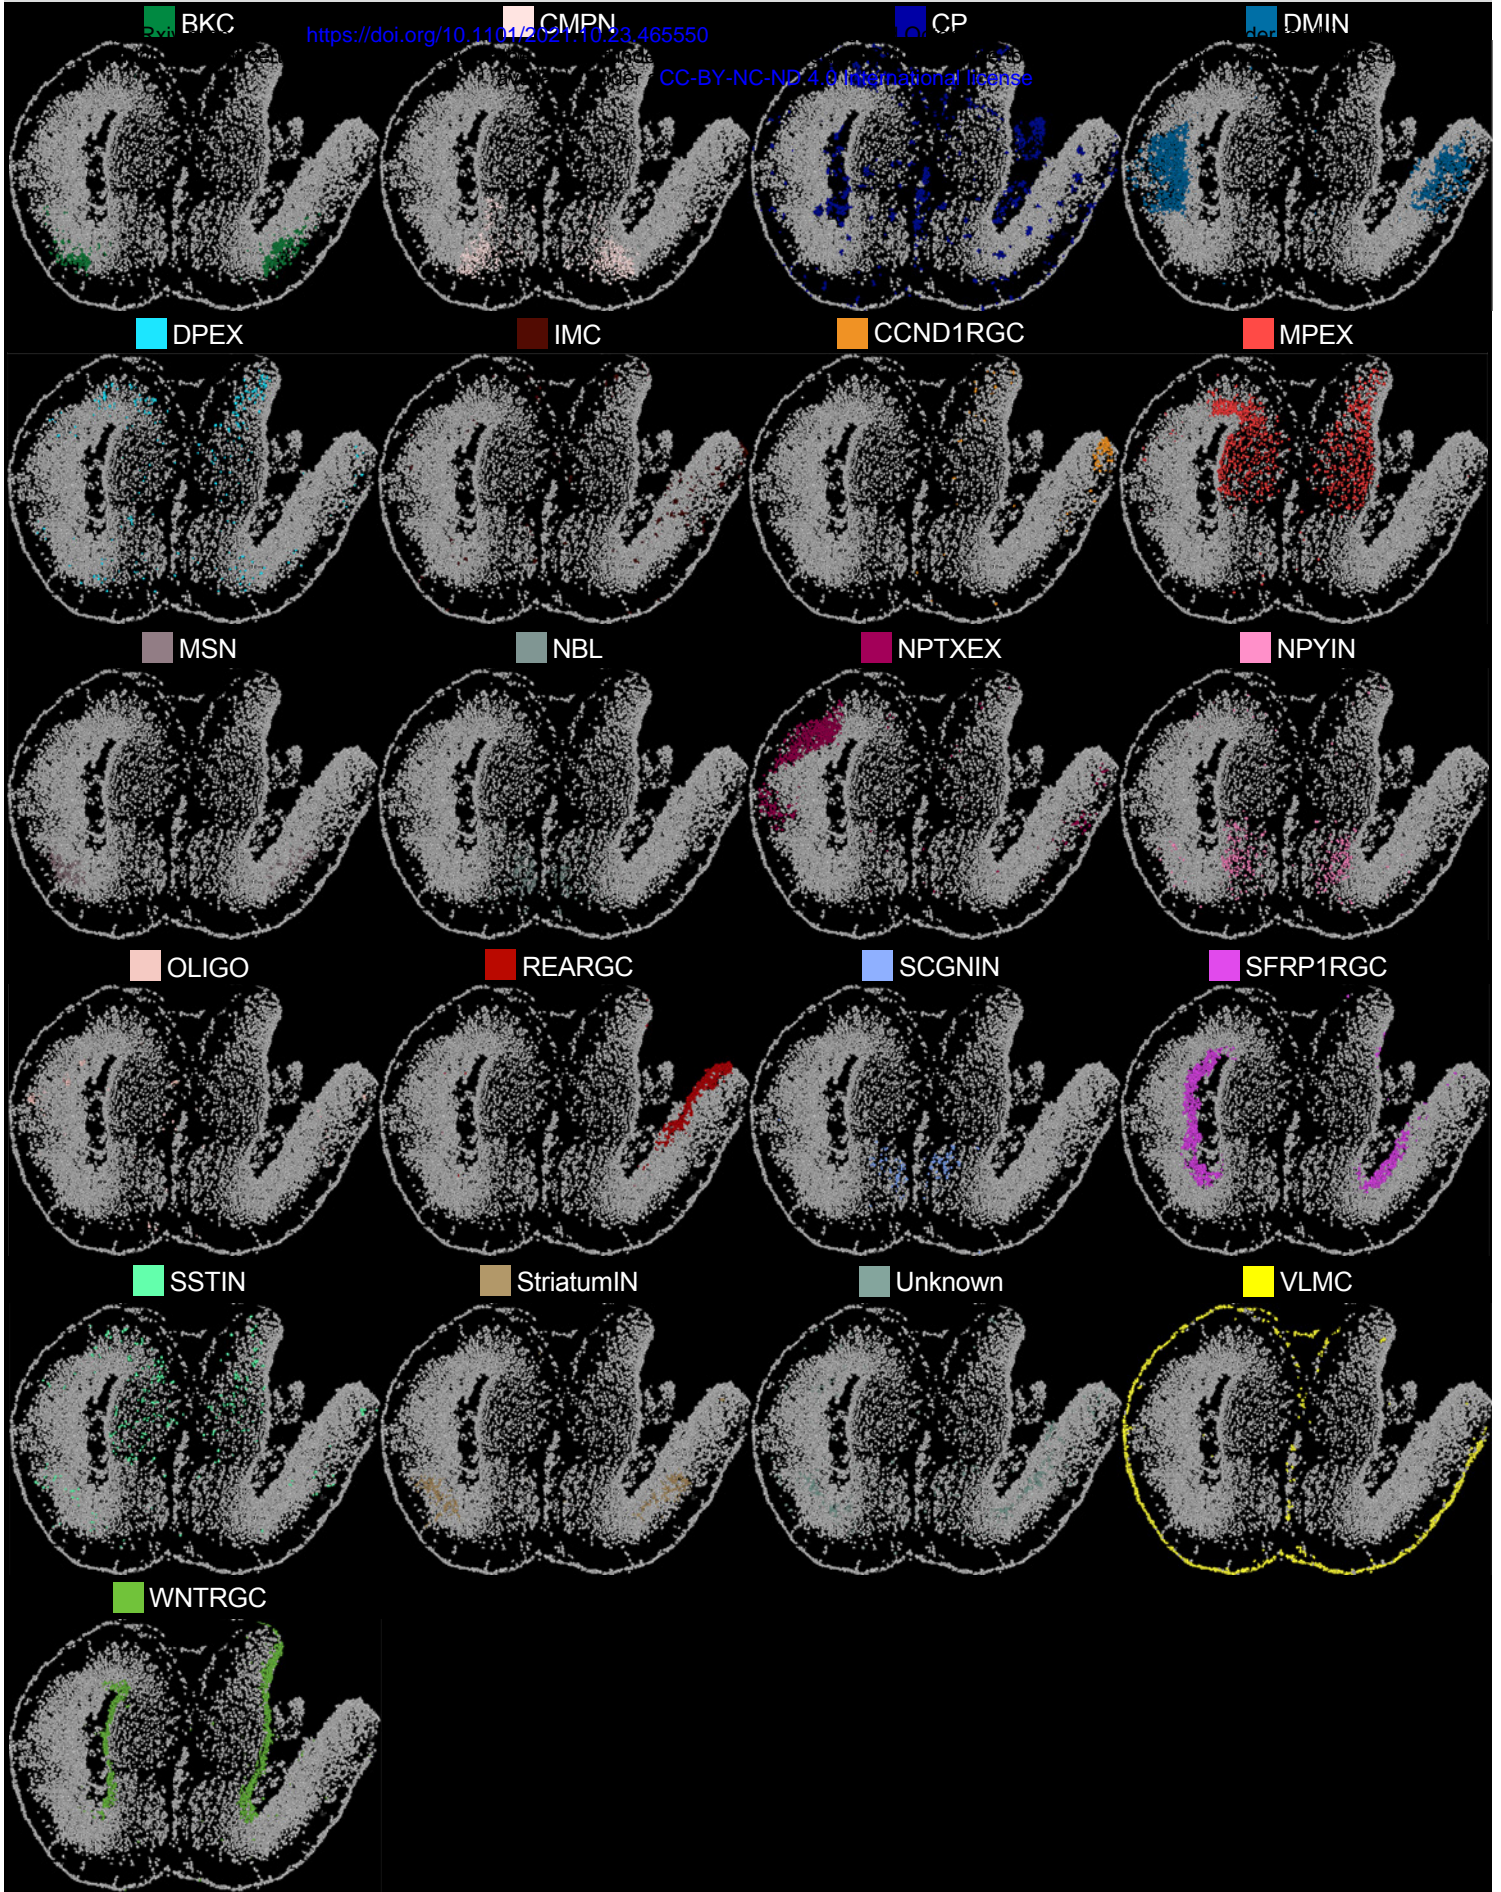

Figure S18

# 15 DPI

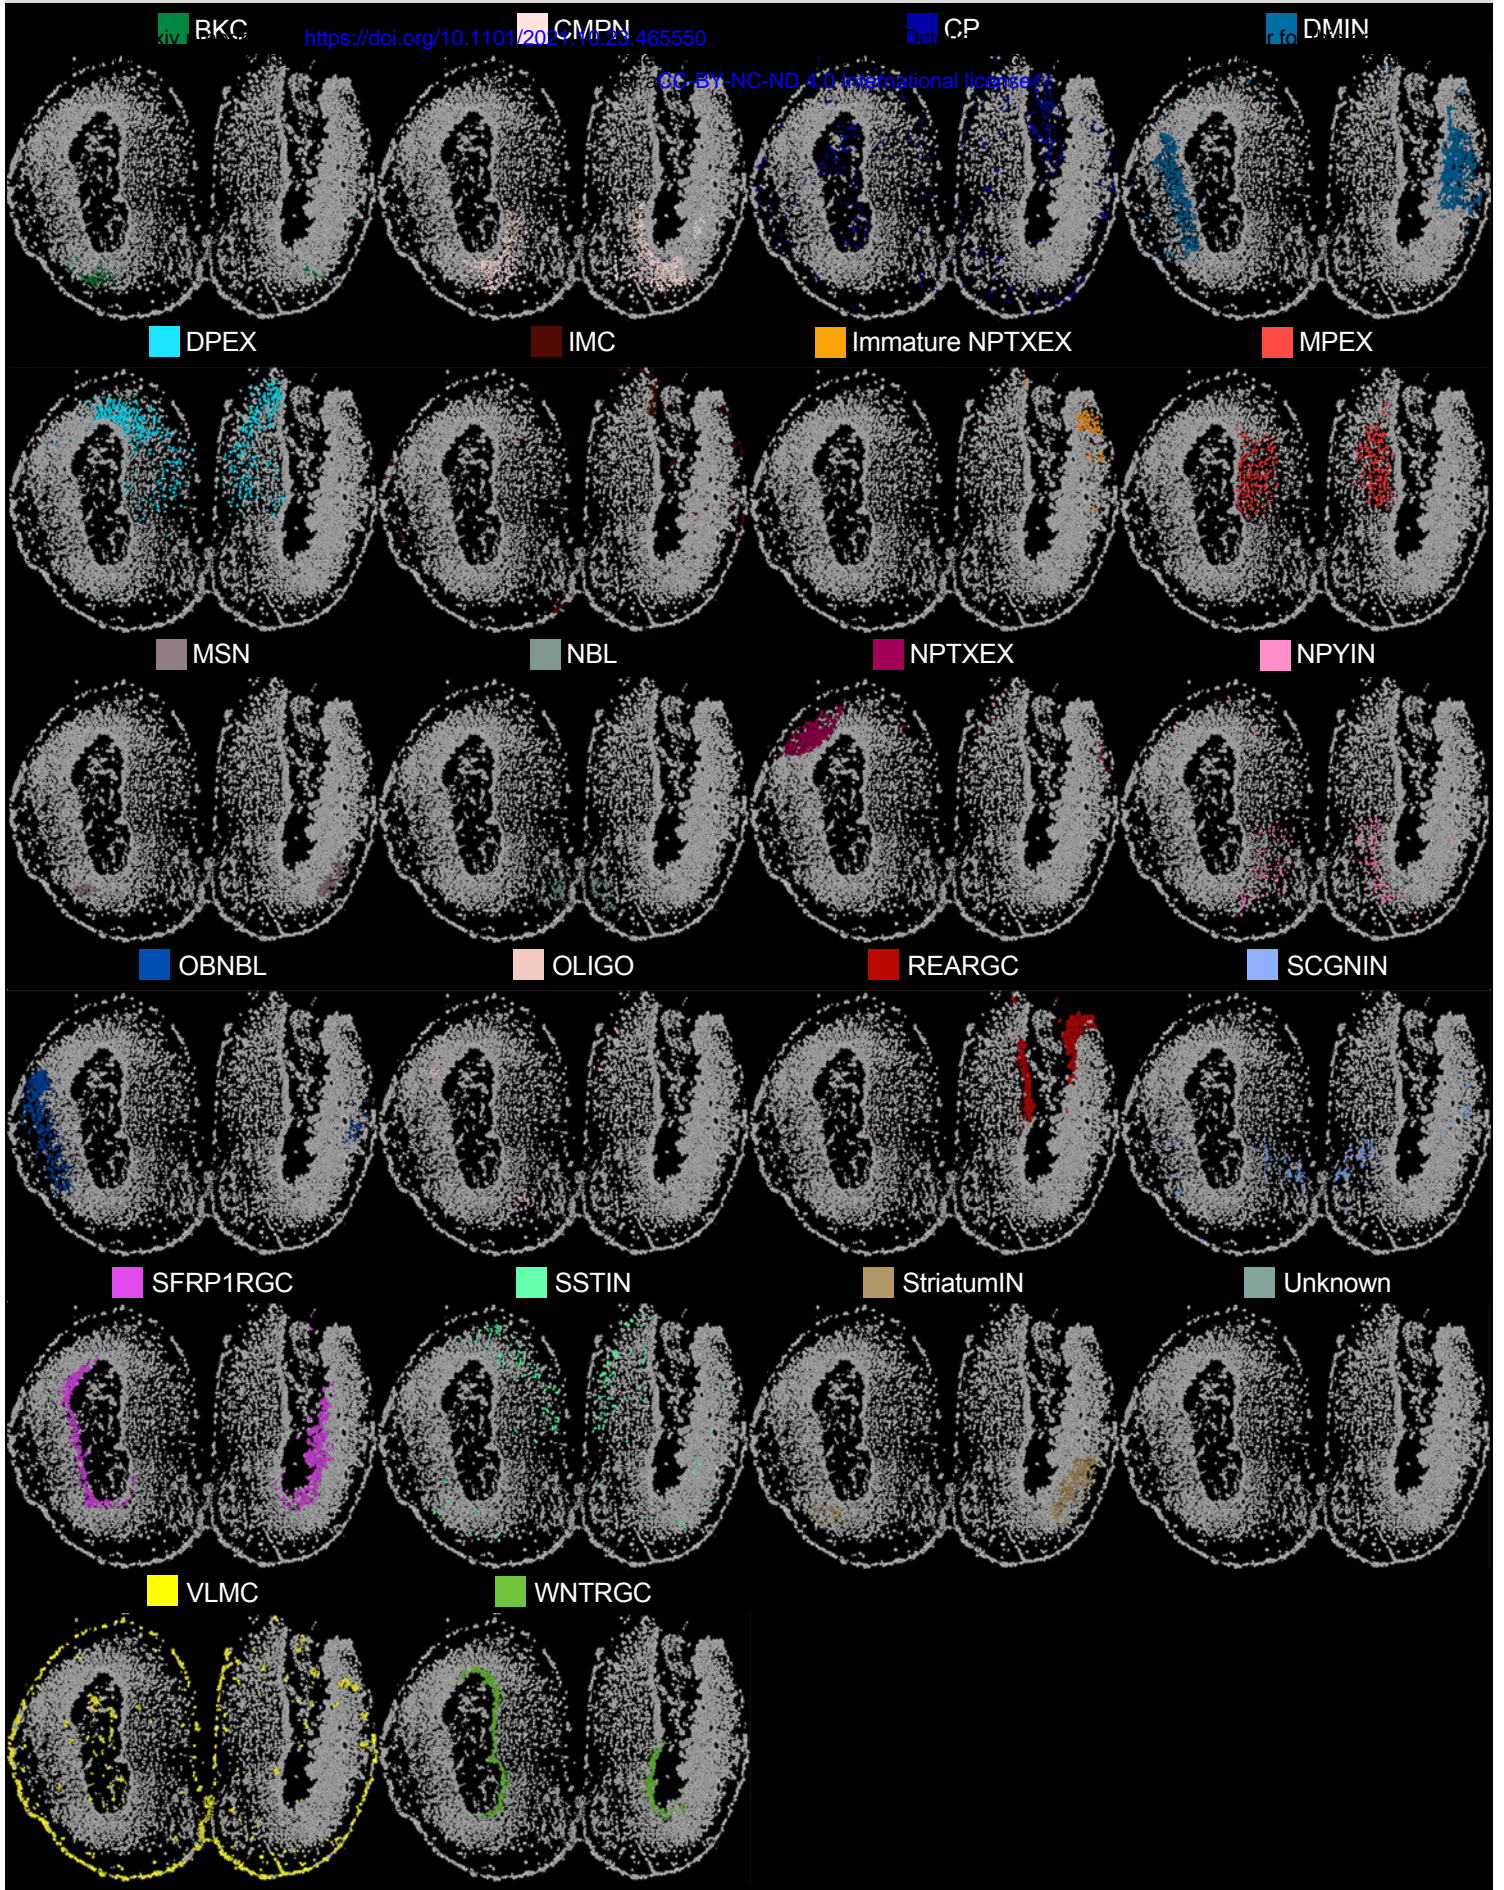

Figure S19

20 DPI

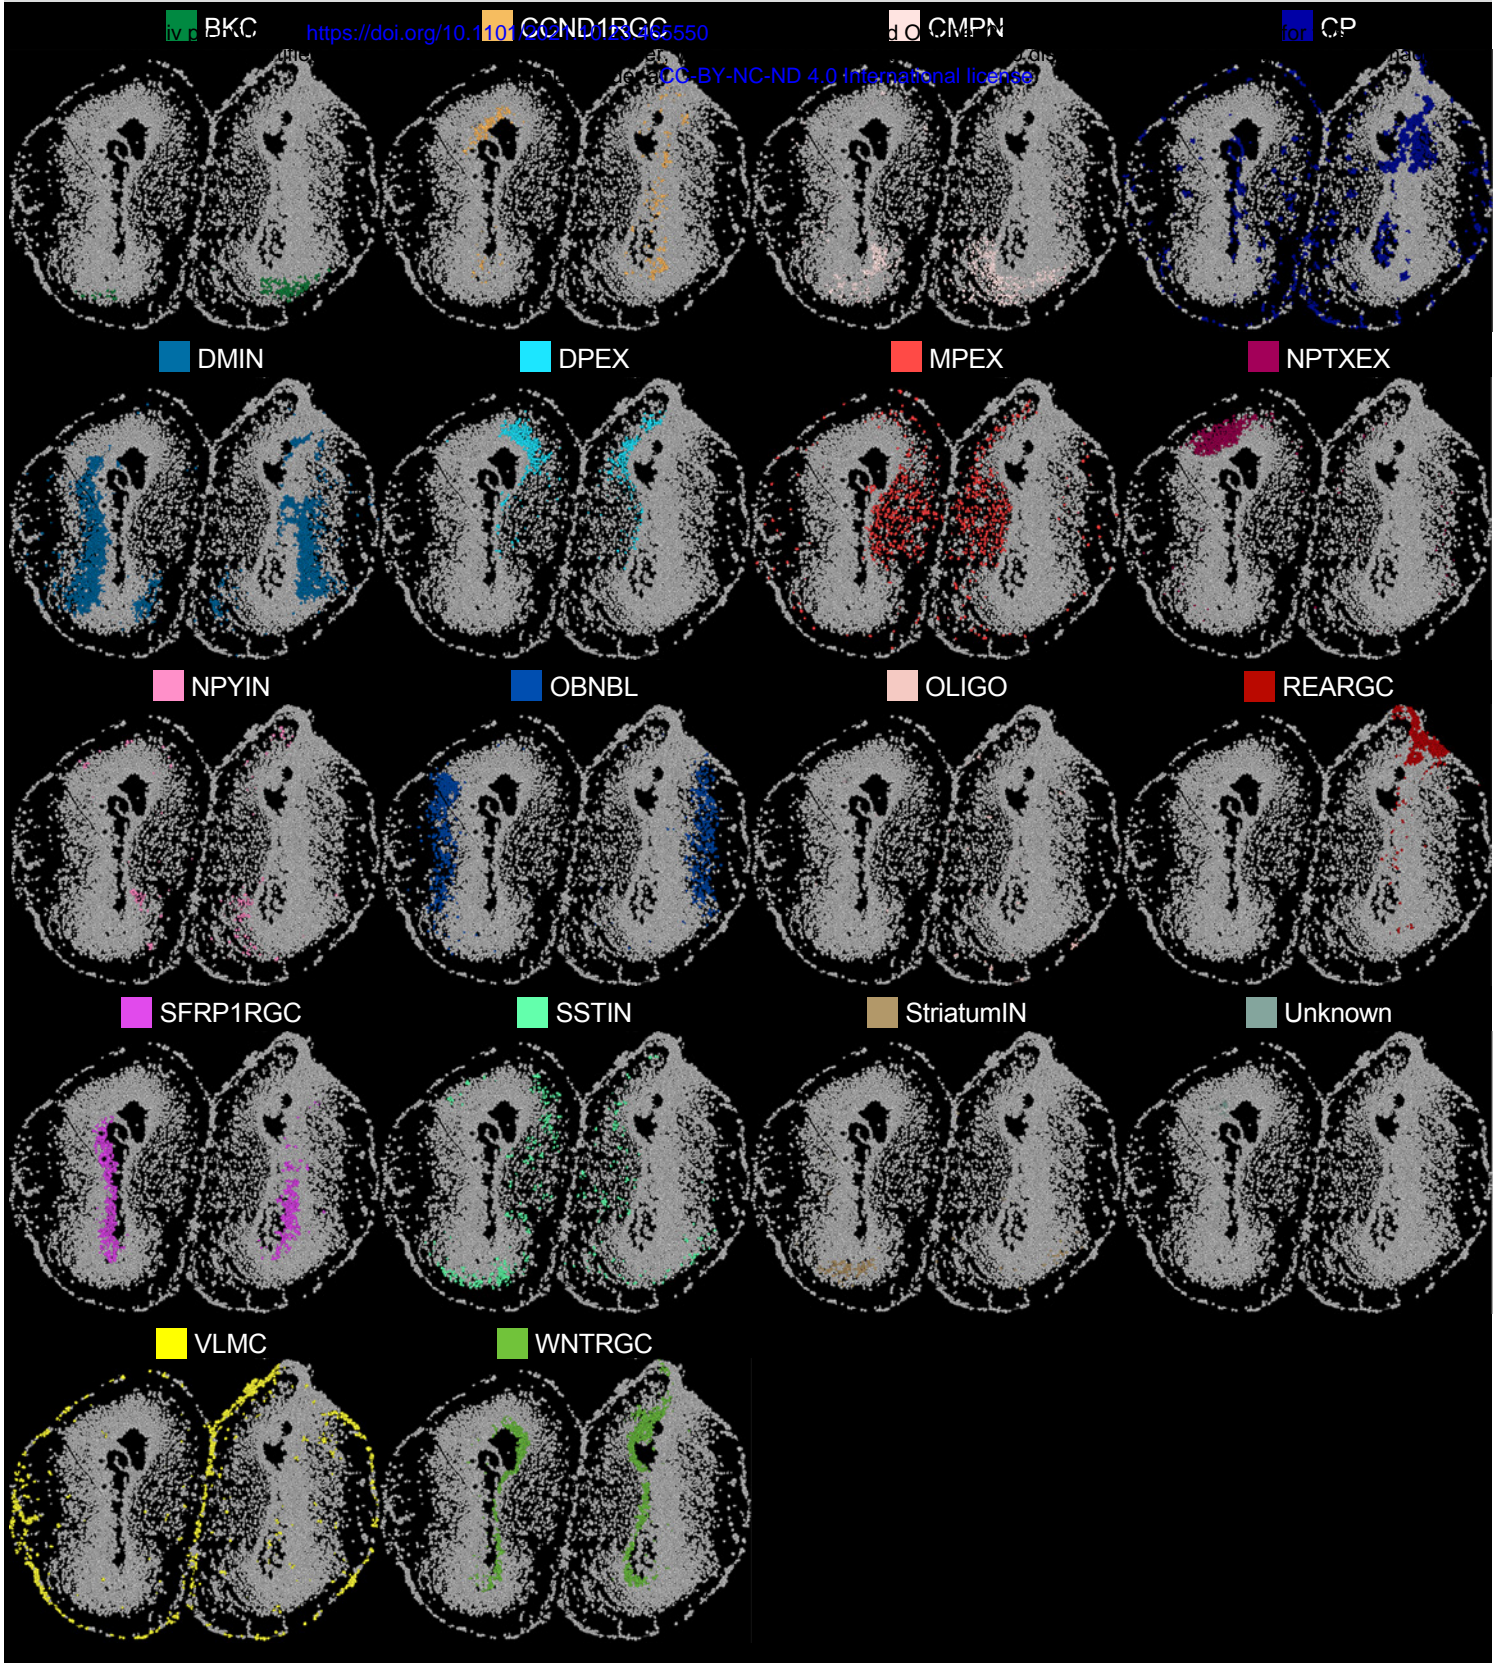

Figure 3-S20



30 DPI

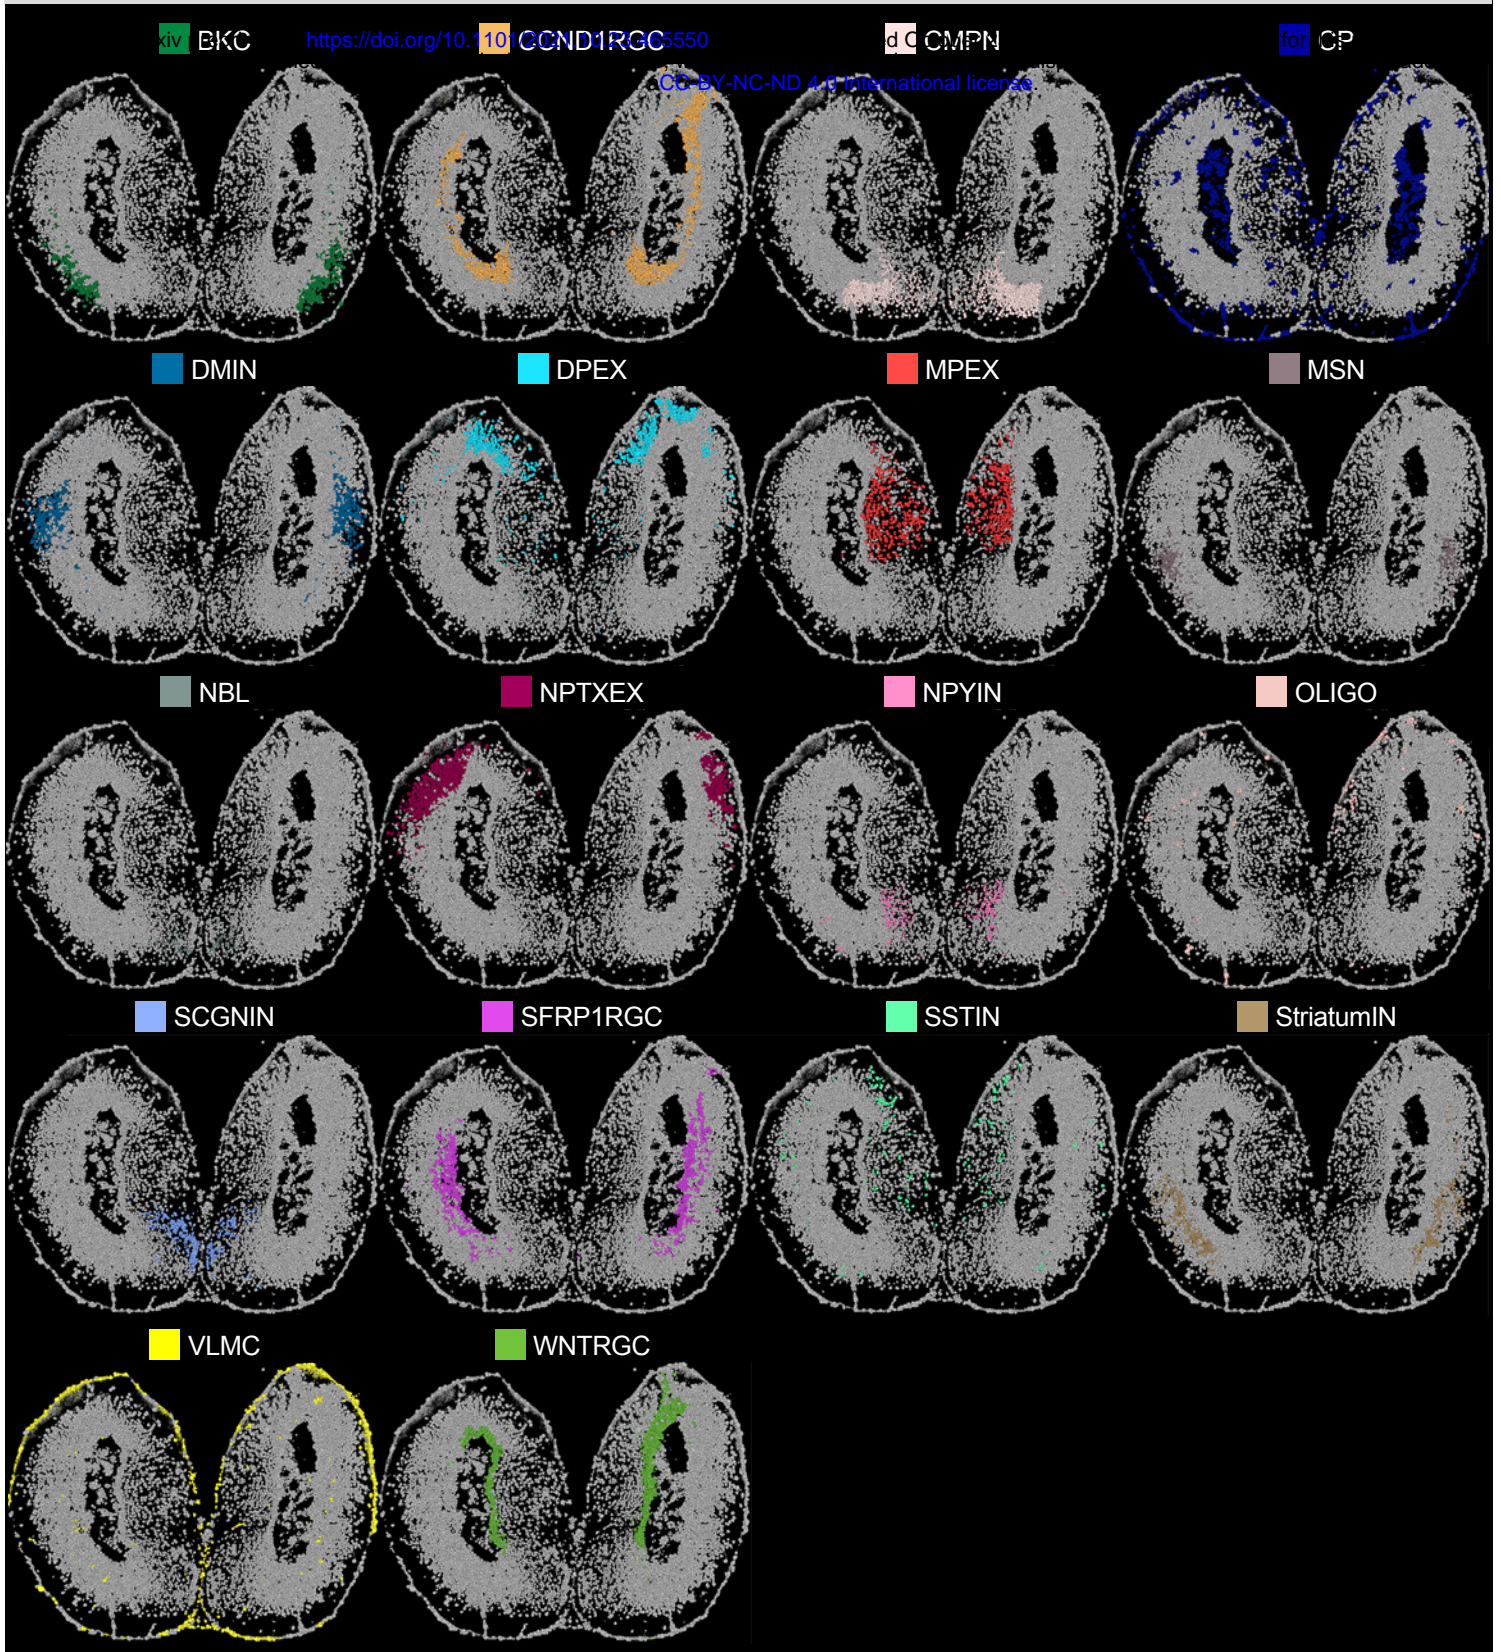

Figure S21

60 DPI

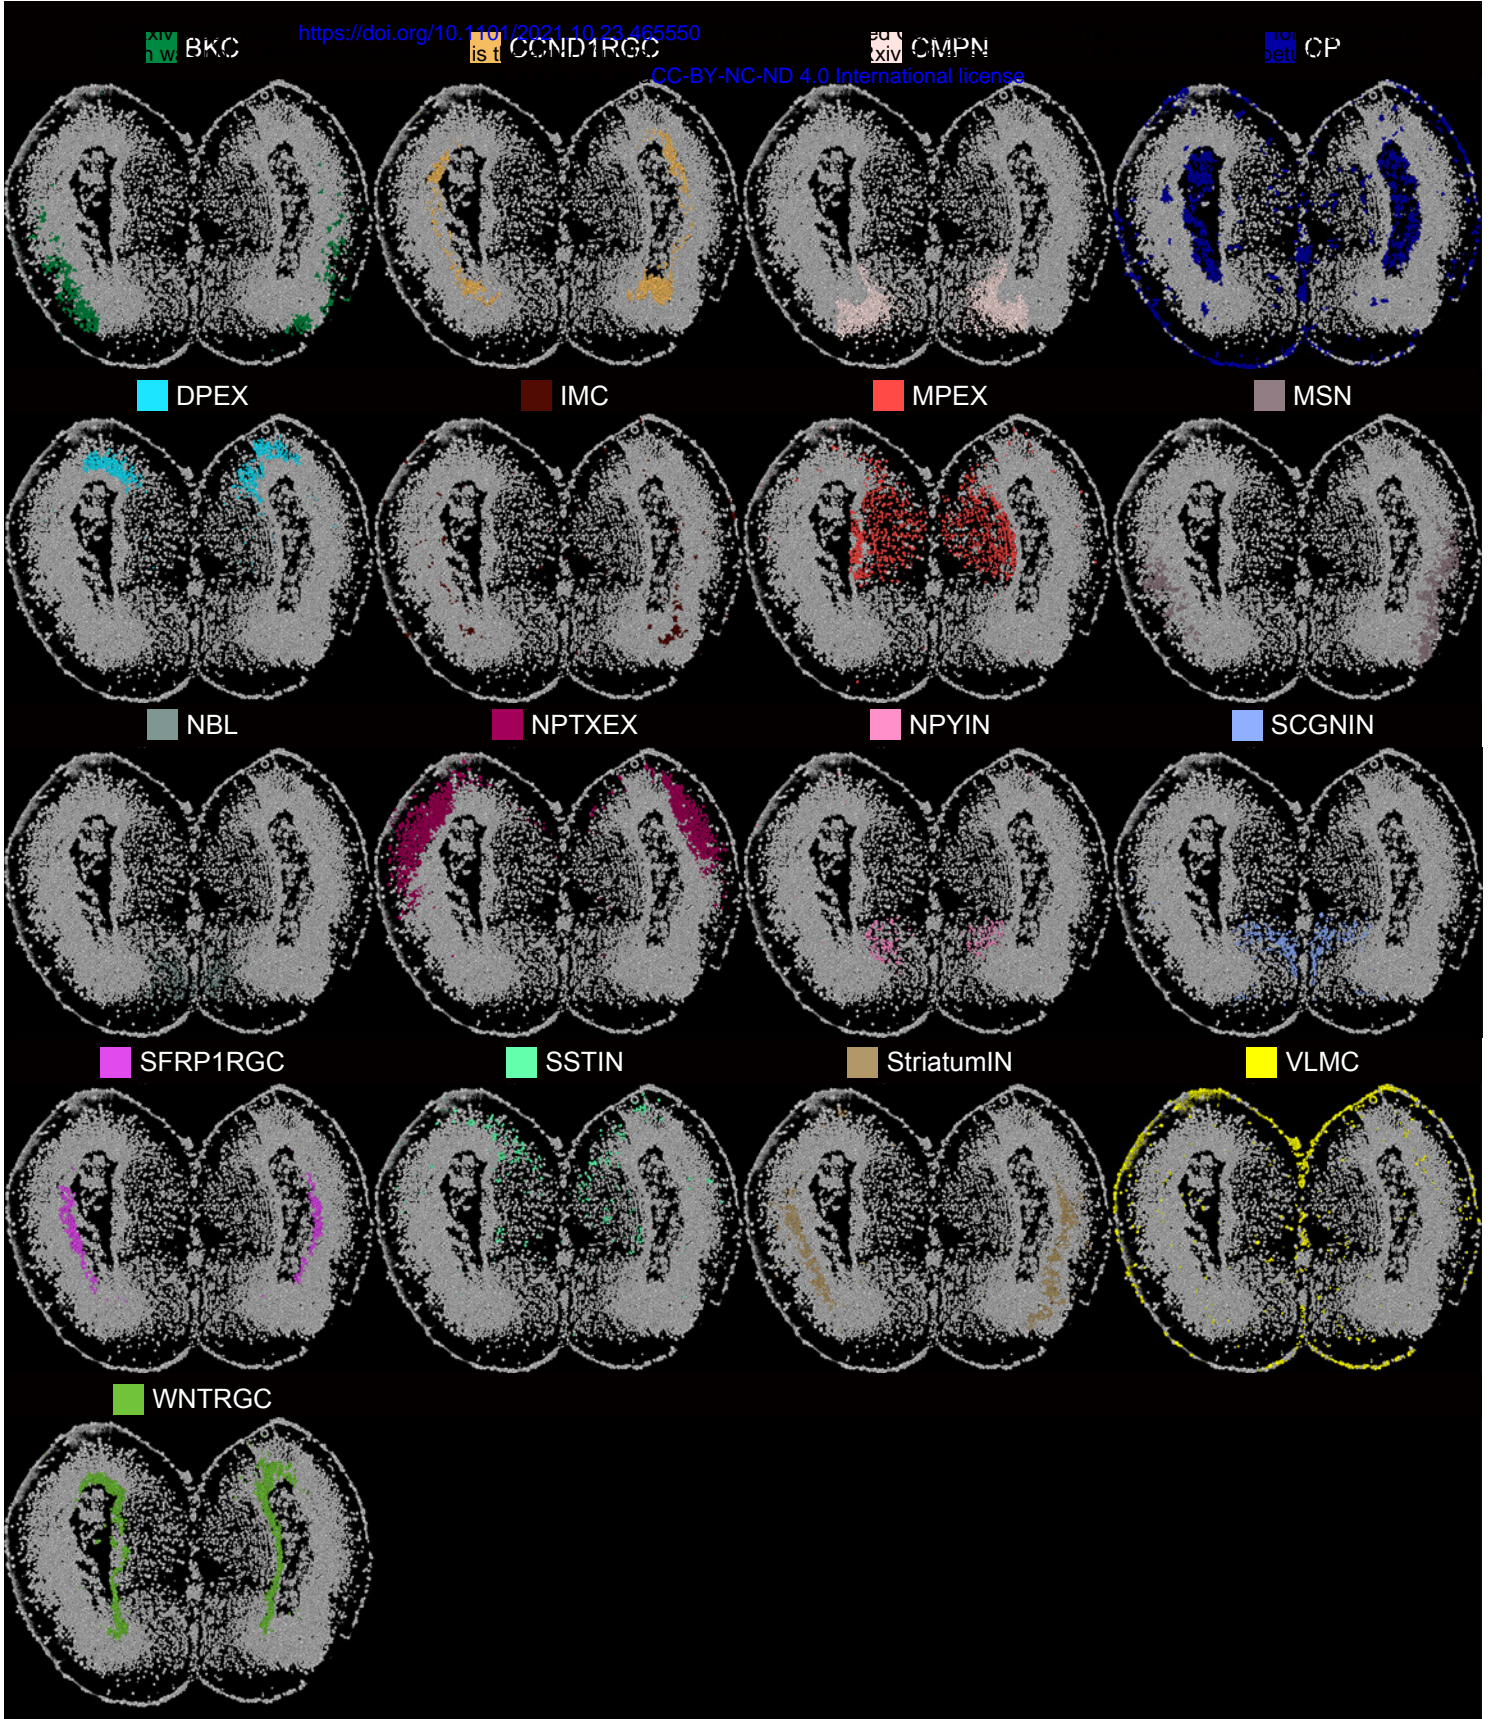

Figure S22

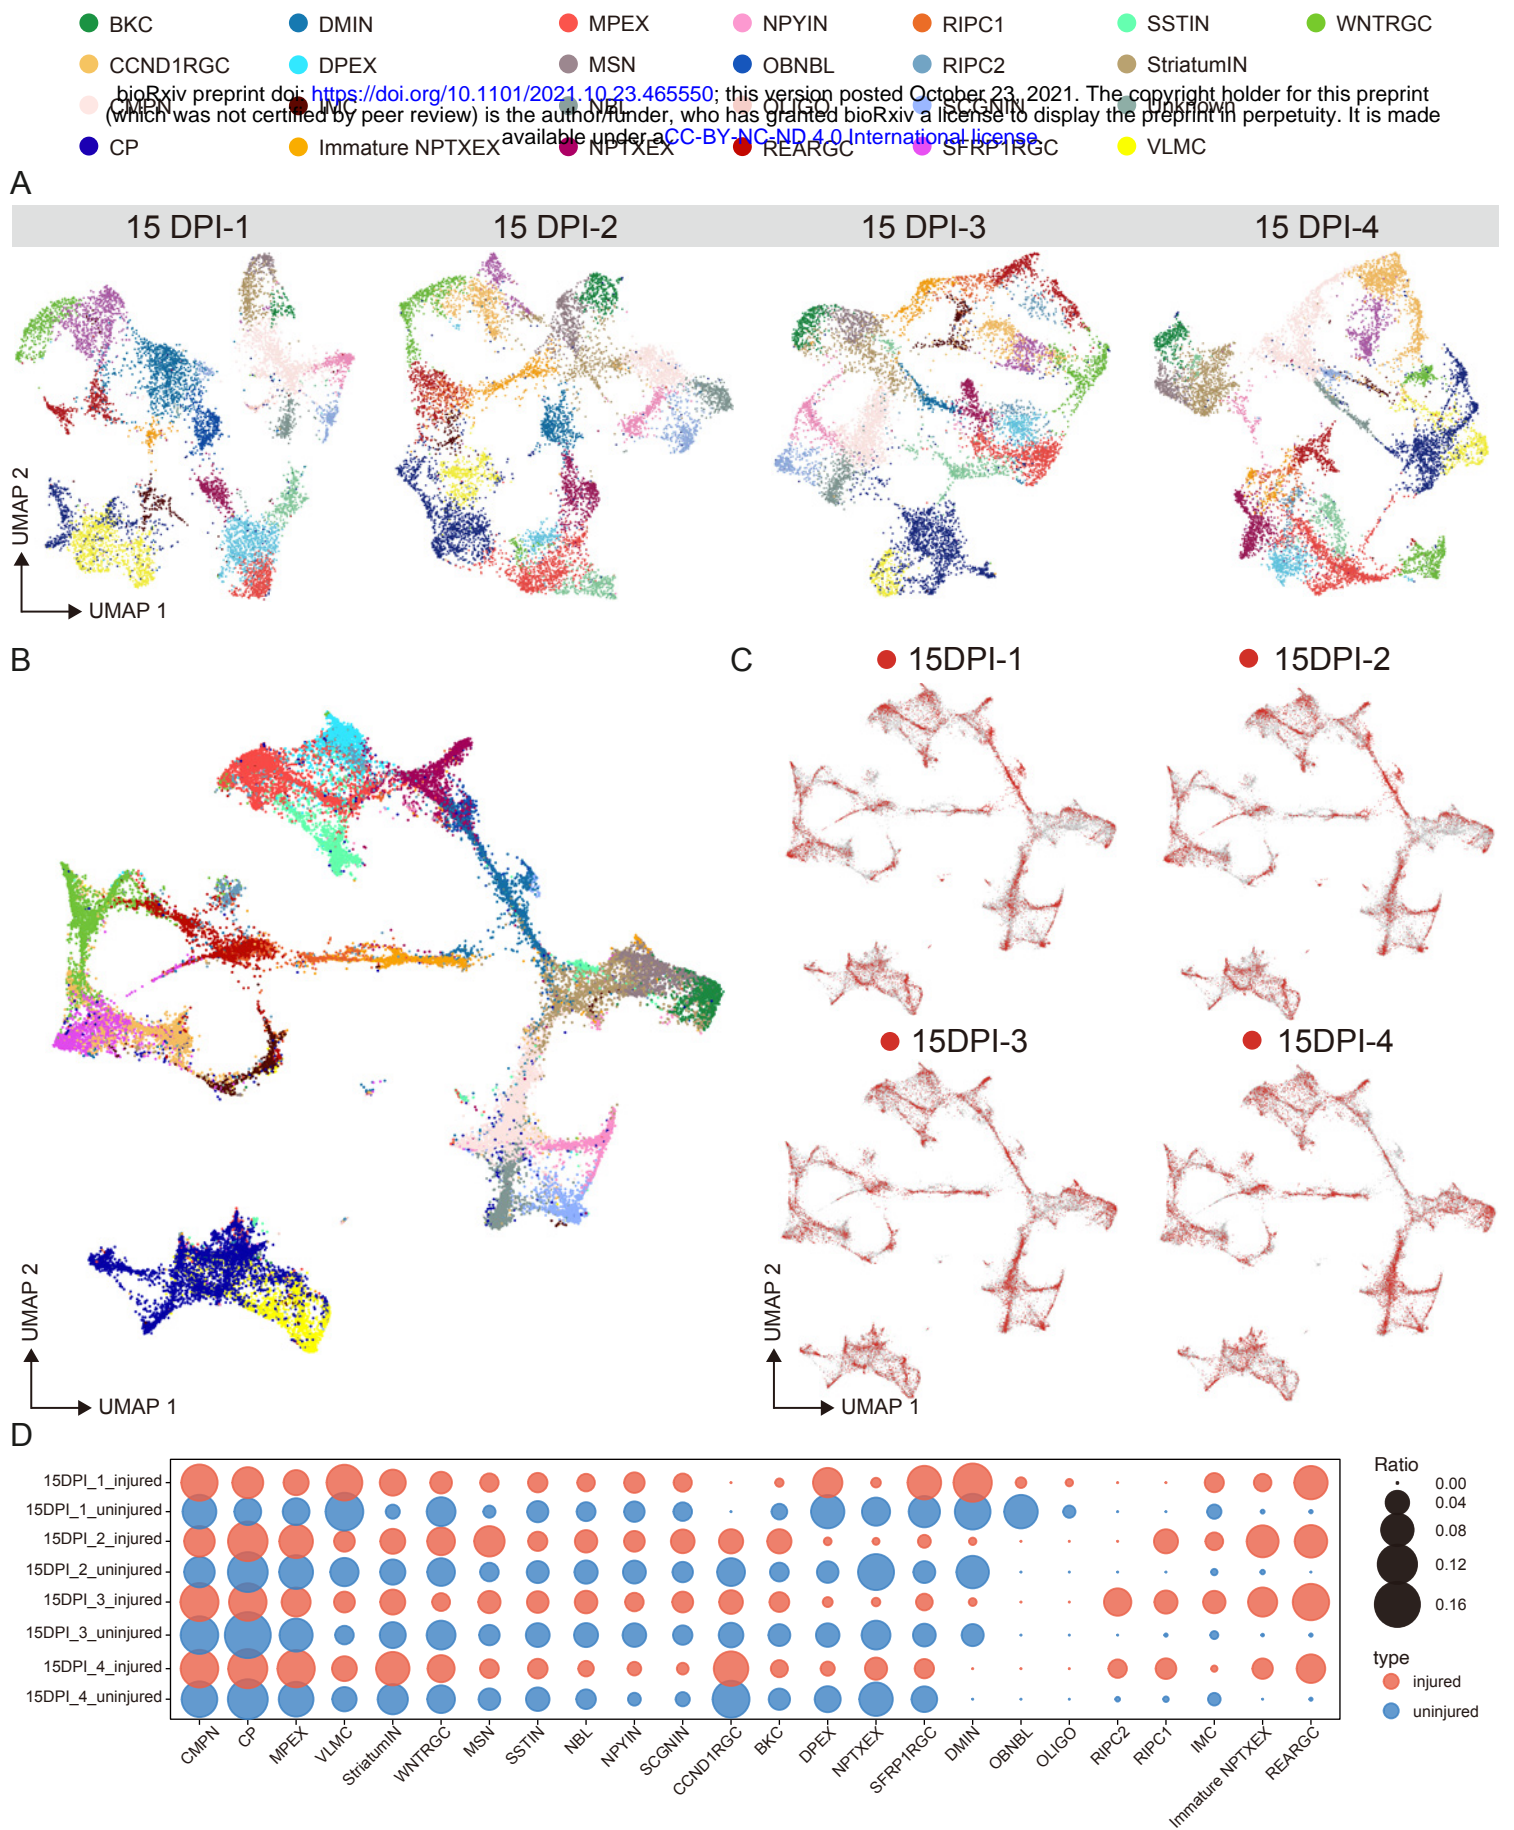

Figure S23

bioRxiv preprint doi: <https://doi.org/10.1101/2021.10.23.465550>; this version posted October 23, 2021. The copyright holder for this preprint (which was not certified by peer review) is the author/funder, who has granted bioRxiv a license to display the preprint in perpetuity. It is made available under aCC-BY-NC-ND 4.0 International license.

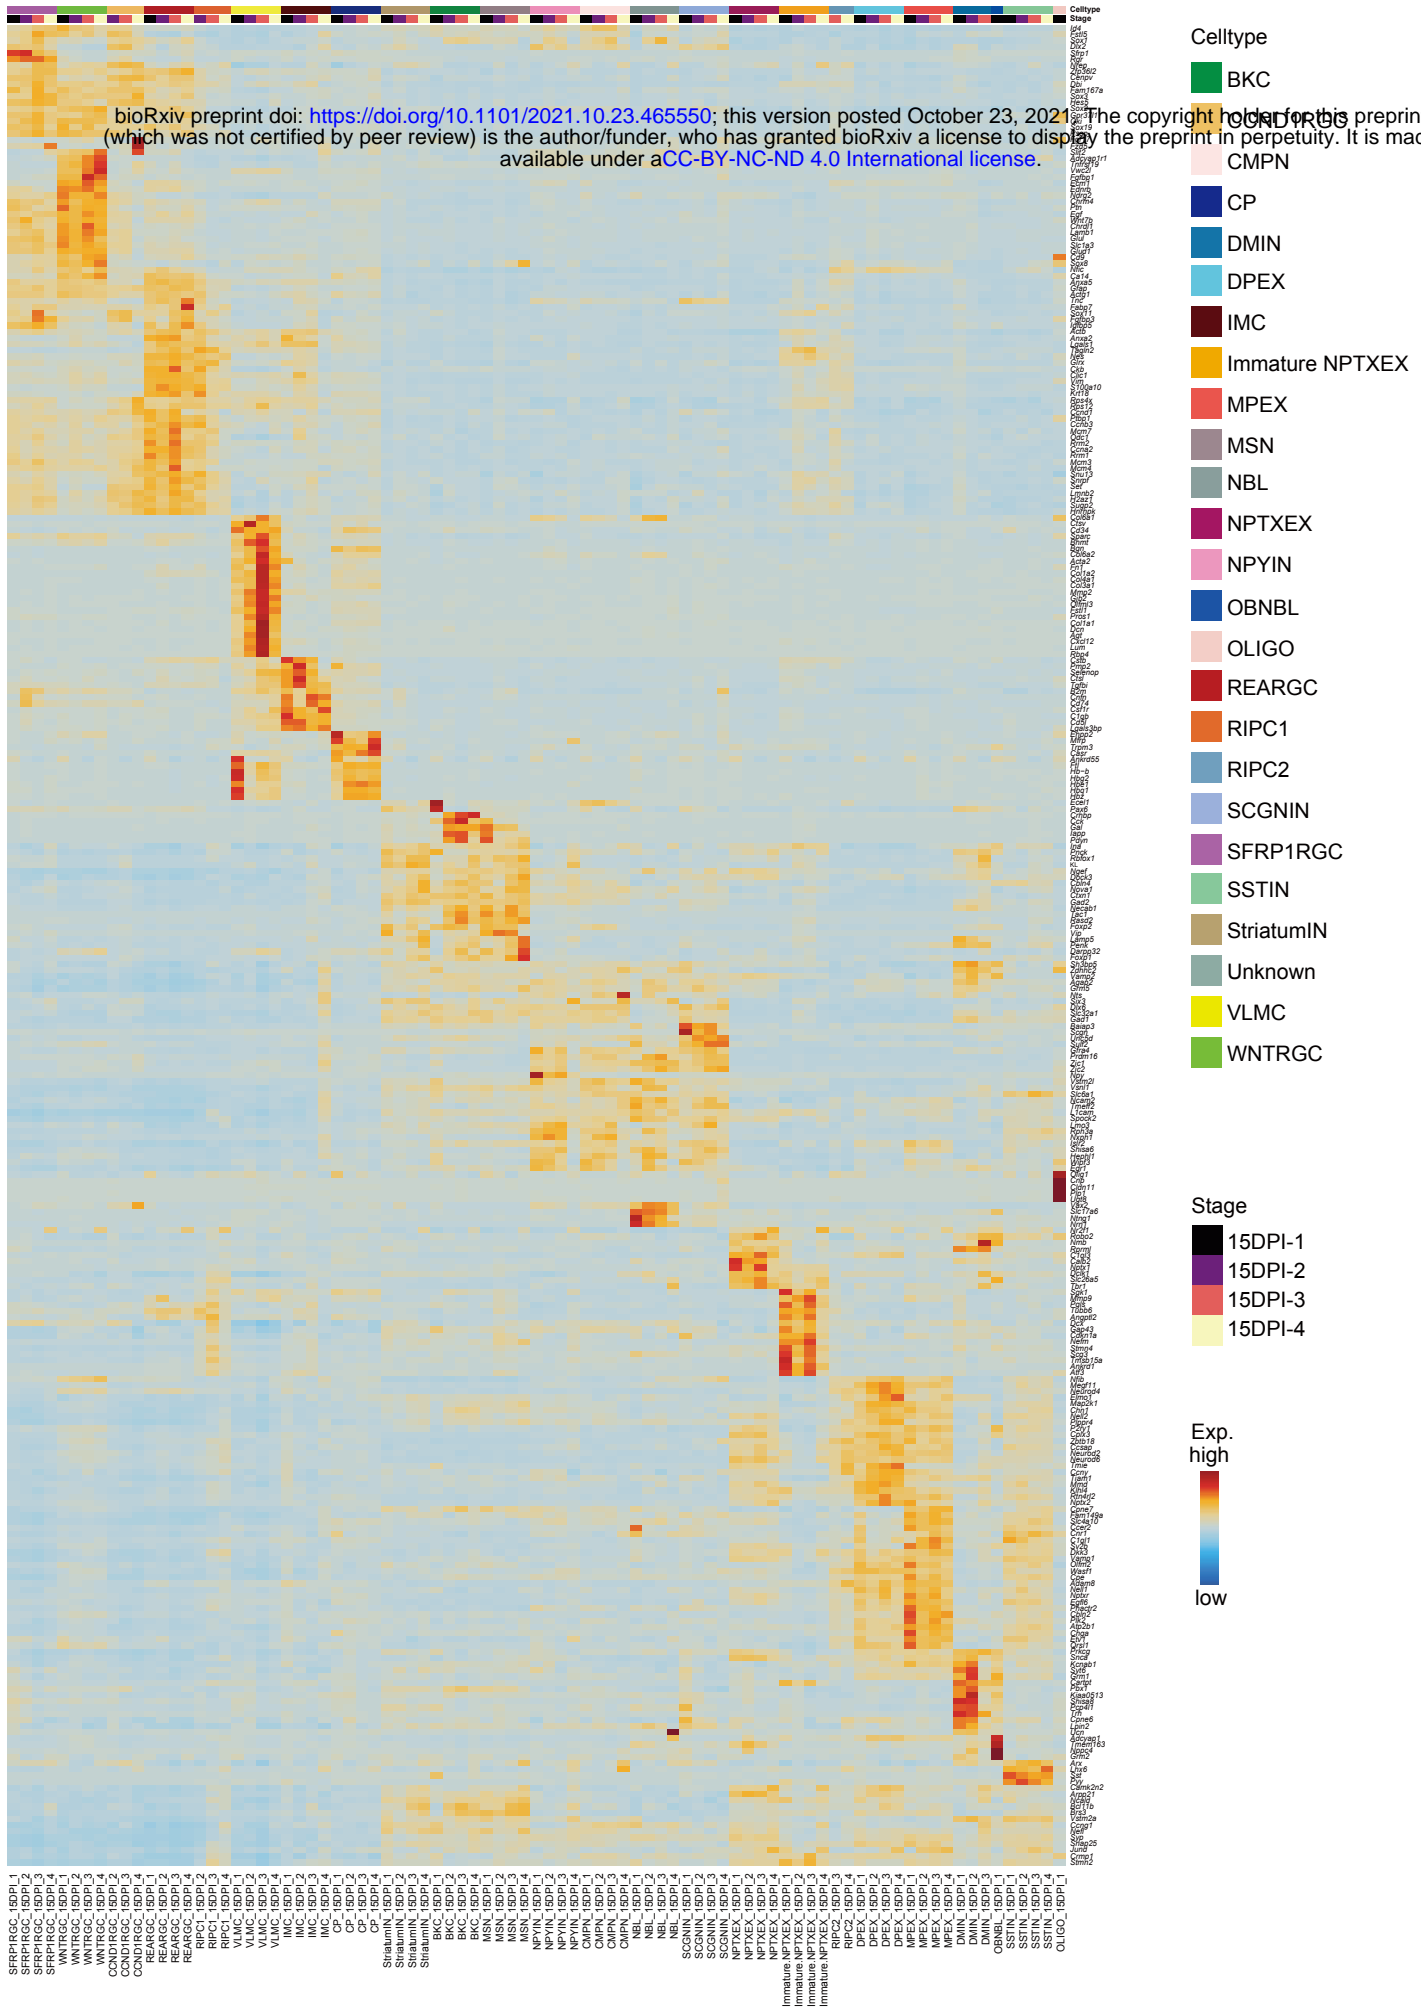

Figure S24

15 DPI-2

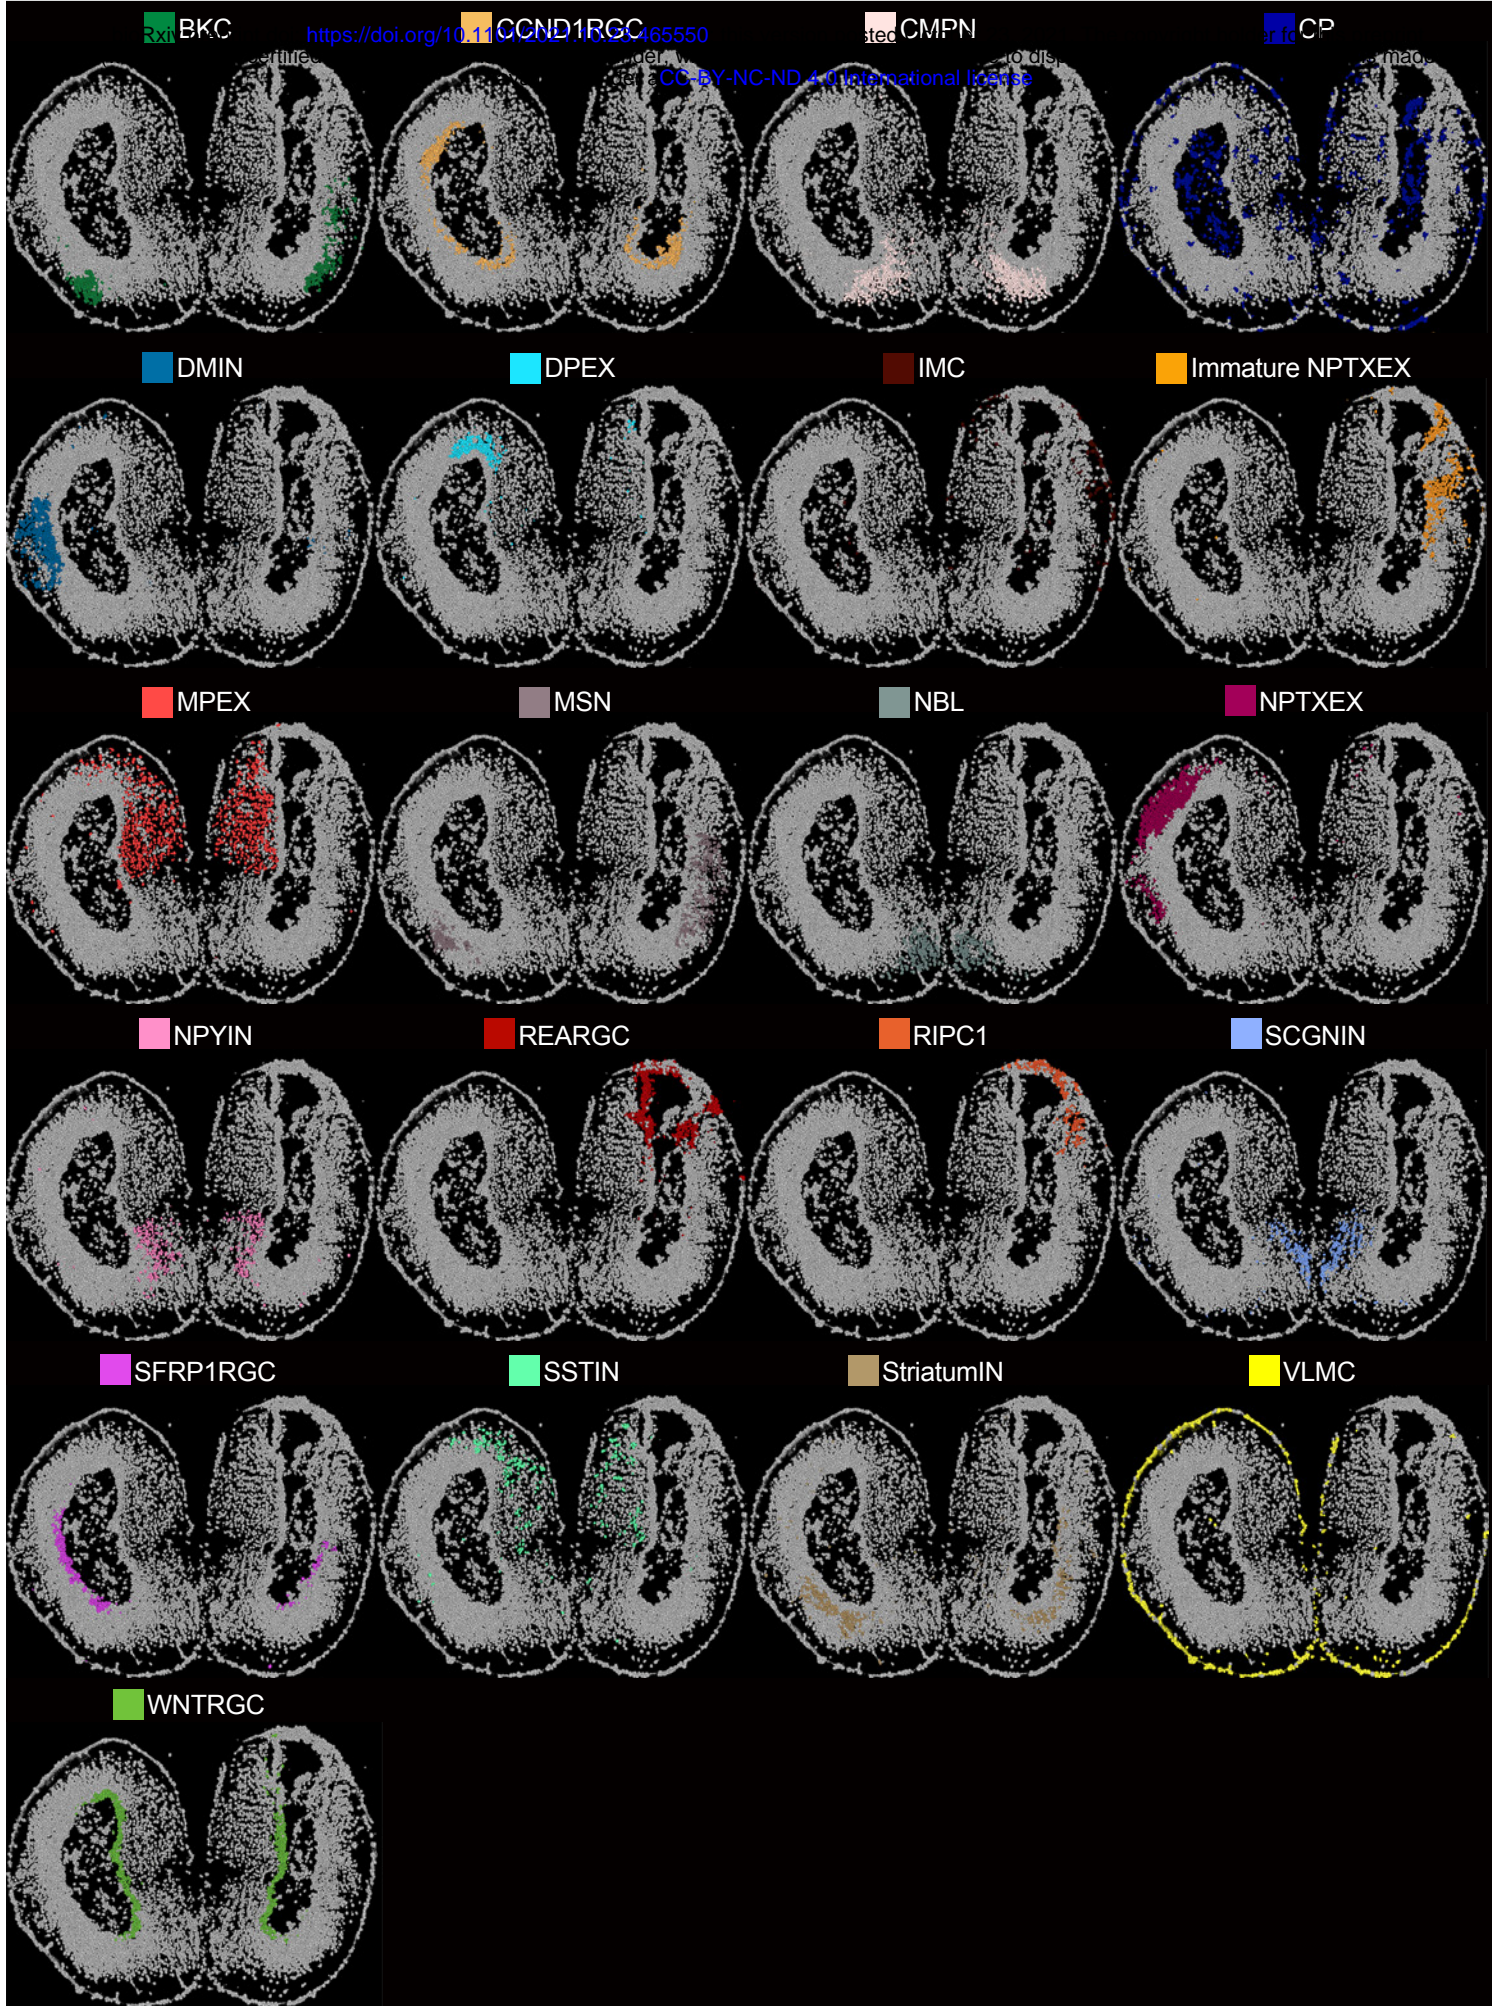

Figure S25

# 15 DPI-3

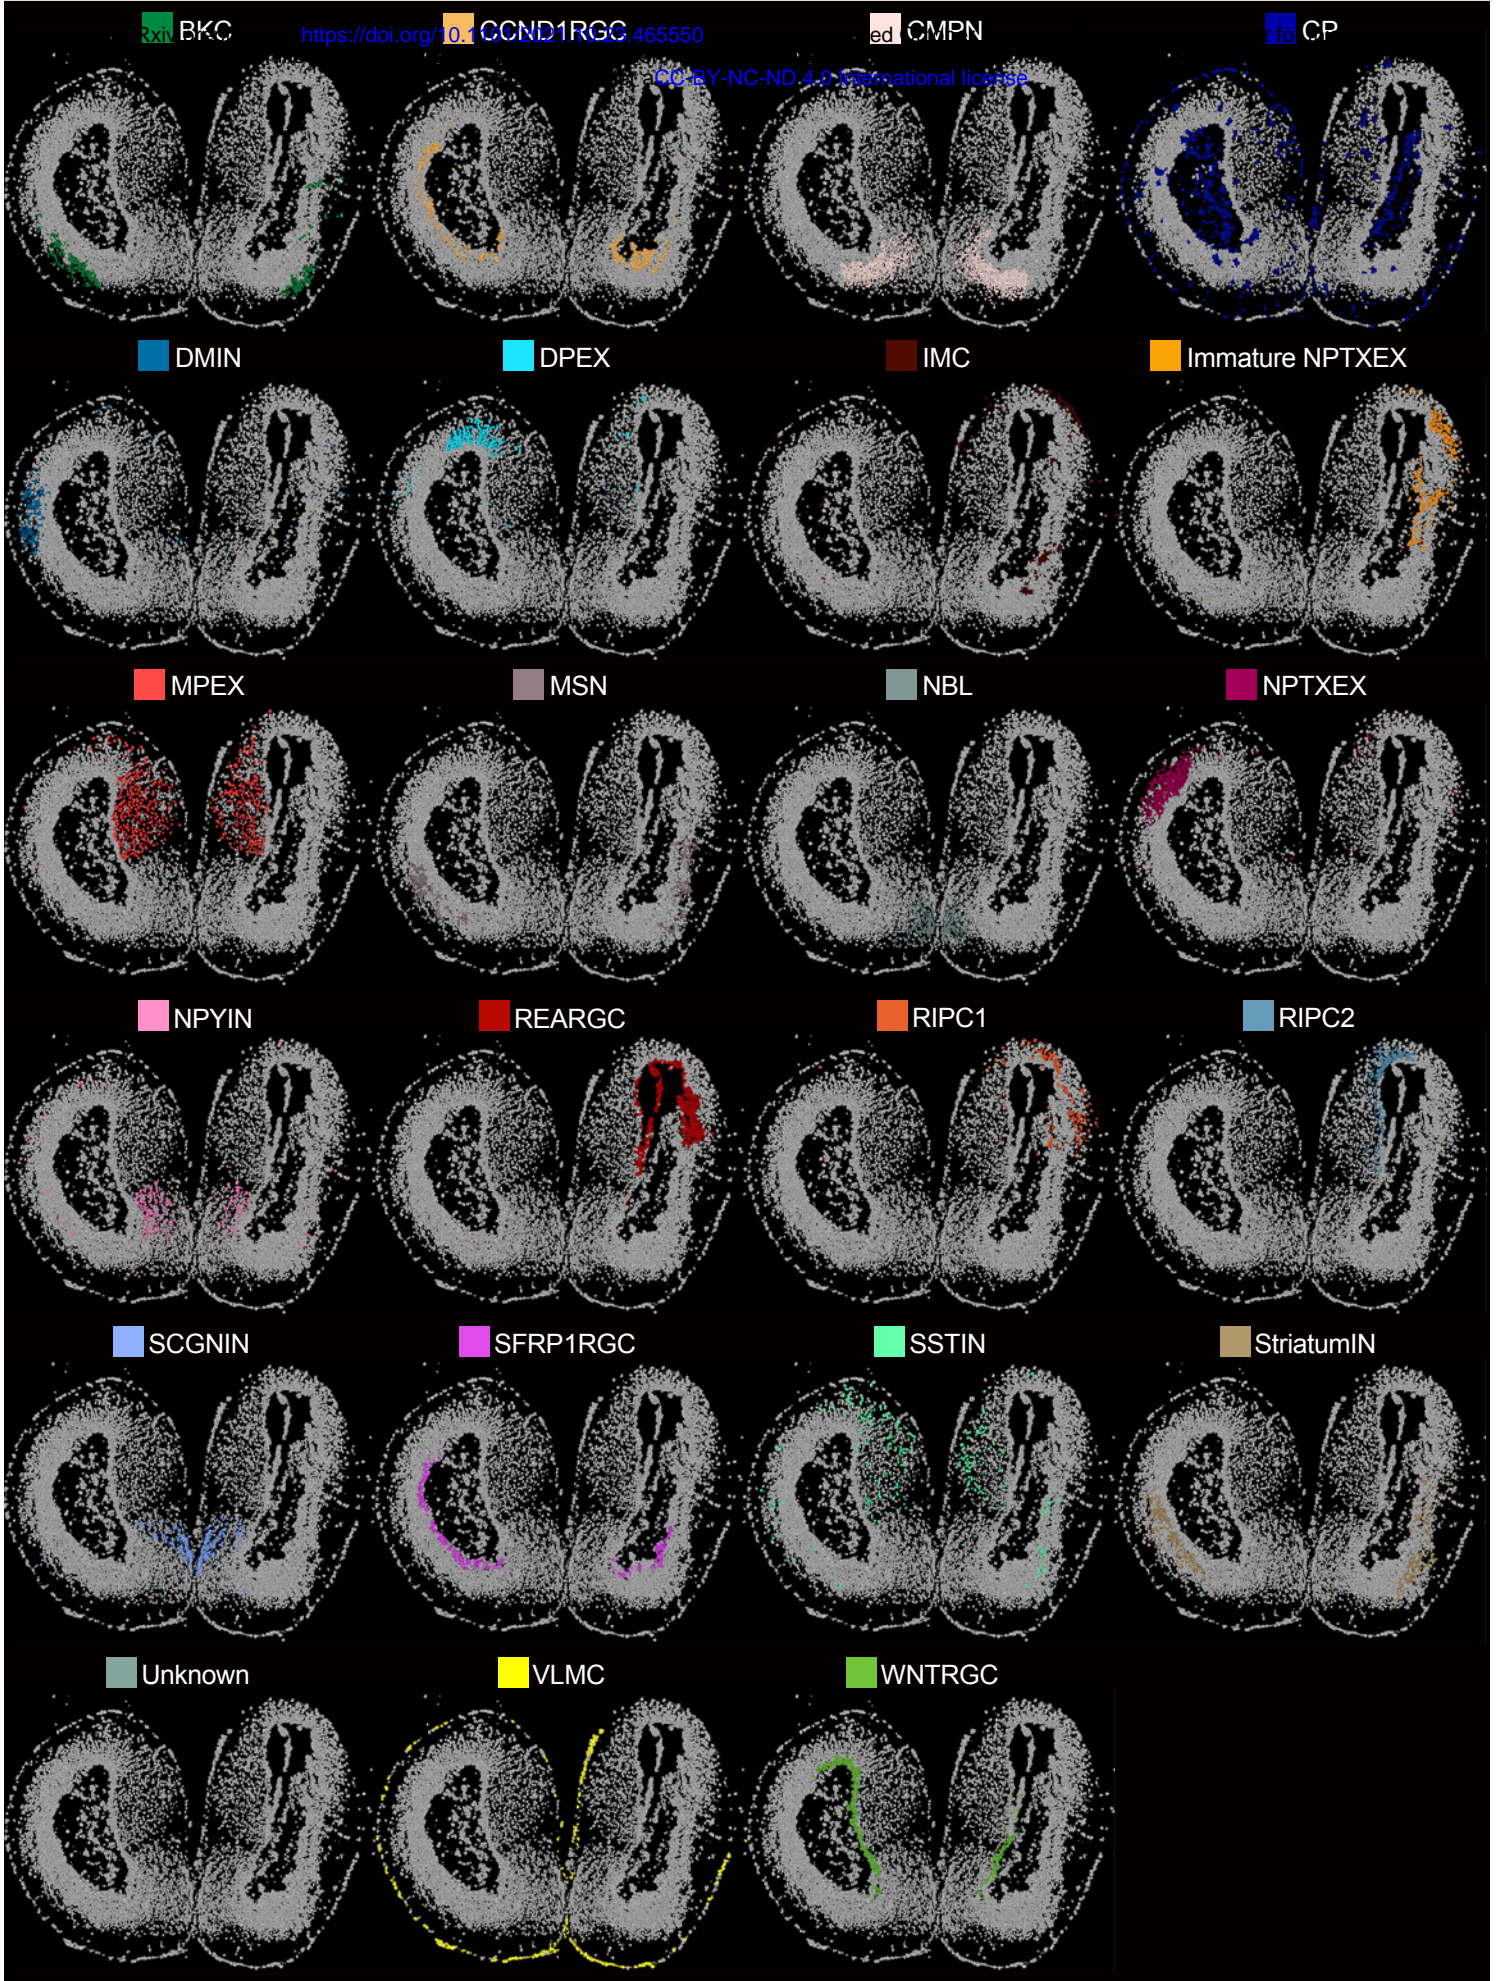

Figure S26

# 15 DPI-4

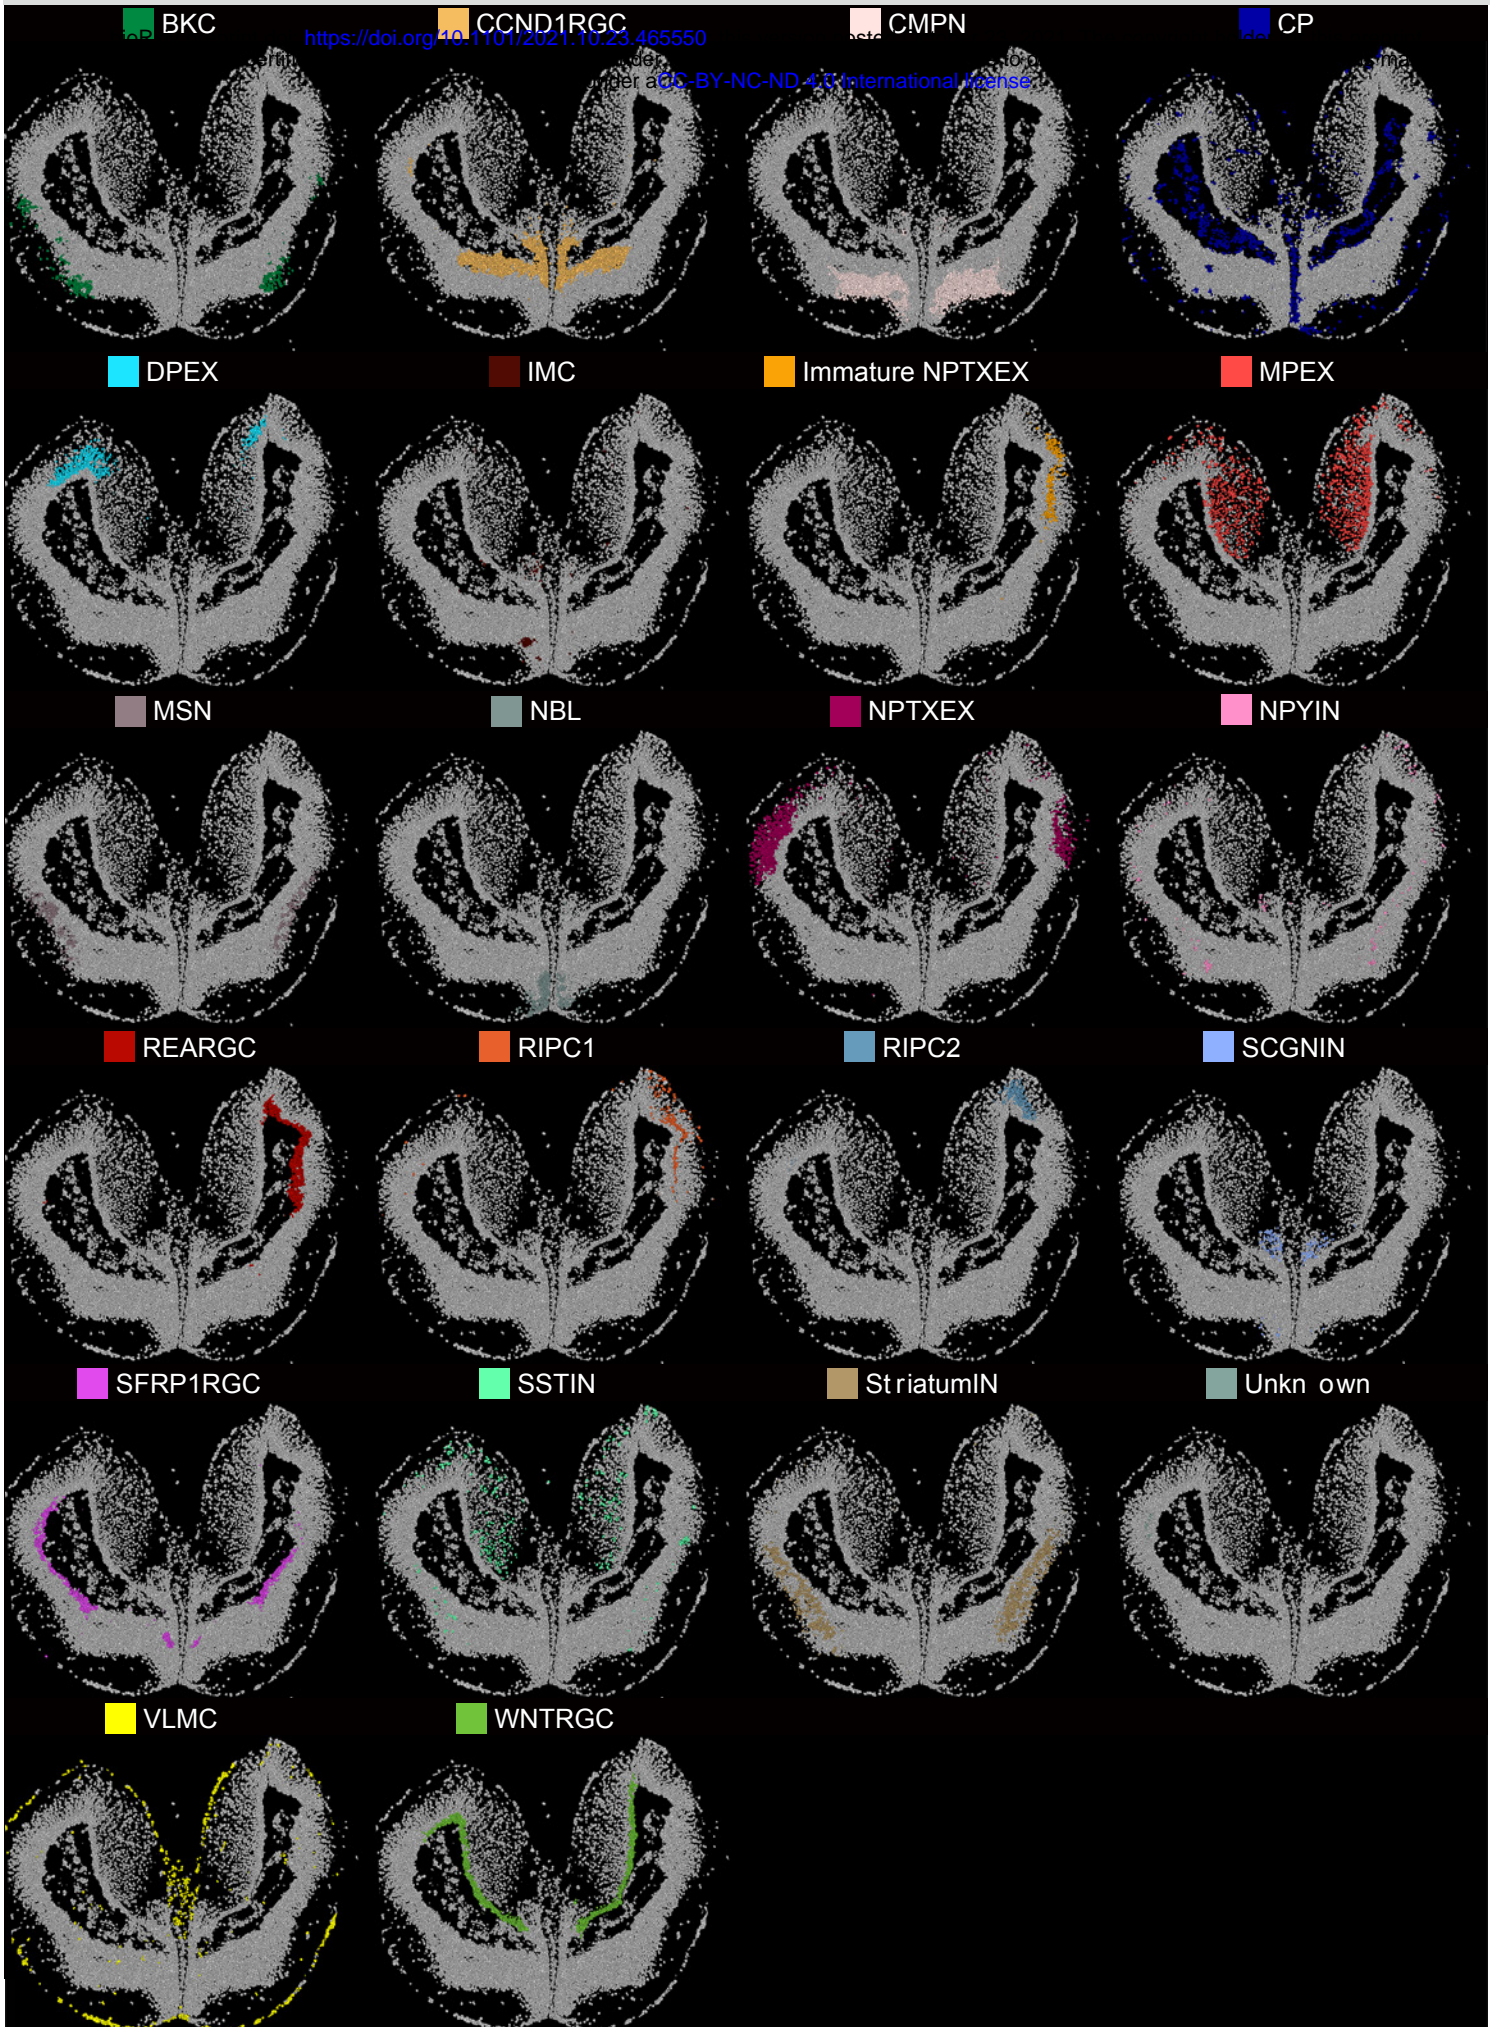

Figure S27

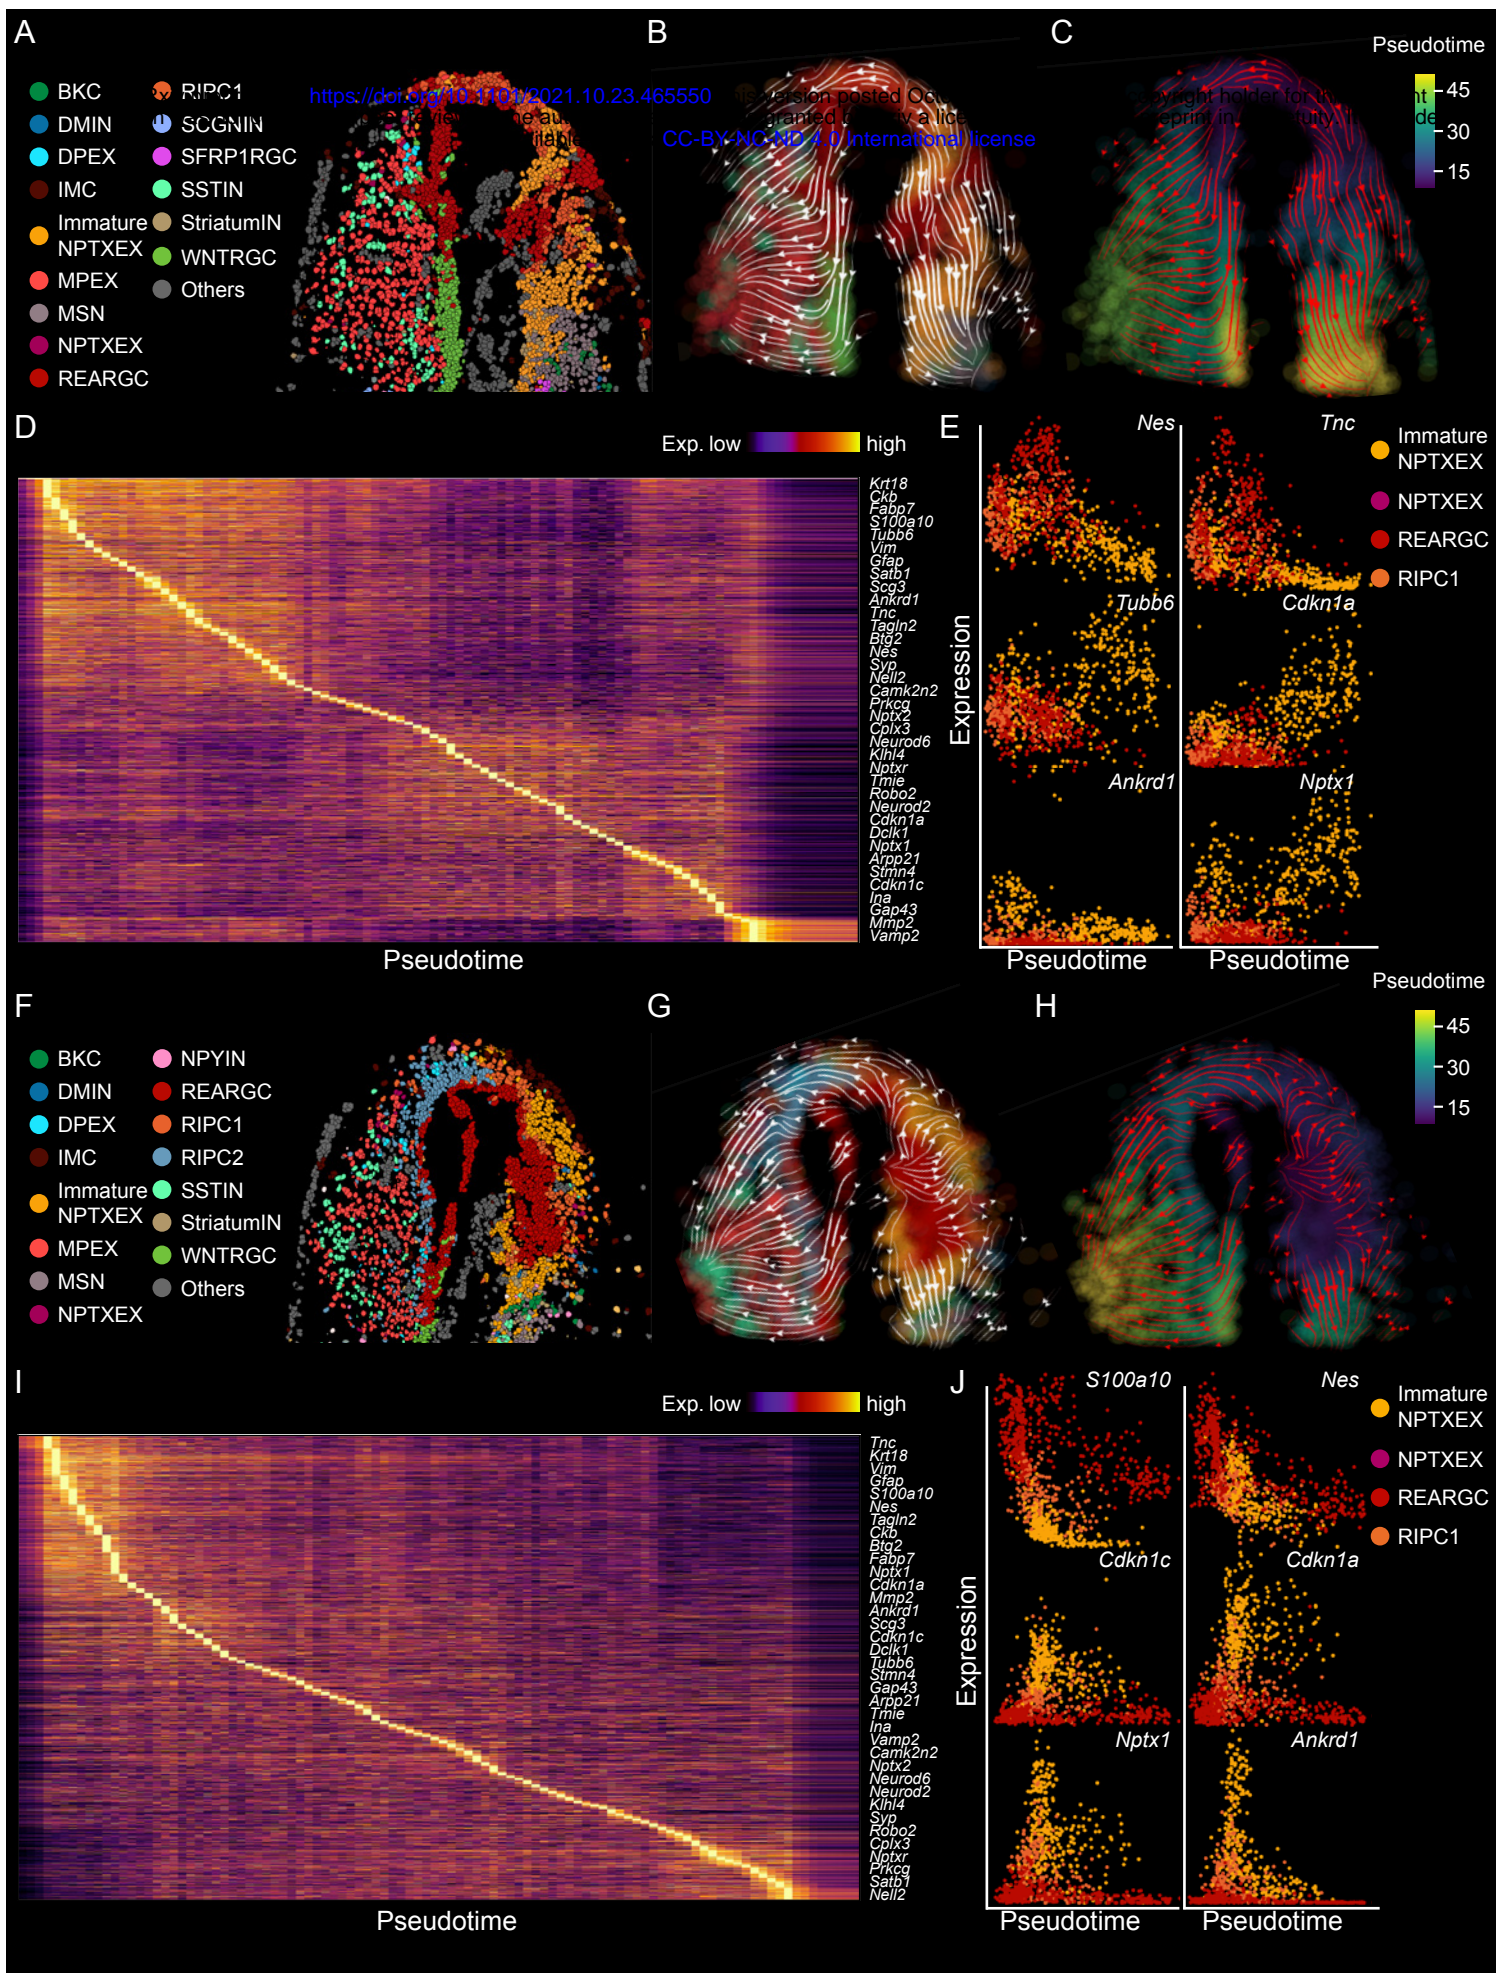

Figure S28



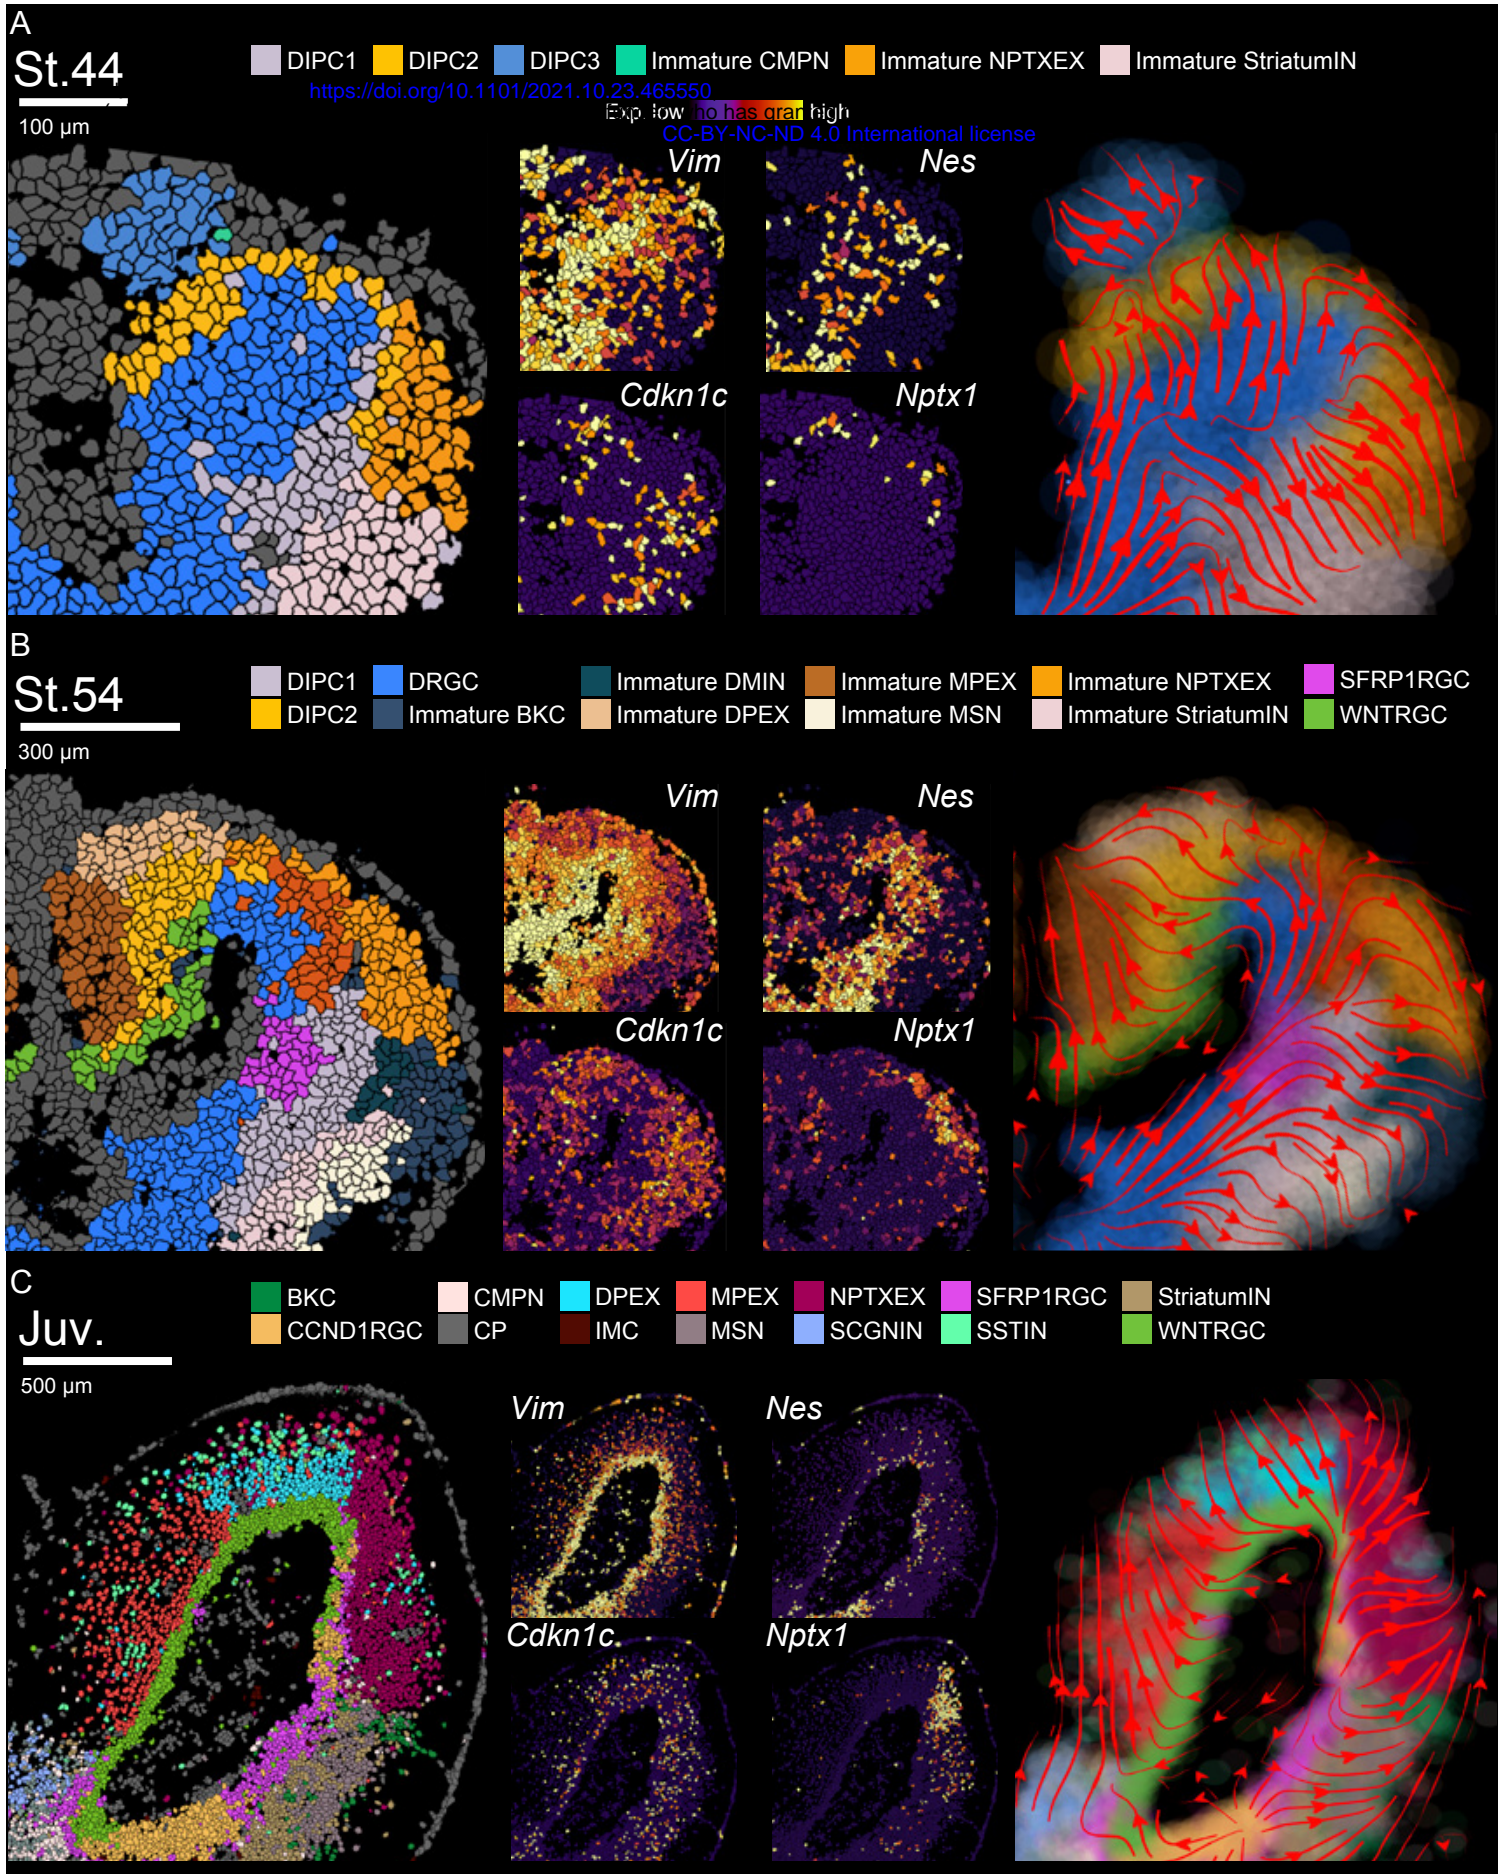

Figure S29

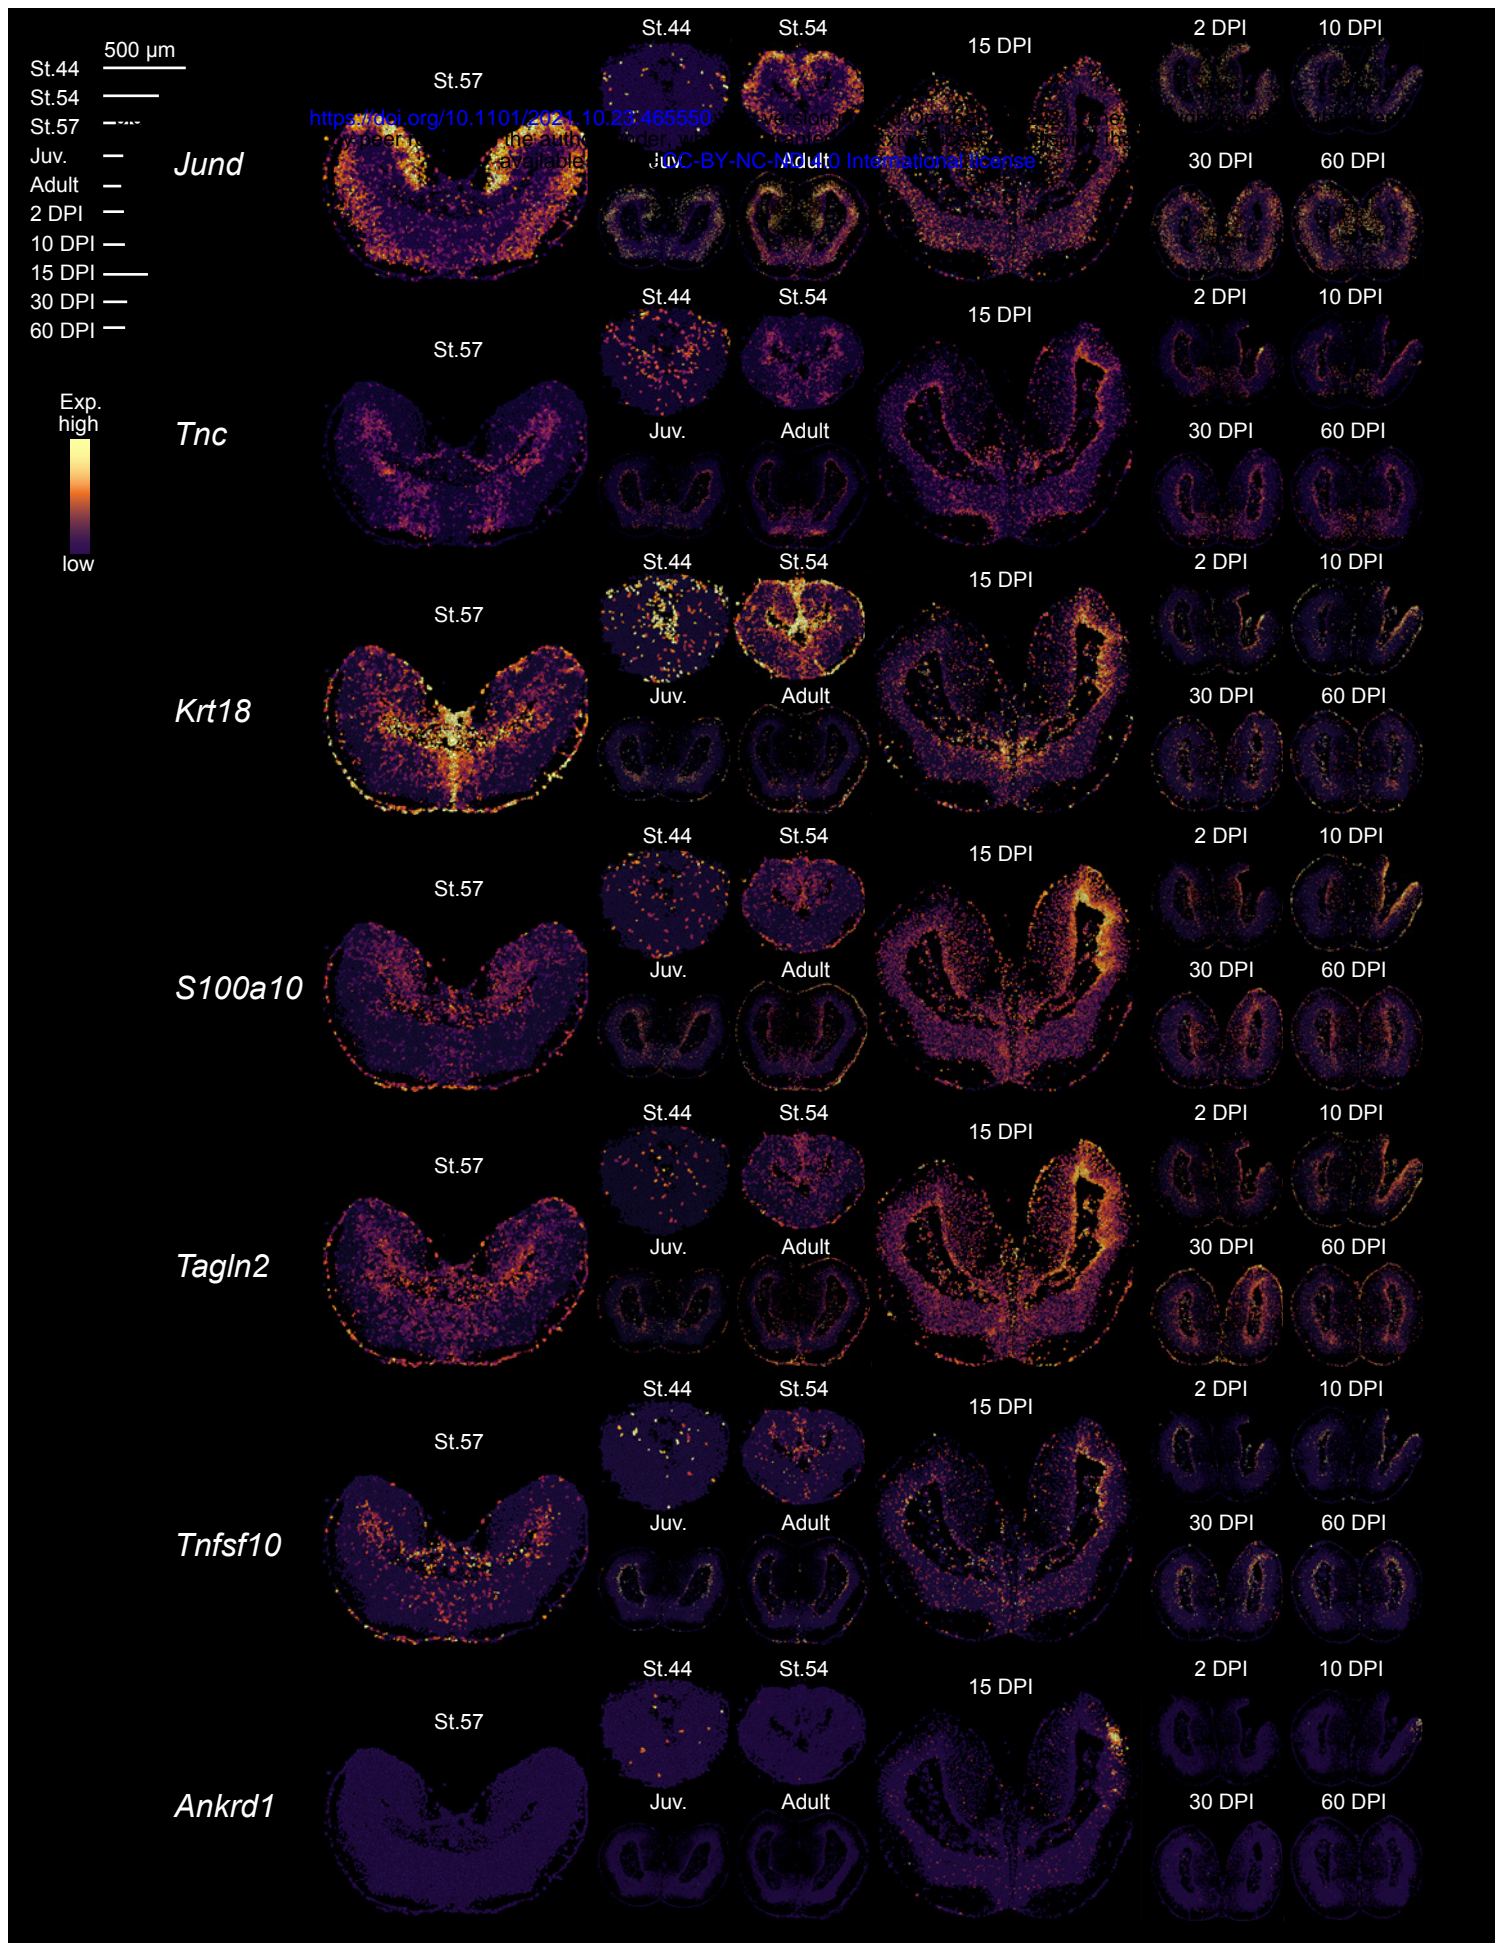

Figure S30
